# Supplementary material for: Comparative analysis of quantitative phosphoproteomics between two tilapias (Oreochromis niloticus and Oreochromis aureus) under low-temperature stress
Source: PeerJ. 2023 Jul 10;11:e15599. doi: 10.7717/peerj.15599 (PMC10340112; doi:10.7717/peerj.15599)
Supplement: Supplemental Information 4 [file peerj-11-15599-s004.xlsx]

## Sheet: sheet1
id	Accession	Description	Protein group ID	Position	Localization prob	Score diff	PEP	Score	Delta score	Score for localization	Amino acid	Phospho (STY) Probabilities	Phospho (STY) Score diffs	Position in peptide	Charge	Mass error [ppm]	Peptide IDs	MS/MS IDs	Best localization MS/MS ID	Best localization raw file	Best localization scan number	ALY_10_L1_1 Area	ALY_10_L1_2 Area	ALY_30_L1_1 Area	ALY_30_L1_2 Area	ALY_10_L1_1 Normalized Area	ALY_10_L1_2 Normalized Area	ALY_30_L1_1 Normalized Area	ALY_30_L1_2 Normalized Area	L1_10 Area	L1_10 sd	L1_10 cv	L1_30 Area	L1_30 sd	L1_30 cv	L1_30:L1_10	L1_30:L1_10 PVal	L1_30:L1_10 adj. PVal	L1_30:L1_10 State
0	XP_031589813.2	keratin, type II cytoskeletal 8 [Oreochromis aureus]	932	125	1	82.7494	0.0103752	82.749	41.561	82.749	S	FAS(1)FIDK	FAS(83)FIDK	3	2	1.9032	2470	4866	4866	F4	49674	0.3615	0.293	0.11541	0.23009	0.36	0.29	0.15	0.2	0.325	0.05	0.1538	0.175	0.04	0.2286	0.545	0.00927601	0.0447322	down
49	XP_031612941.1	serine/arginine-rich splicing factor 3b [Oreochromis aureus]	53	109	1	45.4892	0.0348694	45.489	28.094	45.489	S	RS(1)PPPR	RS(45)PPPR	2	3	-0.60317	7716	15712	15712	F2	9268	0.38849	0.27873	0.12535	0.20744	0.38	0.28	0.16	0.18	0.33	0.07	0.2121	0.17	0.01	0.0588	0.527	0.00618819	0.0352878	down
49	XP_039475866.1	neural-cadherin [Oreochromis aureus]	3902	704	1	45.4892	0.0348694	45.489	28.094	45.489	S	RS(1)PPPR	RS(45)PPPR	2	3	-0.60317	7716	15712	15712	F2	9268	0.38849	0.27873	0.12535	0.20744	0.38	0.28	0.16	0.18	0.33	0.07	0.2121	0.17	0.01	0.0588	0.527	0.00618819	0.0352878	down
105	XP_031581616.1	deoxynucleotidyltransferase terminal-interacting protein 2 [Oreochromis aureus]	93	568	0.800327	8.4583	3.0169e-08	86.479	60.005	86.479	S	VT(0.086)AGS(0.8)DS(0.114)EPKDVIVEK	VT(-9.7)AGS(8.5)DS(-8.5)EPKDVIVEK	5	4	0.9896	11171	23008	23008	F3	40134	0.48151	0.33937	0.06953	0.10959	0.48	0.34	0.09	0.09	0.41	0.1	0.2439	0.09	0	0	0.227	0.000626612	0.0112265	down
168	XP_031581958.2	C-X-C chemokine receptor type 3-like [Oreochromis aureus]	127	332	1	68.359	0.00263244	68.359	49.116	68.359	S	GS(1)LWDLGVGQR	GS(68)LWDLGVGQR	2	2	-1.3015	3461	6871	6871	F5	45038	0.26913	0.34016	0.1418	0.24891	0.27	0.34	0.18	0.21	0.305	0.05	0.1639	0.195	0.02	0.1026	0.648	0.0116778	0.0486024	down
170	XP_039474983.1	C-X-C chemokine receptor type 3-like [Oreochromis aureus]	130	335	0.878343	8.58528	0.000765835	65.521	33.134	65.521	S	T(0.122)EPKAS(0.878)LWDLGVDQR	T(-8.6)EPKAS(8.6)LWDLGVDQR	6	3	-0.027332	9901	20385	20385	F4	46370	0.3161	0.30585	0.1579	0.22015	0.31	0.3	0.2	0.19	0.305	0.01	0.0328	0.195	0.01	0.0513	0.639	0.00013465	0.00545972	down
241	XP_031582422.1	ELKS/Rab6-interacting/CAST family member 1-like isoform X3 [Oreochromis aureus]	180	45	0.986133	19.528	7.77764e-50	157.58	132.86	157.58	S	NS(0.002)S(0.986)S(0.011)SSTGGLTGTGK	NS(-26)S(20)S(-20)S(-35)S(-39)T(-44)GGLT(-82)GT(-120)GK	3	2	-0.78977	6472;7530	12941	12941	F3	27149	0.34538	0.3134	0.12411	0.21711	0.34	0.31	0.16	0.19	0.325	0.02	0.0615	0.175	0.02	0.1143	0.54	0.00158597	0.0175551	down
267	XP_031582565.1	nuclear cap-binding protein subunit 3 isoform X2 [Oreochromis aureus]	192	576	0.98011	16.837	0.000540764	91.457	78.449	91.457	S	LGS(0.98)S(0.98)DDDDGS(0.04)GAAAR	LGS(17)S(17)DDDDGS(-17)GAAAR	3	2	-0.1133	5366	10825	10825	F1	24348	0.30292	0.31087	0.14948	0.23674	0.3	0.31	0.19	0.2	0.305	0.01	0.0328	0.195	0.01	0.0513	0.639	0.00013465	0.00545972	down
287	XP_031582650.1	uncharacterized protein C1orf21 homolog [Oreochromis aureus]	206	107	0.99993	42.2065	0.000495912	77.324	57.315	77.324	S	GRDYCS(1)EEEEEDGT	GRDY(-50)CS(42)EEEEEDGT(-42)	6	2	0.11382	3395	6733;6734;6735	6733	F1	22149	0.18768	0.18077	0.2687	0.36285	0.19	0.18	0.34	0.31	0.185	0.01	0.0541	0.325	0.02	0.0615	1.758	0.000359485	0.00940266	up
288	XP_031582654.1	elongation factor 2-like [Oreochromis aureus]	207	502	0.58648	1.51756	0.024079	58.433	31.544	58.433	S	FS(0.414)VS(0.586)PVVR	FS(-1.5)VS(1.5)PVVR	4	2	-0.81688	2694	5242	5242	F4	42360	0.29539	0.39585	0.12712	0.18164	0.29	0.39	0.16	0.16	0.34	0.07	0.2059	0.16	0	0	0.481	0.00324597	0.02531	down
288	XP_031594175.1	elongation factor 2 [Oreochromis aureus]	1374	502	0.58648	1.51756	0.024079	58.433	31.544	58.433	S	FS(0.414)VS(0.586)PVVR	FS(-1.5)VS(1.5)PVVR	4	2	-0.81688	2694	5242	5242	F4	42360	0.29539	0.39585	0.12712	0.18164	0.29	0.39	0.16	0.16	0.34	0.07	0.2059	0.16	0	0	0.481	0.00324597	0.02531	down
303	XP_039476671.1	vinexin isoform X5 [Oreochromis aureus]	218	208	0.99986	38.5269	3.82522e-12	105.84	99.038	105.84	S	LTPHGALPDWSEDVDRLS(1)DPGK	LT(-96)PHGALPDWS(-39)EDVDRLS(39)DPGK	18	4	0.71866	5825	11697	11697	F4	47078	0.19234	0.18917	0.23089	0.3876	0.19	0.19	0.29	0.33	0.19	0	0	0.31	0.03	0.0968	1.631	0.000974839	0.0151414	up
315	XP_039477126.1	PDZ and LIM domain protein 2 isoform X2 [Oreochromis aureus]	223	272	1	70.4884	3.07999e-05	102.87	73.786	70.488	S	FPGNLS(1)PNAPK	FPGNLS(70)PNAPK	6	2	3.282	2628	5141;5142;5143;5144;5145;5146;5147	5147	F5	36586	0.1865	0.2126	0.24235	0.35856	0.18	0.21	0.3	0.31	0.195	0.02	0.1026	0.305	0.01	0.0328	1.573	0.00218959	0.0218283	up
320	XP_031582865.1	AP2-associated protein kinase 1-like isoform X8 [Oreochromis aureus]	225	676	0.999496	32.9706	0.000319935	63.122	40.687	63.122	S	AAGS(0.999)NENLIPS(0.001)LNAFPEK	AAGS(33)NENLIPS(-33)LNAFPEK	4	3	0.037576	46	99	99	F5	46830	0.32092	0.32073	0.14354	0.21481	0.32	0.32	0.18	0.18	0.32	0	0	0.18	0	0	0.562	1.74521e-11	1.40932e-08	down
321	XP_031582865.1	AP2-associated protein kinase 1-like isoform X8 [Oreochromis aureus]	225	569	0.992909	21.4634	5.19888e-115	190.96	158.57	190.96	S	ILS(0.993)DVT(0.007)HSAVFGVPVSK	ILS(21)DVT(-21)HS(-56)AVFGVPVS(-170)K	3	3	0.54574	4278	8645	8645	F6	48648	0.30582	0.31571	0.14766	0.2308	0.3	0.31	0.19	0.2	0.305	0.01	0.0328	0.195	0.01	0.0513	0.639	0.00013465	0.00545972	down
330	XP_031582912.1	NEDD4-binding protein 1 [Oreochromis aureus]	231	880	0.999994	53.5954	8.52671e-24	134.91	117.09	134.91	S	SPNPGNHS(1)FAGSASSFSSSK	S(-54)PNPGNHS(54)FAGS(-57)AS(-76)S(-86)FS(-100)S(-110)S(-110)K	8	3	1.1521	8233;8968	18390	18390	F5	30624	0.18639	0.16132	0.30073	0.35156	0.18	0.16	0.38	0.3	0.17	0.01	0.0588	0.34	0.06	0.1765	2.007	0.00286943	0.0230964	up
335	XP_031582953.1	mRNA decay activator protein ZFP36L1a [Oreochromis aureus]	236	114	0.765606	5.28557	0.0240616	66.498	33.269	66.498	S	DRS(0.766)YS(0.227)ET(0.008)GER	DRS(5.3)Y(-40)S(-5.3)ET(-20)GER	3	2	0.65318	1534	3098;3099	3099	F2	16138	0.27817	0.35128	0.15042	0.25629	0.28	0.35	0.19	0.22	0.315	0.05	0.1587	0.205	0.02	0.0976	0.659	0.0117107	0.0486882	down
336	XP_031582953.1	mRNA decay activator protein ZFP36L1a [Oreochromis aureus]	236	237	0.99755	26.1794	1.12356e-114	187.19	164.2	81.884	S	LQHS(0.002)YS(0.998)FAGFSNSAGLR	LQHS(-26)Y(-44)S(26)FAGFS(-52)NS(-59)AGLR	6	3	-1.5286	5664	11368;11369;11370;11371	11369	F1	44135	0.31407	0.36035	0.10283	0.22275	0.31	0.36	0.13	0.19	0.335	0.04	0.1194	0.16	0.04	0.2500	0.48	0.00774449	0.0392524	down
337	XP_031582953.1	mRNA decay activator protein ZFP36L1a [Oreochromis aureus]	236	368	0.999818	37.3906	0.000334231	109.79	91.013	107.66	S	LS(1)ITDD	LS(37)IT(-37)DD	2	2	-1.4432	5741;7437	11495;15102	11495	F2	40584	0.31628	0.34498	0.13576	0.20298	0.31	0.34	0.17	0.17	0.325	0.02	0.0615	0.17	0	0	0.524	0.000149736	0.00591571	down
338	XP_031582953.1	mRNA decay activator protein ZFP36L1a [Oreochromis aureus]	236	71	0.998089	27.3939	0.0104913	52.247	33.153	52.247	S	RHS(0.998)VS(0.002)STK	RHS(27)VS(-27)S(-44)T(-43)K	3	3	0.84464	7350	14933	14933	F3	11288	0.31463	0.3012	0.17151	0.21265	0.31	0.3	0.22	0.18	0.305	0.01	0.0328	0.2	0.03	0.1500	0.656	0.00533871	0.0322031	down
353	XP_031583018.2	Y-box-binding protein 2-B isoform X1 [Oreochromis aureus]	240	249	0.944507	12.3098	1.11043e-24	89.266	76.945	89.266	S	SELPQQQPQHDEAAAAAPES(0.945)PQT(0.055)NGEAGEGQGQK	S(-58)ELPQQQPQHDEAAAAAPES(12)PQT(-12)NGEAGEGQGQK	20	4	-2.1738	8238	16843;16844;16845	16843	F2	32068	0.16729	0.19982	0.23864	0.3571	0.17	0.2	0.3	0.31	0.185	0.02	0.1081	0.305	0.01	0.0328	1.66	0.00184425	0.0193152	up
387	XP_031583237.1	growth hormone receptor a [Oreochromis aureus]	253	496	0.999433	29.9405	0.00167248	65.943	50.705	41.554	S	RKES(0.999)EDS(0.441)EES(0.56)EER	RKES(30)EDS(-1)EES(1)EER	4	3	-0.9206	4619;7389	9363;15010;15011;15012	15011	F4	13986	0.70738	0.58819	0.28224	0.38831	0.7	0.58	0.36	0.33	0.64	0.08	0.125	0.345	0.02	0.0580	0.544	0.00199529	0.0203599	down
388	XP_031583237.1	growth hormone receptor a [Oreochromis aureus]	253	499	0.907532	9.91587	0.0124994	46.925	37.642	46.925	S	RKES(0.999)EDS(0.908)EES(0.093)EER	RKES(32)EDS(9.9)EES(-9.9)EER	7	3	-0.0029427	4619;7389	15010	15010	F2	15868	0.4062	0.27214	0.13648	0.18519	0.4	0.27	0.17	0.16	0.335	0.09	0.2687	0.165	0.01	0.0606	0.512	0.00930154	0.0447322	down
461	XP_031583580.1	death-associated protein kinase 2 [Oreochromis aureus]	291	340	0.999982	47.9322	1.45987e-08	90.968	76.952	90.968	S	QCES(1)DVEDTESKPASLLR	QCES(48)DVEDT(-48)ES(-57)KPAS(-72)LLR	4	3	1.1437	6634	13284;13285	13284	F3	42319	0.21397	0.18064	0.25348	0.35191	0.21	0.18	0.32	0.3	0.195	0.02	0.1026	0.31	0.01	0.0323	1.599	0.00234857	0.022507	up
463	XP_031583600.1	ubiquitin carboxyl-terminal hydrolase 16 [Oreochromis aureus]	292	435	0.985363	18.6887	3.69845e-20	139	107.58	139	S	TSASSQDDS(0.001)S(0.013)S(0.985)PVR	T(-100)S(-93)AS(-61)S(-52)QDDS(-29)S(-19)S(19)PVR	11	2	1.4157	10328	21272	21272	F1	14966	0.17356	0.20569	0.22494	0.39581	0.17	0.2	0.28	0.34	0.185	0.02	0.1081	0.31	0.04	0.1290	1.687	0.00588191	0.0338468	up
476	XP_031583700.1	dual specificity mitogen-activated protein kinase kinase 7 isoform X2 [Oreochromis aureus]	301	60	0.510879	0.58589	0.002645	43.198	32.731	43.198	S	S(0.01)S(0.011)S(0.011)S(0.011)ES(0.511)S(0.446)PQHHPYPSRPR	S(-17)S(-17)S(-17)S(-17)ES(0.59)S(-0.59)PQHHPY(-39)PS(-33)RPR	6	4	-0.42439	9440	19402	19402	F4	14453	0.19779	0.18036	0.27254	0.34931	0.2	0.18	0.34	0.3	0.19	0.01	0.0526	0.32	0.03	0.0938	1.689	0.00159815	0.0175637	up
483	XP_031583712.1	serine/threonine-protein kinase N1 isoform X2 [Oreochromis aureus]	305	113	0.998142	27.3016	0.000630335	63.979	45.614	63.979	S	GGEENRDECPQS(0.998)PGAES(0.002)R	GGEENRDECPQS(27)PGAES(-27)R	12	3	-0.32531	3001	5841	5841	F1	16000	0.18081	0.18419	0.29555	0.33944	0.18	0.18	0.37	0.29	0.18	0	0	0.33	0.06	0.1818	1.833	0.00341505	0.0256685	up
486	XP_031583716.1	glutaminase kidney isoform, mitochondrial-like [Oreochromis aureus]	308	594	0.809454	6.85619	0.00138909	48.823	38.901	48.823	S	VYDDIDS(0.023)LS(0.809)NT(0.167)DEQK	VY(-34)DDIDS(-15)LS(6.9)NT(-6.9)DEQK	9	3	0.58523	11297	23240	23240	F2	43264	0.33076	0.31817	0.1294	0.22168	0.33	0.31	0.16	0.19	0.32	0.01	0.0312	0.175	0.02	0.1143	0.547	0.00141733	0.0168973	down
490	XP_031583747.1	high mobility group AT-hook 1a isoform X1 [Oreochromis aureus]	311	89	0.999546	33.4247	4.39354e-251	238.02	238.02	163.64	S	AS(0.001)QES(1)S(1)EEEEEEDQ	AS(-33)QES(33)S(38)EEEEEEDQ	5	2	-0.84874	848	1840;1841;1842;1843;1844;1845;1847	1842	F1	18550	0.39415	0.41187	0.56715	0.64165	0.39	0.41	0.71	0.55	0.4	0.01	0.025	0.63	0.11	0.1746	1.576	0.00957507	0.045591	up
490	XP_039460400.1	high mobility group AT-hook 1a isoform X2 [Oreochromis aureus]	312	84	0.999546	33.4247	4.39354e-251	238.02	238.02	163.64	S	AS(0.001)QES(1)S(1)EEEEEEDQ	AS(-33)QES(33)S(38)EEEEEEDQ	5	2	-0.84874	848	1840;1841;1842;1843;1844;1845;1847	1842	F1	18550	0.39415	0.41187	0.56715	0.64165	0.39	0.41	0.71	0.55	0.4	0.01	0.025	0.63	0.11	0.1746	1.576	0.00957507	0.045591	up
528	XP_039459755.1	peptidyl-prolyl cis-trans isomerase E isoform X2 [Oreochromis aureus]	334	90	0.998526	31.319	2.47864e-06	90.316	68.918	90.316	S	EGS(0.001)S(0.001)RPVWS(0.999)DDDWLKK	EGS(-31)S(-31)RPVWS(31)DDDWLKK	9	4	0.053593	1971	3955	3955	F4	44336	0.369	0.36104	0.11476	0.1552	0.37	0.36	0.14	0.13	0.365	0.01	0.0274	0.135	0.01	0.0741	0.37	2.70893e-05	0.00183067	down
606	XP_031584036.1	tyrosine-protein phosphatase non-receptor type 9 [Oreochromis aureus]	347	325	0.988054	19.1757	0.000342711	66.264	47.851	66.264	S	GQGQHQHS(0.988)PNS(0.012)AADR	GQGQHQHS(19)PNS(-19)AADR	8	3	0.21344	3368	6680	6680	F2	8052	0.16822	0.15915	0.30435	0.36828	0.17	0.16	0.38	0.32	0.165	0.01	0.0606	0.35	0.04	0.1143	2.123	0.000752605	0.0127711	up
646	XP_031584296.1	ubiquitin-conjugating enzyme E2 E1 [Oreochromis aureus]	371	14	0.739663	4.99177	3.67317e-05	75.826	60.286	75.826	S	ASTS(0.001)S(0.005)S(0.019)S(0.74)S(0.234)PPS(0.001)SSQTR	AS(-41)T(-36)S(-31)S(-22)S(-16)S(5)S(-5)PPS(-31)S(-34)S(-36)QT(-34)R	7	2	0.54712	905	1945	1945	F2	14933	0.1952	0.20349	0.23923	0.36208	0.19	0.2	0.3	0.31	0.195	0.01	0.0513	0.305	0.01	0.0328	1.565	0.00013396	0.00545972	up
672	XP_039470767.1	WD repeat-containing protein 7 isoform X2 [Oreochromis aureus]	378	852	0.937171	11.7366	0.000773495	71.344	32.941	71.344	S	KLS(0.937)LS(0.063)DIVGK	KLS(12)LS(-12)DIVGK	3	3	0.40306	4787	9687	9687	F5	42858	0.36468	0.32524	0.11877	0.19131	0.36	0.32	0.15	0.16	0.34	0.03	0.0882	0.155	0.01	0.0645	0.457	0.000262794	0.0076821	down
693	XP_031584428.1	T-box transcription factor TBX2b isoform X2 [Oreochromis aureus]	391	348	0.999964	43.8999	3.24582e-08	86.006	75.748	86.006	S	DDKT(0.116)CT(0.884)DS(1)EQELEHQDER	DDKT(-8.8)CT(8.8)DS(44)EQELEHQDER	8	3	0.58707	1190	2487;2488	2488	F2	26576	0.17479	0.21267	0.22979	0.38274	0.17	0.21	0.29	0.33	0.19	0.03	0.1579	0.31	0.03	0.0968	1.65	0.00624937	0.0354269	up
708	XP_031584465.2	signal recognition particle subunit SRP72 [Oreochromis aureus]	396	621	0.888494	10.1625	6.13524e-25	100.71	88.004	62.02	S	T(0.019)AS(0.088)S(0.867)PPT(0.131)S(0.888)PRPGS(0.002)AS(0.002)GS(0.001)S(0.001)T(0.001)APASGVVPPR	T(-17)AS(-11)S(11)PPT(-10)S(10)PRPGS(-27)AS(-27)GS(-32)S(-32)T(-32)APAS(-37)GVVPPR	8	3	-0.97299	9810;9811	20201;20202;20203;20204;20205;20206;20207;20208;20209	20209	F6	29316	0.3282	0.28243	0.16189	0.21615	0.32	0.28	0.2	0.19	0.3	0.03	0.1	0.195	0.01	0.0513	0.653	0.00189308	0.0194977	down
710	XP_031584505.1	dystrobrevin, beta a isoform X3 [Oreochromis aureus]	398	530	0.928803	12.8131	2.09675e-11	103.63	77.486	79.426	S	AQAAGSSHSS(0.004)PS(0.018)RPS(0.929)PS(0.049)AVR	AQAAGS(-33)S(-33)HS(-34)S(-24)PS(-17)RPS(13)PS(-13)AVR	15	3	-0.095474	735	1627;1628;1629	1628	F4	19530	0.19698	0.13727	0.25296	0.40054	0.2	0.14	0.32	0.34	0.17	0.04	0.2353	0.33	0.01	0.0303	2.004	0.00740745	0.0387158	up
735	XP_031584624.1	phosphatidylinositol 4,5-bisphosphate 3-kinase catalytic subunit gamma isoform [Oreochromis aureus]	407	344	1	57.1357	0.000725495	57.136	26.308	57.136	S	DLDDIFMIS(1)LWDCNR	DLDDIFMIS(57)LWDCNR	9	3	1.1929	1382	2791	2791	F2	48178	0.29871	0.42261	0.12731	0.15138	0.3	0.42	0.16	0.13	0.36	0.08	0.2222	0.145	0.02	0.1379	0.414	0.00419187	0.0287882	down
743	XP_031584639.1	brefeldin A-inhibited guanine nucleotide-exchange protein 2 [Oreochromis aureus]	411	1652	1	101.532	0.000125434	101.53	79.901	101.53	S	DALEES(1)EAEGR	DALEES(100)EAEGR	6	2	-0.68063	1148	2390	2390	F1	25625	0.16621	0.19588	0.26358	0.37432	0.16	0.19	0.33	0.32	0.175	0.02	0.1143	0.325	0.01	0.0308	1.871	0.001141	0.0159874	up
772	XP_031584712.1	ubiquitin carboxyl-terminal hydrolase 8 [Oreochromis aureus]	423	419	0.973553	16.5329	2.75805e-06	90.316	74.432	90.316	S	KAPAAST(0.001)S(0.003)S(0.022)QS(0.974)PAT(0.001)PK	KAPAAS(-40)T(-32)S(-25)S(-17)QS(17)PAT(-31)PK	11	3	0.95317	4531	9124	9124	F4	21942	0.20823	0.19116	0.25321	0.34741	0.21	0.19	0.32	0.3	0.2	0.01	0.05	0.31	0.01	0.0323	1.554	0.00102773	0.0154945	up
794	XP_039474346.1	RAC-beta serine/threonine-protein kinase-like isoform X1 [Oreochromis aureus]	442	31	0.569572	1.21669	0.0037353	54.784	37.844	54.784	S	S(0.57)DGS(0.43)FIGYK	S(1.2)DGS(-1.2)FIGY(-45)K	1	3	2.3045	8102	16560	16560	F3	39630	0.2056	0.20576	0.22687	0.36177	0.2	0.2	0.29	0.31	0.2	0	0	0.3	0.01	0.0333	1.5	0.000235213	0.00716239	up
821	XP_031585111.1	translationally-controlled tumor protein homolog [Oreochromis aureus]	453	45	0.956024	14.904	1.39054e-18	79.67	58.352	79.67	S	T(0.031)EGFDDS(0.956)LIAANAS(0.012)AEEAT(0.001)EGNEASTISGVDIVLNHK	T(-15)EGFDDS(15)LIAANAS(-19)AEEAT(-29)EGNEAS(-51)T(-51)IS(-59)GVDIVLNHK	7	4	1.8939	9882	20362	20362	F4	52278	0.17507	0.16953	0.22711	0.42829	0.17	0.17	0.29	0.37	0.17	0	0	0.33	0.06	0.1818	1.941	0.00260256	0.0230964	up
839	XP_031585134.1	protein NDRG1a [Oreochromis aureus]	458	350	0.995315	22.2496	0.00208559	55.196	18.904	55.196	S	S(0.478)HT(0.513)S(0.014)EGNRS(0.995)R	S(-0.3)HT(0.3)S(-17)EGNRS(22)R	9	2	-0.58628	8517	17414;17415;17416;17417	17414	F1	7028	0.59068	0.67264	0.260834	0.47286	0.58	0.67	0.33	0.41	0.625	0.06	0.096	0.37	0.06	0.1622	0.595	0.00593228	0.0340047	down
880	XP_031585358.1	acidic amino acid decarboxylase GADL1-like isoform X1 [Oreochromis aureus]	479	72	1	59.6073	0.000516178	59.607	33.172	59.607	S	VCEWHS(1)PEQLKK	VCEWHS(60)PEQLKK	6	4	1.8601	10640;10641	21940;21941	21941	F4	35658	0.19831	0.17743	0.28285	0.34141	0.2	0.18	0.36	0.29	0.19	0.01	0.0526	0.325	0.05	0.1538	1.715	0.00461033	0.030993	up
887	XP_039470794.1	PH and SEC7 domain-containing protein 4 [Oreochromis aureus]	485	756	1	61.0419	0.00221907	70.563	45.709	61.042	S	VVNEDPGDS(1)PR	VVNEDPGDS(61)PR	9	2	2.1476	11255	23163;23164	23164	F2	27677	0.32367	0.36493	0.13323	0.17817	0.32	0.36	0.17	0.15	0.34	0.03	0.0882	0.16	0.01	0.0625	0.472	0.000609131	0.0109644	down
904	XP_031585599.2	apoptotic chromatin condensation inducer 1b isoform X1 [Oreochromis aureus]	496	1121	0.999989	48.9993	0.000192458	71.781	58.58	71.781	S	EKDGS(1)VAT(0.908)S(0.092)GGAAGR	EKDGS(49)VAT(10)S(-10)GGAAGR	5	2	-3.7297	1281;2029	4067;4068	4068	F2	21284	0.41184	0.38531	0.07331	0.12953	0.41	0.38	0.09	0.11	0.395	0.02	0.0506	0.1	0.01	0.1000	0.254	0.000190687	0.00684975	down
904	XP_039465691.1	apoptotic chromatin condensation inducer 1b isoform X4 [Oreochromis aureus]	3666	1091	0.999989	48.9993	0.000192458	71.781	58.58	71.781	S	EKDGS(1)VAT(0.908)S(0.092)GGAAGR	EKDGS(49)VAT(10)S(-10)GGAAGR	5	2	-3.7297	1281;2029	4067;4068	4068	F2	21284	0.41184	0.38531	0.07331	0.12953	0.41	0.38	0.09	0.11	0.395	0.02	0.0506	0.1	0.01	0.1000	0.254	0.000190687	0.00684975	down
905	XP_031585599.2	apoptotic chromatin condensation inducer 1b isoform X1 [Oreochromis aureus]	496	1125	0.760107	5.11952	0.00421207	46.099	33.251	41.227	S	DGS(0.006)VAT(0.234)S(0.76)GGAAGR	DGS(-21)VAT(-5.1)S(5.1)GGAAGR	7	2	-1.2521	1281;2029	2638;4067	2638	F2	17156	0.732	0.72103	0.20064	0.34632	0.72	0.71	0.25	0.3	0.715	0.01	0.014	0.275	0.04	0.1455	0.385	0.000371991	0.00940266	down
905	XP_039465691.1	apoptotic chromatin condensation inducer 1b isoform X4 [Oreochromis aureus]	3666	1095	0.760107	5.11952	0.00421207	46.099	33.251	41.227	S	DGS(0.006)VAT(0.234)S(0.76)GGAAGR	DGS(-21)VAT(-5.1)S(5.1)GGAAGR	7	2	-1.2521	1281;2029	2638;4067	2638	F2	17156	0.732	0.72103	0.20064	0.34632	0.72	0.71	0.25	0.3	0.715	0.01	0.014	0.275	0.04	0.1455	0.385	0.000371991	0.00940266	down
907	XP_031585599.2	apoptotic chromatin condensation inducer 1b isoform X1 [Oreochromis aureus]	496	641	0.998539	28.4644	0.000857675	85.813	52.584	85.813	S	KIS(0.999)LT(0.001)SSK	KIS(28)LT(-28)S(-44)S(-59)K	3	3	0.48595	4729	9556;9557;9558;9559;9560	9557	F4	32031	0.37567	0.31325	0.14157	0.16115	0.37	0.31	0.18	0.14	0.34	0.04	0.1176	0.16	0.03	0.1875	0.474	0.0034	0.0256685	down
907	XP_039465691.1	apoptotic chromatin condensation inducer 1b isoform X4 [Oreochromis aureus]	3666	611	0.998539	28.4644	0.000857675	85.813	52.584	85.813	S	KIS(0.999)LT(0.001)SSK	KIS(28)LT(-28)S(-44)S(-59)K	3	3	0.48595	4729	9556;9557;9558;9559;9560	9557	F4	32031	0.37567	0.31325	0.14157	0.16115	0.37	0.31	0.18	0.14	0.34	0.04	0.1176	0.16	0.03	0.1875	0.474	0.0034	0.0256685	down
912	XP_031585599.2	apoptotic chromatin condensation inducer 1b isoform X1 [Oreochromis aureus]	496	673	0.967944	17.8115	6.43669e-19	138.99	102.57	63.727	S	RWGS(0.968)S(0.016)T(0.016)AVTAK	RWGS(18)S(-18)T(-18)AVT(-49)AK	4	2	0.60348	7876;11323	16033;16034;16035;23276;23277;23278	16034	F5	28366	0.3347	0.2964	0.13243	0.21359	0.33	0.29	0.17	0.18	0.31	0.03	0.0968	0.175	0.01	0.0571	0.567	0.000802688	0.0129703	down
912	XP_031612890.2	apoptotic chromatin condensation inducer in the nucleus [Oreochromis aureus]	3087	1202	0.967944	17.8115	6.43669e-19	138.99	102.57	63.727	S	RWGS(0.968)S(0.016)T(0.016)AVTAK	RWGS(18)S(-18)T(-18)AVT(-49)AK	4	2	0.60348	7876;11323	16033;16034;16035;23276;23277;23278	16034	F5	28366	0.3347	0.2964	0.13243	0.21359	0.33	0.29	0.17	0.18	0.31	0.03	0.0968	0.175	0.01	0.0571	0.567	0.000802688	0.0129703	down
912	XP_039465691.1	apoptotic chromatin condensation inducer 1b isoform X4 [Oreochromis aureus]	3666	643	0.967944	17.8115	6.43669e-19	138.99	102.57	63.727	S	RWGS(0.968)S(0.016)T(0.016)AVTAK	RWGS(18)S(-18)T(-18)AVT(-49)AK	4	2	0.60348	7876;11323	16033;16034;16035;23276;23277;23278	16034	F5	28366	0.3347	0.2964	0.13243	0.21359	0.33	0.29	0.17	0.18	0.31	0.03	0.0968	0.175	0.01	0.0571	0.567	0.000802688	0.0129703	down
921	XP_031585632.2	AT-rich interactive domain-containing protein 1B isoform X2 [Oreochromis aureus]	500	556	0.894884	9.40653	1.61398e-07	107.57	89.827	107.57	S	T(0.001)GPS(0.895)PS(0.103)PS(0.002)PSPAGSGSQSR	T(-31)GPS(9.4)PS(-9.4)PS(-27)PS(-38)PAGS(-53)GS(-59)QS(-56)R	4	2	-0.97484	9972	20541	20541	F3	20869	0.2098	0.19556	0.22846	0.36619	0.21	0.19	0.29	0.32	0.2	0.01	0.05	0.305	0.02	0.0656	1.529	0.00188559	0.0194977	up
936	XP_039469944.1	E3 ubiquitin-protein ligase RBBP6-like isoform X2 [Oreochromis aureus]	509	1275	0.999995	52.6964	1.8147e-15	126.27	101.68	126.27	S	ERPGS(1)GGEGQHISDREQDR	ERPGS(53)GGEGQHIS(-53)DREQDR	5	4	-2.3742	2245	4457	4457	F2	18707	0.34256	0.31452	0.14251	0.20041	0.34	0.31	0.18	0.17	0.325	0.02	0.0615	0.175	0.01	0.0571	0.539	0.000288062	0.00820458	down
962	XP_031585778.1	reticulophagy regulator 3 [Oreochromis aureus]	518	31	0.865549	8.60837	0.00414657	77.124	43.895	77.124	S	S(0.015)CS(0.866)S(0.119)ERDGQVR	S(-18)CS(8.6)S(-8.6)ERDGQVR	3	2	-0.61393	8061	16443	16443	F2	13726	0.33738	0.32282	0.14279	0.19701	0.33	0.32	0.18	0.17	0.325	0.01	0.0308	0.175	0.01	0.0571	0.538	5.93823e-05	0.00345266	down
978	XP_039466610.1	ADP-ribosylation factor-binding protein GGA3 isoform X3 [Oreochromis aureus]	535	87	0.978353	16.7252	0.0061478	49.929	28.976	49.929	S	T(0.001)LIPS(0.978)PPT(0.021)RPK	T(-31)LIPS(17)PPT(-17)RPK	5	3	1.0384	10109	20815	20815	F5	34394	0.20795	0.17748	0.25041	0.36416	0.21	0.18	0.32	0.31	0.195	0.02	0.1026	0.315	0.01	0.0317	1.625	0.00178675	0.0189864	up
1017	XP_039468363.1	cyclin-dependent kinase 18 isoform X2 [Oreochromis aureus]	557	128	0.795145	5.88999	0.000591527	72.175	39.551	72.175	S	RAS(0.795)LS(0.205)DIGFGK	RAS(5.9)LS(-5.9)DIGFGK	3	3	3.2568	7131	14406	14406	F4	40224	0.18354	0.19412	0.21428	0.40805	0.18	0.19	0.27	0.35	0.185	0.01	0.0541	0.31	0.06	0.1935	1.677	0.00694992	0.0372173	up
1018	XP_039468363.1	cyclin-dependent kinase 18 isoform X2 [Oreochromis aureus]	557	12	0.999765	36.2917	0.000716953	87.568	59.391	87.568	S	RFS(1)LSVPR	RFS(36)LS(-36)VPR	3	3	-0.83852	7237	14642	14642	F5	36047	0.20972	0.16771	0.22305	0.39953	0.21	0.17	0.28	0.34	0.19	0.03	0.1579	0.31	0.04	0.1290	1.65	0.00965009	0.0458067	up
1021	XP_031586189.2	coiled-coil domain-containing protein 93 [Oreochromis aureus]	560	15	0.53531	0.614436	1.5056e-41	146.26	116.81	146.26	S	T(0.465)GS(0.535)KIGAQYDQDGNLIQVETREDEEQR	T(-0.61)GS(0.61)KIGAQY(-54)DQDGNLIQVET(-130)REDEEQR	3	4	-0.61894	9985	20560;20561	20560	F3	43229	0.30161	0.34414	0.14981	0.20445	0.3	0.34	0.19	0.18	0.32	0.03	0.0938	0.185	0.01	0.0541	0.58	0.000809635	0.0129703	down
1024	XP_031586191.1	nuclear ubiquitous casein and cyclin-dependent kinase substrate 1a [Oreochromis aureus]	561	292	0.999999	62.5824	2.81166e-16	87.659	84.897	74.474	S	EATGGEEEEEDEEEEDGS(1)EEEAPS(1)GED	EAT(-63)GGEEEEEDEEEEDGS(63)EEEAPS(74)GED	18	3	-1.3698	1803	3598;3599	3599	F5	25889	0.45425	0.36779	0.50353	0.67444	0.45	0.36	0.63	0.58	0.405	0.06	0.1481	0.605	0.04	0.0661	1.512	0.00961966	0.0457468	up
1034	XP_039467315.1	COP9 signalosome complex subunit 1 isoform X2 [Oreochromis aureus]	562	460	0.990958	20.665	0.00242328	58.995	41.969	58.995	S	EGS(0.991)QGELT(0.009)PANSQTR	EGS(21)QGELT(-21)PANS(-34)QT(-37)R	3	2	1.9532	1967	3947	3947	F2	26334	0.29045	0.37439	0.12873	0.20643	0.29	0.37	0.16	0.18	0.33	0.06	0.1818	0.17	0.01	0.0588	0.523	0.0035638	0.0257557	down
1086	XP_039462547.1	FERM, ARHGEF and pleckstrin domain-containing protein 2 isoform X3 [Oreochromis aureus]	573	384	0.9988	29.2048	0.0202263	63.426	26.352	63.426	S	S(0.999)LAT(0.001)DVPK	S(29)LAT(-29)DVPK	1	2	0.96756	8663;8664	17666	17666	F3	36638	0.30754	0.32135	0.13523	0.23588	0.3	0.32	0.17	0.2	0.31	0.01	0.0323	0.185	0.02	0.1081	0.597	0.00197923	0.0202228	down
1107	XP_031586535.1	APC membrane recruitment protein 1-like [Oreochromis aureus]	588	162	0.999358	31.9192	0.0061808	72.643	34.557	72.643	S	S(0.001)LFHS(0.999)FK	S(-32)LFHS(32)FK	5	3	2.8392	8693	17711	17711	F5	37736	0.17529	0.14725	0.27459	0.40287	0.17	0.15	0.35	0.35	0.16	0.01	0.0625	0.35	0	0	2.196	0.000212535	0.00693801	up
1114	XP_039474176.1	acetyl-CoA carboxylase 1 isoform X1 [Oreochromis aureus]	590	327	1	62.0552	9.0653e-17	131.32	111.02	62.055	S	VNS(1)ADDFPNLFR	VNS(62)ADDFPNLFR	3	3	-0.96968	5073;11008	10275;10276;10277;10278;10279;22667;22668;22669	22669	F5	48123	0.21382	0.18367	0.24919	0.36653	0.21	0.18	0.31	0.32	0.195	0.02	0.1026	0.315	0.01	0.0317	1.625	0.00178675	0.0189864	up
1130	XP_039474176.1	acetyl-CoA carboxylase 1 isoform X1 [Oreochromis aureus]	590	79	0.533445	0.957072	2.56962e-05	95.573	61.707	95.573	S	S(0.039)S(0.533)MS(0.428)GLHLVK	S(-11)S(0.96)MS(-0.96)GLHLVK	2	2	2.5329	9292	19069	19069	F5	34978	0.18308	0.1944	0.25526	0.36726	0.18	0.19	0.32	0.32	0.185	0.01	0.0541	0.32	0	0	1.731	5.14297e-05	0.00312764	up
1157	XP_039467741.1	intersectin-2b isoform X2 [Oreochromis aureus]	610	1041	0.999929	41.4984	5.93188e-05	108.63	94.769	108.63	S	LPLQSQLS(1)NALK	LPLQS(-41)QLS(41)NALK	8	3	1.5587	5616	11284;11285	11284	F5	45422	0.30543	0.30653	0.15552	0.23252	0.3	0.3	0.2	0.2	0.3	0	0	0.2	0	0	0.667	3.00672e-11	1.65455e-08	down
1193	XP_039458029.1	ran-binding protein 3b isoform X4 [Oreochromis aureus]	634	32	0.848402	7.51968	2.5296e-19	104.48	95.937	104.48	S	S(0.001)AEGS(0.848)S(0.15)AEDGEDS(1)DKDEGSYTPPVKR	S(-28)AEGS(7.5)S(-7.5)AEDGEDS(38)DKDEGS(-38)Y(-51)T(-45)PPVKR	5	4	-1.2355	7928	16184	16184	F3	32655	0.19526	0.19072	0.2612	0.35282	0.19	0.19	0.33	0.3	0.19	0	0	0.315	0.02	0.0635	1.658	0.000354702	0.00940266	up
1194	XP_039458029.1	ran-binding protein 3b isoform X4 [Oreochromis aureus]	634	40	0.999791	38.0212	2.5296e-19	104.48	95.937	104.48	S	S(0.001)AEGS(0.848)S(0.15)AEDGEDS(1)DKDEGSYTPPVKR	S(-28)AEGS(7.5)S(-7.5)AEDGEDS(38)DKDEGS(-38)Y(-51)T(-45)PPVKR	13	4	-1.2355	7928	16184	16184	F3	32655	0.19526	0.19072	0.2612	0.35282	0.19	0.19	0.33	0.3	0.19	0	0	0.315	0.02	0.0635	1.658	0.000354702	0.00940266	up
1274	XP_031587321.1	cytosolic 10-formyltetrahydrofolate dehydrogenase isoform X1 [Oreochromis aureus]	666	370	0.814201	6.41689	1.92137e-21	136.59	113.03	136.59	S	AS(0.186)S(0.814)CQLQNEDVYMNTTFK	AS(-6.4)S(6.4)CQLQNEDVY(-110)MNT(-120)T(-130)FK	3	3	-1.047	854	1858;1859	1859	F5	41904	0.18624	0.21431	0.23431	0.36513	0.18	0.21	0.29	0.31	0.195	0.02	0.1026	0.3	0.01	0.0333	1.548	0.00295484	0.0233414	up
1331	XP_031587630.1	uncharacterized protein C9orf85 homolog [Oreochromis aureus]	700	182	0.99736	25.7732	0.00327015	47.082	31.816	47.082	S	S(0.003)AVLPDLS(0.997)PINIKD	S(-26)AVLPDLS(26)PINIKD	8	3	0.67466	8050	16416	16416	F4	50936	0.1841	0.15392	0.28812	0.37386	0.18	0.15	0.36	0.32	0.165	0.02	0.1212	0.34	0.03	0.0882	2.078	0.00138193	0.0168722	up
1332	XP_031587666.1	apoptosis inhibitor 5 [Oreochromis aureus]	703	474	0.999554	33.5072	0.00719627	66.595	39.993	66.595	S	KQIS(1)PQSR	KQIS(34)PQS(-34)R	4	2	1.7132	4891	9893;9894	9893	F3	19857	0.21537	0.16666	0.287	0.33465	0.21	0.16	0.36	0.29	0.185	0.04	0.2162	0.325	0.05	0.1538	1.789	0.0109663	0.047895	up
1333	XP_031587666.1	apoptosis inhibitor 5 [Oreochromis aureus]	703	459	0.981316	17.204	8.8466e-06	112.55	75.912	97.836	S	RPS(0.981)T(0.019)EEMGSGGSTK	RPS(17)T(-17)EEMGS(-56)GGS(-78)T(-82)K	3	2	-1.0501	7623	15514;15515;15516;15518;15519;15520;15521;15522;15524	15515	F2	17596	0.39104	0.36595	0.11101	0.16238	0.39	0.36	0.14	0.14	0.375	0.02	0.0533	0.14	0	0	0.374	2.8701e-05	0.00191413	down
1334	XP_031587678.1	nucleobindin-2b [Oreochromis aureus]	704	87	1	44.2518	1.39374e-20	44.252	24.862	44.252	S	QGKLS(1)KELNFVQHNFR	QGKLS(44)KELNFVQHNFR	5	4	3.263	6718	13457	13457	F6	45855	0.20198	0.19533	0.21366	0.38902	0.2	0.19	0.27	0.33	0.195	0.01	0.0513	0.3	0.04	0.1333	1.539	0.00569245	0.0334003	up
1335	XP_031587678.1	nucleobindin-2b [Oreochromis aureus]	704	365	1	49.4629	0.00224133	49.463	30.392	49.463	S	S(1)AELQKEREELER	S(49)AELQKEREELER	1	4	1.0801	7932;7933	16191;16192	16192	F2	38237	0.16767	0.19625	0.25264	0.38344	0.17	0.19	0.32	0.33	0.18	0.01	0.0556	0.325	0.01	0.0308	1.811	0.000387382	0.00940266	up
1358	XP_031587760.1	uncharacterized protein C11orf96 homolog [Oreochromis aureus]	716	87	0.999873	38.9465	2.98541e-05	86.288	65.289	57.267	S	SFLQS(1)LENLRR	S(-39)FLQS(39)LENLRR	5	3	-3.0473	8323;8324	16988;16989	16989	F6	45028	0.30123	0.37994	0.12705	0.19178	0.3	0.38	0.16	0.17	0.34	0.06	0.1765	0.165	0.01	0.0606	0.492	0.00203582	0.0206097	down
1371	XP_031587832.1	sorting nexin-17 [Oreochromis aureus]	723	409	0.985959	18.4647	0.00293789	101.3	62.992	101.3	S	S(0.014)DS(0.986)QQAVK	S(-18)DS(18)QQAVK	3	2	3.9883	8164	16701;16702	16701	F2	19371	0.1889	0.20477	0.28964	0.3167	0.19	0.2	0.36	0.27	0.195	0.01	0.0513	0.315	0.06	0.1905	1.617	0.0114474	0.0481917	up
1396	XP_031587953.1	DNA mismatch repair protein Msh6 isoform X2 [Oreochromis aureus]	735	41	0.56228	2.09166	1.94931e-15	132.14	111.76	132.14	S	S(0.09)NS(0.562)S(0.347)PKEQAQQTPQQTK	S(-7.9)NS(2.1)S(-2.1)PKEQAQQT(-89)PQQT(-130)K	3	4	1.2331	8892	18245	18245	F3	23500	0.21535	0.18921	0.22206	0.37338	0.21	0.19	0.28	0.32	0.2	0.01	0.05	0.3	0.03	0.1000	1.504	0.00354841	0.0256685	up
1473	XP_039456920.1	tensin-3 isoform X2 [Oreochromis aureus]	766	596	0.817819	6.56256	3.46828e-09	85.855	72.625	85.855	S	S(0.818)S(0.18)PGY(0.002)SPSSPSQHGHLYK	S(6.6)S(-6.6)PGY(-27)S(-38)PS(-57)S(-65)PS(-72)QHGHLY(-84)K	1	4	-1.4344	9312	19112	19112	F4	27434	0.19139	0.18476	0.27967	0.34417	0.19	0.18	0.35	0.3	0.185	0.01	0.0541	0.325	0.04	0.1231	1.758	0.00127261	0.0165611	up
1485	XP_039473192.1	serine/threonine-protein kinase OSR1b isoform X2 [Oreochromis aureus]	775	269	0.5	0	0.00202121	77.192	55.106	77.192	S	RVPGS(0.5)S(0.5)GR	RVPGS(0)S(0)GR	6	3	0.77126	7846	15975	15975	F3	14620	0.168	0.10874	0.28918	0.43409	0.17	0.11	0.36	0.37	0.14	0.04	0.2857	0.365	0.01	0.0274	2.733	0.00439473	0.0299354	up
1485	XP_031612865.1	serine/threonine-protein kinase OSR1-like [Oreochromis aureus]	3082	325	0.5	0	0.00202121	77.192	55.106	77.192	S	RVPGS(0.5)S(0.5)GR	RVPGS(0)S(0)GR	6	3	0.77126	7846	15975	15975	F3	14620	0.168	0.10874	0.28918	0.43409	0.17	0.11	0.36	0.37	0.14	0.04	0.2857	0.365	0.01	0.0274	2.733	0.00439473	0.0299354	up
1487	XP_031588378.1	40S ribosomal protein S28 [Oreochromis aureus]	779	23	0.947853	12.5952	8.332e-11	125.03	95.499	125.03	S	T(0.052)GS(0.948)QGQCTQVR	T(-13)GS(13)QGQCT(-79)QVR	3	2	-0.34585	9992	20580	20580	F2	16046	0.44932	0.32111	0.079599	0.14996	0.44	0.32	0.1	0.13	0.38	0.08	0.2105	0.115	0.02	0.1739	0.31	0.00212761	0.0214543	down
1490	XP_031588393.1	RNA-binding protein 33 isoform X3 [Oreochromis aureus]	781	429	1	55.8813	5.3957e-05	55.881	38.392	55.881	S	LMNS(1)PPPNFPPHHQQQAPQPK	LMNS(56)PPPNFPPHHQQQAPQPK	4	4	0.045238	5562	11185	11185	F6	31620	0.29527	0.32111	0.14933	0.23429	0.29	0.32	0.19	0.2	0.305	0.02	0.0656	0.195	0.01	0.0513	0.641	0.000801489	0.0129703	down
1493	XP_031588393.1	RNA-binding protein 33 isoform X3 [Oreochromis aureus]	781	1052	0.951582	12.9344	4.23224e-09	124.81	98.693	124.81	S	S(0.048)AS(0.952)PALAQAQGPK	S(-13)AS(13)PALAQAQGPK	3	2	0.60091	8011	16334;16335;16336	16335	F3	31742	0.36379	0.30524	0.13633	0.19234	0.36	0.3	0.17	0.17	0.33	0.04	0.1212	0.17	0	0	0.519	0.00111653	0.0159874	down
1528	XP_031588585.1	protein canopy-1 isoform X2 [Oreochromis aureus]	809	115	0.554249	1.23735	6.36912e-05	79.639	68.199	79.639	S	S(0.417)S(0.554)AS(0.023)T(0.006)DDFPDFK	S(-1.2)S(1.2)AS(-14)T(-20)DDFPDFK	2	3	-0.3729	9208	18875	18875	F3	46263	0.31711	0.48573	0.064907	0.13225	0.31	0.48	0.08	0.11	0.395	0.12	0.3038	0.095	0.02	0.2105	0.252	0.00283106	0.0230964	down
1531	XP_031588638.1	epithelial splicing regulatory protein 2 isoform X3 [Oreochromis aureus]	812	547	0.999073	30.3234	0.00334478	73.067	47.85	73.067	S	S(0.001)GLS(0.999)PPPCK	S(-30)GLS(30)PPPCK	4	2	3.3915	8394	17151	17151	F3	31877	0.20706	0.20458	0.24415	0.3442	0.2	0.2	0.31	0.3	0.2	0	0	0.305	0.01	0.0328	1.525	2.48754e-05	0.00172649	up
1588	XP_031588920.1	death-inducer obliterator 1 isoform X1 [Oreochromis aureus]	843	482	0.969038	14.9862	2.62095e-38	151.8	120.45	151.8	S	ASNAGGDS(0.031)S(0.969)PSAVR	AS(-91)NAGGDS(-15)S(15)PS(-36)AVR	9	2	0.31769	834	1822	1822	F2	18446	0.15859	0.21341	0.25265	0.37535	0.16	0.21	0.32	0.32	0.185	0.04	0.2162	0.32	0	0	1.762	0.00574506	0.0335562	up
1589	XP_031588920.1	death-inducer obliterator 1 isoform X1 [Oreochromis aureus]	843	2128	0.816982	6.49719	0.000383129	65.477	50.09	65.477	S	FT(0.183)S(0.817)PPPPPFNFPGNR	FT(-6.5)S(6.5)PPPPPFNFPGNR	3	3	-0.22602	2716	5293	5293	F2	50654	0.33885	0.31494	0.14605	0.20016	0.34	0.31	0.18	0.17	0.325	0.02	0.0615	0.175	0.01	0.0571	0.539	0.000288062	0.00820458	down
1603	XP_031589008.1	interferon alpha/beta receptor 2-like isoform X2 [Oreochromis aureus]	853	259	0.996046	24.0129	4.30887e-11	130.41	101.04	130.41	S	S(0.996)LS(0.004)YVILYR	S(24)LS(-24)Y(-66)VILY(-110)R	1	2	-0.83564	8806	17965	17965	F6	47131	0.083245	0.073468	0.45306	0.39023	0.08	0.07	0.57	0.34	0.075	0.01	0.1333	0.455	0.16	0.3516	6.094	0.00141077	0.0168973	up
1649	XP_031589320.1	serine and arginine rich splicing factor 5a isoform X2 [Oreochromis aureus]	880	127	0.711254	3.91509	0.00241994	76.255	40.926	76.255	S	LVVENLS(0.289)S(0.711)R	LVVENLS(-3.9)S(3.9)R	8	2	-0.64976	5905	11814;11815	11815	F3	42861	0.28125	0.34006	0.13621	0.24249	0.28	0.34	0.17	0.21	0.31	0.04	0.129	0.19	0.03	0.1579	0.619	0.00963606	0.0457965	down
1654	XP_031589336.1	thyroid receptor-interacting protein 11 [Oreochromis aureus]	884	1925	1	73.3597	8.20621e-05	105.66	72.819	73.36	S	AGDS(1)NPFLAPR	AGDS(73)NPFLAPR	4	2	-4.4562	348	746;747	747	F6	37151	0.21045	0.21085	0.27423	0.32143	0.21	0.21	0.35	0.28	0.21	0	0	0.315	0.05	0.1587	1.5	0.00851386	0.0424261	up
1662	XP_031589346.1	RNA-binding protein 25 isoform X2 [Oreochromis aureus]	886	692	1	68.7322	1.70278e-28	136.14	108.42	136.14	S	LVPLDYGDDEKS(1)LGLDGAEISGAK	LVPLDY(-69)GDDEKS(69)LGLDGAEIS(-97)GAK	12	4	0.83055	5881	11778	11778	F4	50239	0.33847	0.31593	0.15615	0.18945	0.34	0.31	0.2	0.16	0.325	0.02	0.0615	0.18	0.03	0.1667	0.555	0.00333172	0.0256685	down
1694	XP_031589544.1	RNA-binding protein 8A isoform X2 [Oreochromis aureus]	904	40	1	60.064	7.47545e-05	91.095	76.23	60.064	S	GFGS(1)EEGAR	GFGS(60)EEGAR	4	2	-1.1453	2967	5773;5774;5775	5775	F6	22848	0.34191	0.29264	0.14006	0.22538	0.34	0.29	0.18	0.19	0.315	0.04	0.127	0.185	0.01	0.0541	0.591	0.00165604	0.018029	down
1702	XP_031589637.1	formin-binding protein 1-like isoform X2 [Oreochromis aureus]	912	294	0.930877	11.32	2.38855e-60	169.58	137.57	85.536	S	T(0.069)GS(0.931)DGTISNTPK	T(-11)GS(11)DGT(-33)IS(-49)NT(-57)PK	3	2	0.67601	9978	20547;20549	20547	F2	27674	0.29881	0.31401	0.15653	0.23064	0.3	0.31	0.2	0.2	0.305	0.01	0.0328	0.2	0	0	0.656	2.66264e-05	0.00181531	down
1713	XP_031589781.1	betaine--homocysteine S-methyltransferase 1-like [Oreochromis aureus]	927	385	0.5	0	2.23827e-110	192.55	163.97	192.55	S	EAT(0.5)S(0.5)KEQLEALFDK	EAT(0)S(0)KEQLEALFDK	4	4	1.1711	1807	3605	3605	F4	47977	0.16005	0.15532	0.33785	0.34678	0.16	0.15	0.43	0.3	0.155	0.01	0.0645	0.365	0.09	0.2466	2.357	0.00413318	0.0285323	up
1730	XP_031589814.1	keratin, type I cytoskeletal 18 [Oreochromis aureus]	933	10	0.984227	21.4296	0.000345833	71.531	61.245	71.531	S	HS(0.001)T(0.003)Y(0.009)S(0.984)VRS(0.772)S(0.176)T(0.042)S(0.011)S(0.003)R	HS(-33)T(-26)Y(-21)S(21)VRS(6.5)S(-6.5)T(-13)S(-19)S(-25)R	5	2	0.067937	4003;4004	8030;8031	8030	F2	18020	0.12359	0.158	0.22536	0.49305	0.12	0.16	0.28	0.42	0.14	0.03	0.2143	0.35	0.10	0.2857	2.552	0.00803007	0.0404073	up
1731	XP_031589814.1	keratin, type I cytoskeletal 18 [Oreochromis aureus]	933	13	0.771829	6.49307	0.000345833	71.531	61.245	71.531	S	HS(0.001)T(0.003)Y(0.009)S(0.984)VRS(0.772)S(0.176)T(0.042)S(0.011)S(0.003)R	HS(-33)T(-26)Y(-21)S(21)VRS(6.5)S(-6.5)T(-13)S(-19)S(-25)R	8	2	0.067937	4004	8030;8031	8030	F2	18020	0.12359	0.158	0.22536	0.49305	0.12	0.16	0.28	0.42	0.14	0.03	0.2143	0.35	0.10	0.2857	2.552	0.00803007	0.0404073	up
1734	XP_031589814.1	keratin, type I cytoskeletal 18 [Oreochromis aureus]	933	34	0.78349	8.59585	6.05285e-06	111.12	84.997	111.12	S	S(0.783)S(0.108)S(0.108)IHGGAGGTK	S(8.6)S(-8.6)S(-8.6)IHGGAGGT(-110)K	1	3	2.5451	9392	19276;19277;19278;19281;19284;19289	19276	F1	16693	0.15077	0.18199	0.27824	0.42171	0.15	0.18	0.35	0.36	0.165	0.02	0.1212	0.355	0.01	0.0282	2.169	0.000717727	0.0124694	up
1736	XP_031589814.1	keratin, type I cytoskeletal 18 [Oreochromis aureus]	933	36	0.973077	16.2351	5.56031e-107	189.3	155.41	110.92	S	S(0.004)S(0.023)S(0.973)IHGGAGGTK	S(-24)S(-16)S(16)IHGGAGGT(-73)K	3	2	2.9319	9392	19279;19280;19282;19286;19288;19291;19292;19294	19292	F5	15192	0.14583	0.15322	0.27564	0.42418	0.14	0.15	0.35	0.37	0.145	0.01	0.069	0.36	0.01	0.0278	2.486	4.90851e-05	0.00302521	up
1744	XP_039460277.1	tensin-2 isoform X5 [Oreochromis aureus]	934	797	0.595576	5.2127	0.00037278	94.616	77.18	94.616	S	YSSS(0.004)S(0.11)S(0.596)GY(0.179)QT(0.11)PR	Y(-71)S(-62)S(-42)S(-22)S(-7.3)S(5.2)GY(-5.2)QT(-7.3)PR	6	2	-2.1753	11551	23747	23747	F3	21074	0.28144	0.33656	0.13781	0.24419	0.28	0.33	0.17	0.21	0.305	0.04	0.1311	0.19	0.03	0.1579	0.627	0.0086369	0.0425708	down
1769	XP_031589959.1	sphingosine kinase 2 [Oreochromis aureus]	943	414	0.835609	7.14735	0.0348583	42.464	29.833	42.464	S	T(0.161)CS(0.836)DMGIS(0.003)EQR	T(-7.1)CS(7.1)DMGIS(-24)EQR	3	2	0.74495	9829	20249	20249	F2	22137	0.19944	0.19405	0.2216	0.38491	0.2	0.19	0.28	0.33	0.195	0.01	0.0513	0.305	0.04	0.1311	1.565	0.00294947	0.0233292	up
1803	XP_031590140.1	SUMO-activating enzyme subunit 2 [Oreochromis aureus]	963	601	0.611259	7.18509	1.1565e-06	53.968	38.652	53.968	S	APSEDDDIMIVDS(0.101)DEEDGAAS(0.117)S(0.117)S(0.611)AAAAT(0.042)S(0.01)GT(0.002)K	APS(-41)EDDDIMIVDS(-7.8)DEEDGAAS(-7.2)S(-7.2)S(7.2)AAAAT(-12)S(-18)GT(-26)K	23	4	0.61703	711	1563	1563	F2	42181	0.2749	0.34157	0.16674	0.21679	0.27	0.34	0.21	0.19	0.305	0.05	0.1639	0.2	0.01	0.0500	0.665	0.0105079	0.0476756	down
1808	XP_031590197.1	vesicle-associated membrane protein 8 isoform X2 [Oreochromis aureus]	967	61	0.72492	4.20833	4.10162e-06	85.636	70.664	85.636	S	TDDLQAS(0.275)ADS(0.725)FQR	T(-61)DDLQAS(-4.2)ADS(4.2)FQR	10	3	-1.5326	9836	20276	20276	F2	37518	0.33091	0.28538	0.17671	0.207	0.33	0.28	0.22	0.18	0.305	0.04	0.1311	0.2	0.03	0.1500	0.66	0.0110349	0.047895	down
1820	XP_031590276.1	low density lipoprotein receptor adapter protein 1a [Oreochromis aureus]	976	186	0.829799	6.88011	8.03436e-06	95.554	61.277	92.39	S	S(0.17)GS(0.83)AGEASSSSHSER	S(-6.9)GS(6.9)AGEAS(-63)S(-75)S(-79)S(-81)HS(-87)ER	3	3	0.68403	8409	17172;17173	17172	F1	10835	0.16283	0.16473	0.27424	0.39821	0.16	0.16	0.35	0.34	0.16	0	0	0.345	0.01	0.0290	2.157	2.91554e-06	0.00022239	up
1821	XP_031590276.1	low density lipoprotein receptor adapter protein 1a [Oreochromis aureus]	976	201	0.873687	8.55677	0.00707992	55.401	7.8416	55.401	S	S(0.122)NS(0.874)FGS(0.005)LK	S(-8.6)NS(8.6)FGS(-23)LK	3	3	-1.5354	8874	18205	18205	F4	34780	0.20071	0.20314	0.24241	0.35375	0.2	0.2	0.3	0.3	0.2	0	0	0.3	0	0	1.5	2.63919e-12	1.01662e-08	up
1848	XP_039456161.1	E3 ubiquitin-protein ligase MYCBP2 isoform X11 [Oreochromis aureus]	983	3412	0.99988	40.6914	0.000736119	57.616	34.737	57.616	S	VHS(1)GDAEVGSSLLR	VHS(41)GDAEVGS(-41)S(-45)LLR	3	3	-1.4421	10845	22347	22347	F3	38461	0.31255	0.30978	0.16541	0.21227	0.31	0.31	0.21	0.18	0.31	0	0	0.195	0.02	0.1026	0.629	0.00180916	0.019157	down
1853	XP_031590419.2	insulin receptor substrate 2 [Oreochromis aureus]	990	1016	0.973659	15.9043	0.0024462	69.352	28.628	69.352	S	HS(0.001)S(0.025)AS(0.974)VENVSR	HS(-29)S(-16)AS(16)VENVS(-42)R	5	2	0.11187	3985	8001	8001	F2	17401	0.34849	0.32126	0.15344	0.1768	0.35	0.32	0.19	0.15	0.335	0.02	0.0597	0.17	0.03	0.1765	0.509	0.00256199	0.0230964	down
1854	XP_039456264.1	rho guanine nucleotide exchange factor 7a isoform X1 [Oreochromis aureus]	991	672	1	95.1834	7.67801e-06	95.183	76.089	95.183	S	KQS(1)EEEFALR	KQS(95)EEEFALR	3	3	1.4412	4902	9908	9908	F3	36510	0.20621	0.19415	0.22843	0.3712	0.2	0.19	0.29	0.32	0.195	0.01	0.0513	0.305	0.02	0.0656	1.565	0.000800215	0.0129703	up
1861	XP_039471198.1	rho guanine nucleotide exchange factor 28 isoform X2 [Oreochromis aureus]	995	1438	0.888002	8.99206	0.0106863	45.014	26.234	45.014	S	LLLQDS(0.112)GRPS(0.888)PR	LLLQDS(-9)GRPS(9)PR	10	3	-0.52323	5525	11105	11105	F5	33802	0.17963	0.16475	0.31235	0.34327	0.18	0.16	0.39	0.3	0.17	0.01	0.0588	0.345	0.06	0.1739	2.037	0.00348718	0.0256685	up
1869	XP_031590443.1	disabled homolog 2 isoform X1 [Oreochromis aureus]	997	412	0.783427	6.69258	1.86927e-26	121.82	99.509	121.82	S	NPFFDS(0.048)LKT(0.168)S(0.783)PVSNEMT(0.001)HHPEPPVTHSK	NPFFDS(-12)LKT(-6.7)S(6.7)PVS(-39)NEMT(-31)HHPEPPVT(-91)HS(-100)K	10	5	-0.57798	6384;10386	12782	12782	F6	37065	0.47393	0.3857	0.059334	0.081033	0.47	0.38	0.07	0.07	0.425	0.06	0.1412	0.07	0	0	0.166	8.53637e-05	0.00450439	down
1909	XP_039454762.1	spermatogenesis-defective protein 39 homolog [Oreochromis aureus]	1021	101	0.851772	7.59742	8.04555e-05	107.82	84.589	107.82	S	S(0.852)QS(0.148)GYSLSSLFK	S(7.6)QS(-7.6)GY(-67)S(-39)LS(-87)S(-94)LFK	1	3	1.7189	9087	18609;18610	18609	F2	51105	0.15836	0.20735	0.28751	0.34677	0.16	0.21	0.36	0.3	0.185	0.04	0.2162	0.33	0.04	0.1212	1.817	0.00852772	0.0424426	up
1914	XP_031590686.1	DENN domain-containing protein 5B-like isoform X4 [Oreochromis aureus]	1023	417	0.968584	15.3018	0.000349318	78.964	43.519	78.964	S	S(0.969)S(0.029)PGS(0.002)TSSTPGR	S(15)S(-15)PGS(-26)T(-36)S(-40)S(-41)T(-46)PGR	1	2	1.8982	9310;10319	19107	19107	F2	14330	0.13726	0.15872	0.30073	0.40329	0.14	0.16	0.38	0.35	0.15	0.01	0.0667	0.365	0.02	0.0548	2.444	0.000285664	0.00820458	up
1915	XP_031590686.1	DENN domain-containing protein 5B-like isoform X4 [Oreochromis aureus]	1023	418	0.676956	3.70205	0.0361069	41.227	11.754	41.227	S	S(0.289)S(0.677)PGS(0.023)T(0.006)S(0.002)S(0.002)T(0.002)PGR	S(-3.7)S(3.7)PGS(-15)T(-21)S(-25)S(-26)T(-26)PGR	2	2	0.90869	9310;10319	19106	19106	F2	13746	0.13091	0.14936	0.28423	0.4355	0.13	0.15	0.36	0.37	0.14	0.01	0.0714	0.365	0.01	0.0274	2.621	0.000183337	0.00684975	up
1932	XP_039476211.1	rab-like protein 6 [Oreochromis aureus]	1031	428	0.999887	40.6255	1.16034e-06	88.338	62.219	88.338	S	SFLEDS(1)LPSK	S(-46)FLEDS(41)LPS(-41)K	6	3	-1.0073	8319	16984	16984	F4	44423	0.36482	0.29718	0.12721	0.2108	0.36	0.29	0.16	0.18	0.325	0.05	0.1538	0.17	0.01	0.0588	0.529	0.00287856	0.0230964	down
2000	XP_031591293.1	nucleoprotein TPR-like isoform X2 [Oreochromis aureus]	1068	935	0.62499	2.42424	2.16281e-06	61.963	27.305	61.963	S	VRS(0.358)PVPAAS(0.625)QLT(0.014)S(0.003)QSEQELLEVK	VRS(-2.4)PVPAAS(2.4)QLT(-17)S(-23)QS(-33)EQELLEVK	9	4	0.50373	11096	22847	22847	F4	49067	0.29569	0.34427	0.15322	0.20682	0.29	0.34	0.19	0.18	0.315	0.04	0.127	0.185	0.01	0.0541	0.591	0.00165604	0.018029	down
2025	XP_031591408.1	neurofilament, medium polypeptide a [Oreochromis aureus]	1076	745	0.538235	0.680077	0.00569539	52.555	21.727	52.555	S	S(0.46)ES(0.538)PKPES(0.002)PK	S(-0.68)ES(0.68)PKPES(-25)PK	3	3	1.5183	8274	16905	16905	F3	22335	0.20981	0.17102	0.22068	0.39848	0.21	0.17	0.28	0.34	0.19	0.03	0.1579	0.31	0.04	0.1290	1.65	0.00965009	0.0458067	up
2026	XP_031591408.1	neurofilament, medium polypeptide a [Oreochromis aureus]	1076	725	0.891727	9.15557	0.00341245	65.295	37.867	65.295	S	S(0.109)ES(0.892)PRPAS(1)PK	S(-9.2)ES(9.2)PRPAS(34)PK	3	2	2.2588	8276	16908	16908	F2	19766	0.20424	0.15918	0.23367	0.40291	0.2	0.16	0.29	0.35	0.18	0.03	0.1667	0.32	0.04	0.1250	1.8	0.00637429	0.0357406	up
2034	XP_031591445.1	active breakpoint cluster region-related protein isoform X1 [Oreochromis aureus]	1078	890	1	51.013	0.00179722	59.57	19.909	51.013	S	KQS(1)GVFGVK	KQS(51)GVFGVK	3	3	-0.20855	4904	9910;9911;9912	9912	F5	30939	0.36955	0.26977	0.14953	0.21115	0.37	0.27	0.19	0.18	0.32	0.07	0.2188	0.185	0.01	0.0541	0.593	0.0102297	0.0474183	down
2034	XP_031598649.1	PH_BCR_vertebrate and RhoGAP_Bcr domain-containing protein isoform X1 [Oreochromis aureus]	1747	1068	1	51.013	0.00179722	59.57	19.909	51.013	S	KQS(1)GVFGVK	KQS(51)GVFGVK	3	3	-0.20855	4904	9910;9911;9912	9912	F5	30939	0.36955	0.26977	0.14953	0.21115	0.37	0.27	0.19	0.18	0.32	0.07	0.2188	0.185	0.01	0.0541	0.593	0.0102297	0.0474183	down
2039	XP_039458531.1	period circadian protein homolog 2 isoform X5 [Oreochromis aureus]	1082	651	1	51.8194	0.000941551	51.819	41.623	51.819	S	QKEQIGS(1)DVAPAVRPK	QKEQIGS(52)DVAPAVRPK	7	4	3.2678	6787	13604	13604	F4	32047	0.1941	0.18206	0.29825	0.32558	0.19	0.18	0.38	0.28	0.185	0.01	0.0541	0.33	0.07	0.2121	1.785	0.00791661	0.0399932	up
2051	XP_039457924.1	eukaryotic translation initiation factor 4 gamma 1a isoform X4 [Oreochromis aureus]	1087	1086	0.880826	11.571	0.000833472	44.615	25.734	44.615	S	GS(0.881)S(0.055)GGT(0.061)GAKPAS(0.003)GDQDSGRPGTSTLNR	GS(12)S(-12)GGT(-12)GAKPAS(-25)GDQDS(-36)GRPGT(-44)S(-44)T(-44)LNR	2	4	-2.0579	3499	6999	6999	F3	23006	0.17654	0.20508	0.22148	0.3969	0.17	0.2	0.28	0.34	0.185	0.02	0.1081	0.31	0.04	0.1290	1.687	0.00588191	0.0338468	up
2100	XP_031591666.1	thyroid hormone receptor-associated protein 3b isoform X2 [Oreochromis aureus]	1109	245	0.999983	46.8129	0.00182229	104.84	95.553	104.84	S	WIDYDAS(1)PKPT(0.034)S(0.715)PET(0.251)K	WIDY(-47)DAS(47)PKPT(-13)S(4.6)PET(-4.6)K	7	4	0.83946	11324	23279;23280	23280	F3	45676	0.35844	0.29856	0.13701	0.20598	0.35	0.3	0.17	0.18	0.325	0.04	0.1231	0.175	0.01	0.0571	0.542	0.00098523	0.0152108	down
2101	XP_031591666.1	thyroid hormone receptor-associated protein 3b isoform X2 [Oreochromis aureus]	1109	250	0.715212	4.55519	0.00182229	104.84	95.553	104.84	S	WIDYDAS(1)PKPT(0.034)S(0.715)PET(0.251)K	WIDY(-47)DAS(47)PKPT(-13)S(4.6)PET(-4.6)K	12	4	0.83946	11324	23279;23280	23280	F3	45676	0.35844	0.29856	0.13701	0.20598	0.35	0.3	0.17	0.18	0.325	0.04	0.1231	0.175	0.01	0.0571	0.542	0.00098523	0.0152108	down
2107	XP_031591680.2	protein MTSS 1 isoform X1 [Oreochromis aureus]	1111	272	0.83873	7.45388	0.00133513	66.285	38.272	66.285	S	KS(0.151)S(0.839)IS(0.007)S(0.003)YQSGSVR	KS(-7.5)S(7.5)IS(-20)S(-25)Y(-43)QS(-39)GS(-46)VR	3	2	1.7915	4995	10099;10100;10101	10101	F5	25877	0.20452	0.1783	0.26999	0.35077	0.2	0.18	0.34	0.3	0.19	0.01	0.0526	0.32	0.03	0.0938	1.689	0.00159815	0.0175637	up
2116	XP_031591722.1	CCAAT/enhancer-binding protein beta [Oreochromis aureus]	1114	154	1	78.3239	1.16424e-07	105.96	62.16	78.324	S	AAAAAVAADREDS(1)QEDAK	AAAAAVAADREDS(78)QEDAK	13	3	0.9244	1	1;2	2	F3	33276	0.33898	0.28589	0.1637	0.21142	0.34	0.28	0.21	0.18	0.31	0.04	0.129	0.195	0.02	0.1026	0.635	0.00759248	0.0389652	down
2117	XP_031591722.1	CCAAT/enhancer-binding protein beta [Oreochromis aureus]	1114	22	0.992204	23.6061	0.00125212	51.405	35.267	51.405	S	DS(0.004)VIS(0.992)PIGGGS(0.003)Y(0.001)WR	DS(-24)VIS(24)PIGGGS(-26)Y(-31)WR	5	2	0.059415	1584	3192;3193	3193	F5	44854	0.34121	0.27728	0.15617	0.22535	0.34	0.27	0.2	0.19	0.305	0.05	0.1639	0.195	0.01	0.0513	0.648	0.00753411	0.0389652	down
2119	XP_031591722.1	CCAAT/enhancer-binding protein beta [Oreochromis aureus]	1114	207	0.543781	0.805618	0.00403726	56.087	43.131	51.013	S	S(0.452)RS(0.544)PS(0.004)HS(0.001)GK	S(-0.81)RS(0.81)PS(-22)HS(-28)GK	3	4	0.85759	9174	18804	18804	F3	8469	0.53044	0.32679	0.070848	0.071915	0.53	0.32	0.09	0.06	0.425	0.15	0.3529	0.075	0.02	0.2667	0.188	0.00270646	0.0230964	down
2123	XP_031591722.1	CCAAT/enhancer-binding protein beta [Oreochromis aureus]	1114	133	0.99868	29.1223	0.000478142	65.773	40.114	65.467	S	VDSVLS(0.999)PELGS(0.001)R	VDS(-40)VLS(29)PELGS(-29)R	6	3	-0.98434	10685	22030;22031	22031	F3	48489	0.33137	0.34789	0.12687	0.19387	0.33	0.34	0.16	0.17	0.335	0.01	0.0299	0.165	0.01	0.0606	0.493	4.4228e-05	0.00274784	down
2175	XP_039477816.1	tight junction-associated protein 1 isoform X3 [Oreochromis aureus]	1137	486	0.901298	9.60635	2.48739e-05	88.092	54.226	88.092	S	GS(0.099)S(0.901)LDTDTDTEQR	GS(-9.6)S(9.6)LDT(-46)DT(-62)DT(-75)EQR	3	2	0.25314	3501	7001	7001	F1	21778	0.1677	0.21496	0.26239	0.35494	0.17	0.21	0.33	0.31	0.19	0.03	0.1579	0.32	0.01	0.0312	1.703	0.00370808	0.0263534	up
2180	XP_039460215.1	serine/threonine-protein kinase mTOR [Oreochromis aureus]	1141	2445	0.74693	6.65805	3.48251e-06	62.284	42.309	49.968	S	AGT(0.277)T(0.277)VPES(0.747)IHS(0.7)FIGDGLVQPEALNK	AGT(-6.7)T(-6.7)VPES(6.7)IHS(6.7)FIGDGLVQPEALNK	8	4	1.0141	407	862;863	863	F4	52299	0.3055	0.33069	0.13552	0.22829	0.3	0.33	0.17	0.2	0.315	0.02	0.0635	0.185	0.02	0.1081	0.589	0.00225797	0.0222322	down
2182	XP_031592008.1	transmembrane and coiled-coil domain-containing protein 4 [Oreochromis aureus]	1142	611	0.999991	50.6321	0.000643751	84.507	47.163	84.507	S	MSPQNNS(1)PR	MS(-51)PQNNS(51)PR	7	2	-0.30684	6153	12328	12328	F2	9791	0.20424	0.19034	0.22857	0.37686	0.2	0.19	0.29	0.32	0.195	0.01	0.0513	0.305	0.02	0.0656	1.565	0.000800215	0.0129703	up
2210	XP_039475024.1	UBX domain-containing protein 1 [Oreochromis aureus]	1159	218	0.670253	6.60617	6.15873e-38	127.17	110.77	127.17	S	FGGGAPSSTAASSQNAQPS(0.003)PS(0.146)S(0.67)PT(0.146)S(0.033)QGPPPT(0.001)KK	FGGGAPS(-100)S(-100)T(-96)AAS(-88)S(-86)QNAQPS(-23)PS(-6.6)S(6.6)PT(-6.6)S(-13)QGPPPT(-29)KK	22	4	-3.6396	2521;2522	4949;4950	4949	F4	31495	0.32197	0.29918	0.15927	0.21959	0.32	0.3	0.2	0.19	0.31	0.01	0.0323	0.195	0.01	0.0513	0.63	0.000296294	0.00821096	down
2258	XP_031592368.1	cdc42 effector protein 4a [Oreochromis aureus]	1188	106	0.981364	17.4229	5.72229e-08	87.16	62.778	87.16	S	DGALVVPGGS(0.981)PT(0.018)Y(0.001)VK	DGALVVPGGS(17)PT(-17)Y(-31)VK	10	3	1.4474	1246	2584;2585	2585	F4	42810	0.30836	0.31494	0.15942	0.21728	0.31	0.31	0.2	0.19	0.31	0	0	0.195	0.01	0.0513	0.629	6.97257e-05	0.00383691	down
2264	XP_039469393.1	spectrin beta chain, non-erythrocytic 1-like isoform X3 [Oreochromis aureus]	1193	2240	0.544435	2.74843	0	256.11	237.48	256.11	S	AHTLPATVTLT(0.005)T(0.162)ES(0.544)S(0.289)PGKR	AHT(-140)LPAT(-68)VT(-40)LT(-21)T(-5.3)ES(2.7)S(-2.7)PGKR	14	3	0.15046	443	952	952	F5	32207	0.19801	0.18203	0.25331	0.36666	0.2	0.18	0.32	0.32	0.19	0.01	0.0526	0.32	0	0	1.689	0.000430761	0.00940266	up
2285	XP_031592570.1	presenilin-2 [Oreochromis aureus]	1200	63	1	133.24	1.85216e-38	144.55	107.34	144.55	S	RPGAAAADGGGS(1)DPEVEAEEEELTLK	RPGAAAADGGGS(130)DPEVEAEEEELT(-130)LK	12	4	1.363	7563	15385	15385	F2	44596	0.17696	0.19254	0.26448	0.36602	0.18	0.19	0.33	0.32	0.185	0.01	0.0541	0.325	0.01	0.0308	1.758	7.09436e-05	0.00387624	up
2326	XP_031592816.1	L-2-hydroxyglutarate dehydrogenase, mitochondrial [Oreochromis aureus]	1227	53	0.981453	17.236	3.28156e-05	95.98	41.509	95.98	S	HPS(0.981)LS(0.019)FVLLEK	HPS(17)LS(-17)FVLLEK	3	3	-0.9905	3908	7800	7800	F6	46190	0.32409	0.37325	0.11931	0.18335	0.32	0.37	0.15	0.16	0.345	0.04	0.1159	0.155	0.01	0.0645	0.452	0.000421388	0.00940266	down
2335	XP_031592883.1	thioredoxin-related transmembrane protein 1 [Oreochromis aureus]	1235	267	1	69.7136	0.000659611	79.004	30.379	69.714	S	RGS(1)PEGRPEPR	RGS(70)PEGRPEPR	3	4	-0.14821	3467;7293	6890;6891;14800;14801;14802	14802	F4	9465	0.30365	0.32764	0.16014	0.21386	0.3	0.32	0.2	0.18	0.31	0.01	0.0323	0.19	0.01	0.0526	0.613	0.000851226	0.0134658	down
2345	XP_039458880.1	fibronectin type III domain containing 3Ba [Oreochromis aureus]	1245	253	0.878915	8.60855	0.0235933	69.198	19.071	69.198	S	LRS(0.121)S(0.879)PR	LRS(-8.6)S(8.6)PR	4	3	0.58548	5707	11434	11434	F3	13610	0.1558	0.19212	0.27121	0.38087	0.15	0.19	0.34	0.33	0.17	0.03	0.1765	0.335	0.01	0.0299	1.998	0.00215632	0.0216296	up
2420	XP_031593455.2	hyaluronan-binding protein 2 [Oreochromis aureus]	1284	58	0.823635	6.69322	0.00360996	56.359	46.127	55.261	S	HQDS(0.824)S(0.176)HPGR	HQDS(6.7)S(-6.7)HPGR	4	3	-1.5042	3924;3925	7824;7825;7826	7824	F3	4315	0.36443	0.47307	0.056219	0.10234	0.36	0.47	0.07	0.09	0.415	0.08	0.1928	0.08	0.01	0.1250	0.196	0.000574854	0.0105676	down
2421	XP_031593455.2	hyaluronan-binding protein 2 [Oreochromis aureus]	1284	59	0.598163	1.7277	0.00405438	53.569	44.614	53.569	S	HQDS(0.402)S(0.598)HPGR	HQDS(-1.7)S(1.7)HPGR	5	3	-1.4781	3924;3925	7823	7823	F2	4233	0.36076	0.45173	0.071113	0.1164	0.36	0.45	0.09	0.1	0.405	0.06	0.1481	0.095	0.01	0.1053	0.237	0.000264247	0.0076821	down
2423	XP_031593455.2	hyaluronan-binding protein 2 [Oreochromis aureus]	1284	70	0.843865	7.32772	0.0111477	49.423	34.221	49.423	S	HRDS(0.844)S(0.156)HPER	HRDS(7.3)S(-7.3)HPER	4	3	-0.090418	3943	7880	7880	F3	3365	0.35597	0.39563	0.1234	0.13889	0.35	0.39	0.16	0.12	0.37	0.03	0.0811	0.14	0.03	0.2143	0.38	0.00156946	0.0174474	down
2431	XP_031593476.1	eukaryotic translation initiation factor 3 subunit L [Oreochromis aureus]	1287	569	0.965956	14.5466	1.09943e-95	182.63	162.31	182.63	S	MSTTATTVTSGTAT(0.034)S(0.966)R	MS(-150)T(-150)T(-130)AT(-91)T(-93)VT(-69)S(-49)GT(-39)AT(-15)S(15)R	15	2	-0.81748	4811;6158	12334	12334	F3	23063	0.31294	0.38211	0.12342	0.18153	0.31	0.38	0.16	0.16	0.345	0.05	0.1449	0.16	0	0	0.469	0.000983493	0.0152108	down
2444	XP_031593577.1	ataxin-2-like protein isoform X4 [Oreochromis aureus]	1297	221	1	41.6209	0.015058	41.621	27.657	41.621	S	RVS(1)LENDEGR	RVS(42)LENDEGR	3	3	-1.0124	7856	15997	15997	F1	23069	0.30089	0.31761	0.16198	0.21952	0.3	0.31	0.2	0.19	0.305	0.01	0.0328	0.195	0.01	0.0513	0.639	0.00013465	0.00545972	down
2483	XP_031593710.2	desmoglein-2-like [Oreochromis aureus]	1309	1067	0.993906	24.5512	1.92798e-09	89.979	61.329	89.979	S	AQGFSVGS(0.001)HS(0.001)S(0.003)LGS(0.994)NEEAK	AQGFS(-34)VGS(-29)HS(-30)S(-25)LGS(25)NEEAK	14	3	0.037977	749	1650	1650	F4	34505	0.20325	0.18557	0.24324	0.36794	0.2	0.18	0.31	0.32	0.19	0.01	0.0526	0.315	0.01	0.0317	1.663	0.000535945	0.00997324	up
2544	XP_039461654.1	negative elongation factor E [Oreochromis aureus]	1344	231	0.88429	8.83451	0.0344343	63.816	23.465	63.816	S	S(0.116)DS(0.884)YPER	S(-8.8)DS(8.8)Y(-42)PER	3	2	-1.2864	8174	16736	16736	F1	17111	0.30794	0.30998	0.16687	0.2152	0.3	0.31	0.21	0.19	0.305	0.01	0.0328	0.2	0.01	0.0500	0.656	0.000798952	0.0129703	down
2564	XP_031594013.2	serine/arginine-rich splicing factor 6-like isoform X2 [Oreochromis aureus]	1350	328	0.981557	17.257	1.84303e-05	77.746	71.713	77.746	S	S(0.019)AS(0.982)RS(1)PS(0.999)PQEEECR	S(-17)AS(17)RS(35)PS(32)PQEEECR	3	2	-1.3118	8025	16362	16362	F2	17581	0.21018	0.18388	0.27884	0.3271	0.21	0.18	0.35	0.28	0.195	0.02	0.1026	0.315	0.05	0.1587	1.625	0.00891684	0.0435056	up
2565	XP_031594013.2	serine/arginine-rich splicing factor 6-like isoform X2 [Oreochromis aureus]	1350	330	0.999718	35.4085	1.84303e-05	77.746	71.713	77.746	S	S(0.019)AS(0.982)RS(1)PS(0.999)PQEEECR	S(-17)AS(17)RS(35)PS(32)PQEEECR	5	2	-1.3118	8025	16362	16362	F2	17581	0.21018	0.18388	0.27884	0.3271	0.21	0.18	0.35	0.28	0.195	0.02	0.1026	0.315	0.05	0.1587	1.625	0.00891684	0.0435056	up
2566	XP_031594013.2	serine/arginine-rich splicing factor 6-like isoform X2 [Oreochromis aureus]	1350	332	0.999438	32.4145	1.84303e-05	77.746	71.713	77.746	S	S(0.019)AS(0.982)RS(1)PS(0.999)PQEEECR	S(-17)AS(17)RS(35)PS(32)PQEEECR	7	2	-1.3118	8025	16362	16362	F2	17581	0.21018	0.18388	0.27884	0.3271	0.21	0.18	0.35	0.28	0.195	0.02	0.1026	0.315	0.05	0.1587	1.625	0.00891684	0.0435056	up
2567	XP_039460699.1	ERBB receptor feedback inhibitor 1 [Oreochromis aureus]	1351	165	0.995878	25.9928	2.43324e-05	94.569	70.348	94.569	S	AGDAGIGS(0.002)MAFS(0.996)WPS(0.003)R	AGDAGIGS(-28)MAFS(26)WPS(-26)R	12	2	-0.88649	343	738;739;740;741	741	F6	47226	0.30268	0.32427	0.14109	0.22131	0.3	0.32	0.18	0.19	0.31	0.01	0.0323	0.185	0.01	0.0541	0.597	0.000230121	0.00711988	down
2568	XP_039460699.1	ERBB receptor feedback inhibitor 1 [Oreochromis aureus]	1351	137	0.81726	6.50527	1.4583e-08	80.711	68.923	80.711	S	NS(0.183)S(0.817)KDFGQVNYAYQESSLR	NS(-6.5)S(6.5)KDFGQVNY(-70)AY(-73)QES(-78)S(-78)LR	3	3	-1.0642	6467	12929	12929	F4	40133	0.32523	0.36097	0.12104	0.19275	0.32	0.36	0.15	0.17	0.34	0.03	0.0882	0.16	0.01	0.0625	0.472	0.000609131	0.0109644	down
2588	XP_039474216.1	la-related protein 1 isoform X4 [Oreochromis aureus]	1361	89	0.682382	3.39503	0.000349529	50.055	31.785	50.055	S	AT(0.001)EES(0.004)KGDCDS(0.312)EDKQS(0.682)EEGVK	AT(-28)EES(-22)KGDCDS(-3.4)EDKQS(3.4)EEGVK	16	5	4.3289	933	1991	1991	F2	28169	0.17782	0.20608	0.23372	0.38238	0.18	0.2	0.29	0.33	0.19	0.01	0.0526	0.31	0.03	0.0968	1.636	0.0020297	0.0205747	up
2605	XP_039474216.1	la-related protein 1 isoform X4 [Oreochromis aureus]	1361	485	0.999943	42.4669	0.000894935	78.964	56.386	74.475	S	QMTEEPRGS(1)PR	QMT(-42)EEPRGS(42)PR	9	3	-0.47034	6863	13744;13745;13746	13744	F1	13496	0.16765	0.1886	0.25966	0.37602	0.17	0.19	0.33	0.32	0.18	0.01	0.0556	0.325	0.01	0.0308	1.811	0.000387382	0.00940266	up
2689	XP_031594304.1	par-3 family cell polarity regulator beta a [Oreochromis aureus]	1391	828	0.508519	0.405709	0.00332171	44.788	25.502	44.788	S	S(0.457)S(0.491)S(0.497)LES(0.509)LQT(0.046)AMS(0.001)EAK	S(-0.41)S(-0.41)S(0.41)LES(0.41)LQT(-7.7)AMS(-28)EAK	6	3	0.63578	9399	19318	19318	F3	49563	0.32471	0.39022	0.12084	0.16423	0.32	0.39	0.15	0.14	0.355	0.05	0.1408	0.145	0.01	0.0690	0.413	0.000683082	0.0120588	down
2690	XP_031594321.1	mitogen-activated protein kinase kinase kinase kinase 4-like isoform X3 [Oreochromis aureus]	1394	626	0.952505	13.0222	1.15777e-06	97.271	72.217	97.271	S	LEHQAS(0.953)S(0.047)EEVPPKVPVR	LEHQAS(13)S(-13)EEVPPKVPVR	6	4	0.088083	5247	10598;10599	10599	F3	36792	0.19821	0.18977	0.23212	0.3799	0.2	0.19	0.29	0.33	0.195	0.01	0.0513	0.31	0.03	0.0968	1.591	0.00141255	0.0168973	up
2744	XP_031594856.1	RRP12-like protein [Oreochromis aureus]	1424	1055	0.999985	48.2773	2.46411e-08	99.021	83.482	80.98	S	QATEEQDDS(1)ES(1)EQEAPK	QAT(-48)EEQDDS(48)ES(55)EQEAPK	9	3	-0.89586	6620	13241;13242;13243	13242	F1	22959	0.3015	0.3462	0.15404	0.18366	0.3	0.34	0.19	0.16	0.32	0.03	0.0938	0.175	0.02	0.1143	0.549	0.0021902	0.0218283	down
2745	XP_031594856.1	RRP12-like protein [Oreochromis aureus]	1424	1057	0.999997	55.023	2.46411e-08	99.021	83.482	80.98	S	QATEEQDDS(1)ES(1)EQEAPK	QAT(-48)EEQDDS(48)ES(55)EQEAPK	11	3	-0.89586	6620	13241;13242;13243	13242	F1	22959	0.3015	0.3462	0.15404	0.18366	0.3	0.34	0.19	0.16	0.32	0.03	0.0938	0.175	0.02	0.1143	0.549	0.0021902	0.0218283	down
2772	XP_031595096.1	uncharacterized protein LOC116319802 isoform X8 [Oreochromis aureus]	1445	1004	0.611479	3.63245	2.50538e-47	129.18	115.13	129.18	S	GT(0.124)RPVS(0.611)APVFS(0.265)QAALMEAGIPMAPLDQPQTSTPIK	GT(-6.9)RPVS(3.6)APVFS(-3.6)QAALMEAGIPMAPLDQPQT(-110)S(-120)T(-120)PIK	6	4	0.95262	3574	7148	7148	F1	47987	0.30159	0.34557	0.15473	0.19811	0.3	0.34	0.19	0.17	0.32	0.03	0.0938	0.18	0.01	0.0556	0.565	0.00127034	0.0165596	down
2784	XP_031595173.1	mediator of RNA polymerase II transcription subunit 24 isoform X3 [Oreochromis aureus]	1450	859	0.588892	1.57203	1.06833e-05	74.63	69.201	74.63	S	LLS(0.411)S(0.589)NEDEPVALS(0.142)S(0.858)PGDR	LLS(-1.6)S(1.6)NEDEPVALS(-7.9)S(7.9)PGDR	4	3	0.9274	5540	11132	11132	F2	47914	0.28549	0.36157	0.15614	0.1968	0.28	0.36	0.2	0.17	0.32	0.06	0.1875	0.185	0.02	0.1081	0.587	0.00810677	0.0407253	down
2785	XP_031595173.1	mediator of RNA polymerase II transcription subunit 24 isoform X3 [Oreochromis aureus]	1450	869	0.858408	7.85923	6.92567e-07	83.047	65.303	74.63	S	LLS(0.411)S(0.589)NEDEPVALS(0.142)S(0.858)PGDR	LLS(-1.6)S(1.6)NEDEPVALS(-7.9)S(7.9)PGDR	14	3	0.9274	5540	11132;11133	11132	F2	47914	0.28549	0.36157	0.15614	0.1968	0.28	0.36	0.2	0.17	0.32	0.06	0.1875	0.185	0.02	0.1081	0.587	0.00810677	0.0407253	down
2822	XP_031595400.1	origin recognition complex subunit 4 isoform X2 [Oreochromis aureus]	1469	104	0.907118	13.4883	0.00243588	51.487	22.942	51.487	S	S(0.037)QAS(0.907)DEDRT(0.041)EHS(0.015)PK	S(-14)QAS(13)DEDRT(-13)EHS(-18)PK	4	3	0.40993	9052	18536	18536	F2	16851	0.3088	0.34869	0.15144	0.19107	0.31	0.34	0.19	0.16	0.325	0.02	0.0615	0.175	0.02	0.1143	0.54	0.00158597	0.0175551	down
2845	XP_039472072.1	monocarboxylate transporter 7 [Oreochromis aureus]	1480	555	0.999799	37.8503	1.30013e-10	121.25	112.08	121.25	S	SESNAAHKEES(1)EEQTEEN	S(-46)ES(-38)NAAHKEES(38)EEQT(-49)EEN	11	3	-0.98779	8270	16897	16897	F2	22118	0.16527	0.1949	0.27262	0.36721	0.16	0.19	0.34	0.32	0.175	0.02	0.1143	0.33	0.01	0.0303	1.899	0.00121292	0.0159874	up
2975	XP_031596155.2	LOW QUALITY PROTEIN: NADP-dependent malic enzyme [Oreochromis aureus]	1546	10	0.999968	44.9997	3.28051e-06	107.14	87.4	107.14	S	RES(1)VETEMHR	RES(45)VET(-45)EMHR	3	3	0.97095	7220	14596;14597;14598;14599;14600;14601;14602;14603;14604;14605;14606;14607;14608;14609;14610;14611	14608	F3	20655	0.18642	0.19714	0.2614	0.32627	0.18	0.19	0.33	0.28	0.185	0.01	0.0541	0.305	0.04	0.1311	1.65	0.00214562	0.0215794	up
3012	XP_031596535.1	smad nuclear-interacting protein 1 [Oreochromis aureus]	1570	43	1	51.4453	0.017701	51.445	33.626	51.445	S	LS(1)PARPQR	LS(51)PARPQR	2	3	-0.96295	5759	11528	11528	F3	19727	0.22963	0.17883	0.24751	0.34404	0.23	0.18	0.31	0.3	0.205	0.04	0.1951	0.305	0.01	0.0328	1.51	0.0108911	0.047895	up
3029	XP_039475256.1	MAP7 domain-containing protein 1a isoform X6 [Oreochromis aureus]	1577	80	0.996926	22.6354	1.01455e-11	104.24	71.156	68.42	S	S(0.011)DIIS(0.464)RS(0.527)PAS(0.997)PAS(1)PALK	S(-17)DIIS(-0.56)RS(0.56)PAS(23)PAS(41)PALK	10	4	0.56033	8109;8918	16568;18294	16568	F3	42217	0.17683	0.17489	0.24744	0.40084	0.18	0.17	0.31	0.35	0.175	0.01	0.0571	0.33	0.03	0.0909	1.887	0.000498811	0.00977137	up
3030	XP_039475256.1	MAP7 domain-containing protein 1a isoform X6 [Oreochromis aureus]	1577	83	0.999945	40.8099	0.000944458	68.42	40.516	68.42	S	S(0.011)DIIS(0.464)RS(0.527)PAS(0.997)PAS(1)PALK	S(-17)DIIS(-0.56)RS(0.56)PAS(23)PAS(41)PALK	13	4	0.56033	8109;8918	16568	16568	F3	42217	0.17683	0.17489	0.24744	0.40084	0.18	0.17	0.31	0.35	0.175	0.01	0.0571	0.33	0.03	0.0909	1.887	0.000498811	0.00977137	up
3031	XP_039475256.1	MAP7 domain-containing protein 1a isoform X6 [Oreochromis aureus]	1577	402	0.978387	16.9939	1.54934e-38	152.04	133.27	152.04	S	T(0.002)AS(0.978)PS(0.02)PAASPKPPSTR	T(-27)AS(17)PS(-17)PAAS(-88)PKPPS(-130)T(-130)R	3	3	0.89038	9806	20176;20177;20178;20179;20180	20177	F4	22722	0.20225	0.1659	0.2576	0.37425	0.2	0.16	0.32	0.32	0.18	0.03	0.1667	0.32	0	0	1.8	0.00286995	0.0230964	up
3032	XP_039475256.1	MAP7 domain-containing protein 1a isoform X6 [Oreochromis aureus]	1577	404	0.994748	21.3239	0.00738033	54.672	39.75	54.672	S	T(0.534)AS(0.47)PS(0.995)PAAS(0.001)PKPPSTR	T(0.55)AS(-0.55)PS(21)PAAS(-28)PKPPS(-45)T(-45)R	5	3	1.8045	9806	20175	20175	F3	25248	0.21029	0.17032	0.24828	0.37111	0.21	0.17	0.31	0.32	0.19	0.03	0.1579	0.315	0.01	0.0317	1.676	0.00368568	0.0263155	up
3033	XP_039475256.1	MAP7 domain-containing protein 1a isoform X6 [Oreochromis aureus]	1577	408	0.943233	14.9227	0.00832761	52.483	40.403	52.483	S	T(0.717)AS(0.132)PS(0.153)PAAS(0.943)PKPPS(0.026)T(0.028)R	T(6.6)AS(-7.5)PS(-6.6)PAAS(15)PKPPS(-15)T(-15)R	9	3	1.4138	9806	20174	20174	F3	24028	0.19232	0.18878	0.23086	0.38805	0.19	0.19	0.29	0.33	0.19	0	0	0.31	0.03	0.0968	1.631	0.000974839	0.0151414	up
3058	XP_031596751.2	scavenger receptor class F member 1 [Oreochromis aureus]	1596	653	1	41.202	0.0112013	41.202	25.936	41.202	S	RGS(1)AQDPGALLR	RGS(41)AQDPGALLR	3	3	-1.7121	7265	14718	14718	F4	31649	0.20153	0.20578	0.22611	0.36658	0.2	0.2	0.28	0.32	0.2	0	0	0.3	0.03	0.1000	1.5	0.00186555	0.0194219	up
3060	XP_039461804.1	CTP synthase 1 [Oreochromis aureus]	1597	572	0.828531	9.81825	2.2525e-24	97.916	83.863	52.722	S	DT(0.018)Y(0.013)S(0.059)DRS(0.829)GS(0.204)S(0.455)T(0.419)PDS(0.001)EIS(0.001)ELKLPSLSNE	DT(-17)Y(-20)S(-12)DRS(9.8)GS(-5)S(0.37)T(-0.37)PDS(-27)EIS(-31)ELKLPS(-40)LS(-40)NE	7	3	-0.12024	1630;1631;8446;8447	3284;3285	3285	F4	50338	0.31702	0.33888	0.1553	0.20616	0.31	0.34	0.2	0.18	0.325	0.02	0.0615	0.19	0.01	0.0526	0.586	0.000928351	0.0146258	down
3062	XP_039461804.1	CTP synthase 1 [Oreochromis aureus]	1597	575	0.827773	8.34645	1.72347e-05	89.358	51.808	77.191	S	S(0.048)GS(0.168)S(0.828)T(0.915)PDS(0.042)EISELK	S(-15)GS(-8.3)S(8.3)T(13)PDS(-16)EIS(-59)ELK	4	3	0.36276	1630;1631;8446;8447	17249;17250;17251;17254	17251	F2	42918	0.64875	0.67242	0.25572	0.41551	0.64	0.66	0.32	0.36	0.65	0.01	0.0154	0.34	0.03	0.0882	0.523	0.000336259	0.00905784	down
3066	XP_031596779.1	echinoderm microtubule-associated protein-like 3 isoform X1 [Oreochromis aureus]	1599	241	0.818591	11.6602	0.000357662	50.87	39.867	50.87	S	EDLLDGS(0.056)CS(0.819)PEEPGS(0.046)AS(0.034)AS(0.045)FK	EDLLDGS(-12)CS(12)PEEPGS(-12)AS(-14)AS(-13)FK	9	4	1.2718	1834	3649	3649	F3	48305	0.17878	0.20774	0.23728	0.37619	0.18	0.21	0.3	0.32	0.195	0.02	0.1026	0.31	0.01	0.0323	1.6	0.00234857	0.022507	up
3077	XP_031596779.1	echinoderm microtubule-associated protein-like 3 isoform X1 [Oreochromis aureus]	1599	254	0.615136	2.03664	0.0036669	72.478	44.762	72.478	S	S(0.615)S(0.385)DQNLSSR	S(2)S(-2)DQNLS(-66)S(-70)R	1	2	1.5863	9217	18891	18891	F1	15055	0.14528	0.17338	0.28596	0.39539	0.14	0.17	0.36	0.34	0.155	0.02	0.129	0.35	0.01	0.0286	2.28	0.000785501	0.0129703	up
3079	XP_031596826.1	solute carrier family 22 member 18 [Oreochromis aureus]	1601	221	0.999936	41.9524	0.000403918	70.235	50.964	70.235	S	KKS(1)VFNLGEITR	KKS(42)VFNLGEIT(-42)R	3	4	0.35647	4748	9592;9593	9593	F6	38932	0.35202	0.27677	0.15575	0.21546	0.35	0.27	0.2	0.19	0.31	0.06	0.1935	0.195	0.01	0.0513	0.64	0.00948245	0.0452339	down
3148	XP_039470275.1	dematin isoform X3 [Oreochromis aureus]	1634	315	0.989297	19.6581	3.51715e-15	132.08	86.291	132.08	S	GNS(0.989)LPS(0.011)ILEQK	GNS(20)LPS(-20)ILEQK	3	3	-0.8169	3314	6568	6568	F4	46673	0.34604	0.2813	0.16455	0.20811	0.34	0.28	0.21	0.18	0.31	0.04	0.129	0.195	0.02	0.1026	0.635	0.00759248	0.0389652	down
3154	XP_039476336.1	rab11 family-interacting protein 5 isoform X2 [Oreochromis aureus]	1635	159	1	59.2475	0.000618495	59.248	34.223	59.248	S	NNMT(1)AS(1)MFDLT(1)MK	NNMT(59)AS(59)MFDLT(59)MK	6	2	0.55114	6370	12751;12752	12751	F2	47854	0.27616	0.58575	0.05163	0.086457	0.27	0.58	0.06	0.07	0.425	0.22	0.5176	0.065	0.01	0.1538	0.176	0.00402738	0.0281041	down
3166	XP_031597507.1	heat shock factor protein 2 [Oreochromis aureus]	1648	304	1	72.5608	1.8809e-63	164.53	137.1	164.53	S	HTEAVS(1)PAPADDSQR	HT(-73)EAVS(73)PAPADDS(-74)QR	6	2	-0.84008	4012	8063;8064;8065;8066	8063	F1	17345	0.31614	0.30477	0.15168	0.24256	0.31	0.3	0.19	0.21	0.305	0.01	0.0328	0.2	0.01	0.0500	0.656	0.000798952	0.0129703	down
3169	XP_031597561.1	keratinocyte differentiation factor 1 [Oreochromis aureus]	1651	133	0.998777	29.1221	1.6503e-07	98.21	74.169	98.21	S	ESSPDEPERLS(0.999)LQAMNS(0.001)R	ES(-67)S(-62)PDEPERLS(29)LQAMNS(-29)R	11	3	-1.5215	2311	4578	4578	F3	38997	0.17039	0.18692	0.32129	0.3214	0.17	0.18	0.4	0.28	0.175	0.01	0.0571	0.34	0.08	0.2353	1.944	0.00835865	0.0417774	up
3183	XP_039461167.1	phosphatase and actin regulator 4A isoform X1 [Oreochromis aureus]	1655	161	0.997807	26.5801	0.00570762	63.76	33.429	63.76	S	NRVPS(0.998)DAS(0.002)R	NRVPS(27)DAS(-27)R	5	3	-0.72262	6441	12875	12875	F2	14830	0.33571	0.36271	0.12488	0.1767	0.33	0.36	0.16	0.15	0.345	0.02	0.058	0.155	0.01	0.0645	0.45	0.000130864	0.00545972	down
3213	XP_031597896.2	lysine-specific demethylase 9 [Oreochromis aureus]	1682	37	1	52.4633	0.00539164	52.463	28.709	52.463	S	DLS(1)PLADKR	DLS(52)PLADKR	3	3	0.1794	1430	2890	2890	F3	37181	0.18407	0.20719	0.24797	0.36078	0.18	0.2	0.31	0.31	0.19	0.01	0.0526	0.31	0	0	1.636	0.000515703	0.00978565	up
3245	XP_031598114.1	BCL2 interacting protein 4 [Oreochromis aureus]	1699	91	0.745906	5.74179	1.11985e-05	78.95	68.045	78.95	S	GSEGNS(0.199)S(0.746)QS(0.055)DEDFQER	GS(-48)EGNS(-5.7)S(5.7)QS(-11)DEDFQER	7	2	2.5345	3434	6818	6818	F1	23068	0.16706	0.17744	0.26242	0.39308	0.17	0.18	0.33	0.34	0.175	0.01	0.0571	0.335	0.01	0.0299	1.916	5.1965e-05	0.00312764	up
3247	XP_031598114.1	BCL2 interacting protein 4 [Oreochromis aureus]	1699	140	0.928896	11.9907	0.0231857	73.573	11.991	73.573	S	S(0.012)T(0.059)S(0.929)LSIR	S(-19)T(-12)S(12)LS(-35)IR	3	2	0.41516	9564	19624	19624	F3	32078	0.1601	0.17242	0.31161	0.35587	0.16	0.17	0.39	0.31	0.165	0.01	0.0606	0.35	0.06	0.1714	2.123	0.00165687	0.018029	up
3261	XP_031598186.2	uncharacterized protein KIAA1522-like [Oreochromis aureus]	1702	755	0.74496	4.65533	2.93267e-05	56.768	40.877	56.768	S	QS(0.745)PS(0.255)AAAEESAK	QS(4.7)PS(-4.7)AAAEES(-52)AK	2	3	1.1956	6985	14075;14076	14076	F2	26223	0.18698	0.19327	0.21356	0.4062	0.19	0.19	0.27	0.35	0.19	0	0	0.31	0.06	0.1935	1.631	0.00765244	0.0389652	up
3278	XP_031598220.2	pleckstrin homology domain-containing family G member 3 isoform X3 [Oreochromis aureus]	1707	548	1	88.5614	5.85236e-06	111.35	87.001	88.561	S	HADS(1)EGALLGAR	HADS(89)EGALLGAR	4	3	-0.66454	3695	7366;7367	7367	F3	32430	0.19438	0.20179	0.25369	0.35014	0.19	0.2	0.32	0.3	0.195	0.01	0.0513	0.31	0.01	0.0323	1.591	0.000294998	0.00820458	up
3291	XP_031598301.1	metadherin a isoform X2 [Oreochromis aureus]	1711	248	0.997588	26.1991	0.00256418	50.155	38.681	50.155	S	NRGS(0.998)HES(0.002)FHSR	NRGS(26)HES(-26)FHS(-47)R	4	4	1.437	3448;6433	12860	12860	F3	8515	0.33878	0.5225	0.058193	0.080522	0.34	0.52	0.07	0.07	0.43	0.13	0.3023	0.07	0	0	0.17	0.00068555	0.0120588	down
3301	XP_039471878.1	serine/arginine-rich splicing factor 9 [Oreochromis aureus]	1714	219	0.666618	3.00934	0.0358555	50.675	38.76	50.675	S	HAMS(0.667)RHS(0.333)PPPR	HAMS(3)RHS(-3)PPPR	4	3	-0.3698	3702	7377	7377	F3	5848	0.27971	0.35527	0.1489	0.22015	0.28	0.35	0.19	0.19	0.315	0.05	0.1587	0.19	0	0	0.611	0.00449706	0.0304174	down
3314	XP_031598354.1	splicing factor ESS-2 homolog [Oreochromis aureus]	1720	391	1	106.14	0.000140909	106.14	84.633	106.14	S	GLS(1)PALS(1)PALQK	GLS(110)PALS(110)PALQK	3	3	-0.46213	3259	6432	6432	F3	45686	0.3166	0.31581	0.16213	0.20546	0.31	0.31	0.2	0.18	0.31	0	0	0.19	0.01	0.0526	0.613	0.000505201	0.00977137	down
3315	XP_031598354.1	splicing factor ESS-2 homolog [Oreochromis aureus]	1720	395	1	106.14	0.000140909	106.14	84.633	106.14	S	GLS(1)PALS(1)PALQK	GLS(110)PALS(110)PALQK	7	3	-0.46213	3259	6432	6432	F3	45686	0.3166	0.31581	0.16213	0.20546	0.31	0.31	0.2	0.18	0.31	0	0	0.19	0.01	0.0526	0.613	0.000505201	0.00977137	down
3337	XP_031598493.1	tyrosine-protein kinase ABL1 isoform X1 [Oreochromis aureus]	1731	570	0.823049	6.67741	1.10077e-09	84.318	66.18	84.318	S	DTESPDLLETEGAVS(0.177)S(0.823)PMLPR	DT(-77)ES(-73)PDLLET(-41)EGAVS(-6.7)S(6.7)PMLPR	16	3	2.0756	1596	3221	3221	F3	50795	0.30976	0.33509	0.14812	0.20703	0.31	0.33	0.19	0.18	0.32	0.01	0.0312	0.185	0.01	0.0541	0.579	0.000185763	0.00684975	down
3338	XP_031598493.1	tyrosine-protein kinase ABL1 isoform X1 [Oreochromis aureus]	1731	16	1	77.5932	0.000627005	77.593	65.367	77.593	S	RPS(1)LPAFIK	RPS(78)LPAFIK	3	3	1.3598	7605	15481	15481	F6	40656	0.16639	0.21503	0.26621	0.35237	0.16	0.21	0.33	0.3	0.185	0.04	0.2162	0.315	0.02	0.0635	1.734	0.00739266	0.0386647	up
3343	XP_031598516.1	interferon regulatory factor 2-binding protein 1-like [Oreochromis aureus]	1735	124	0.971452	15.5592	5.31657e-06	100.53	85.444	100.53	S	AEDVALSEGS(0.027)RQS(0.971)PNT(0.001)R	AEDVALS(-39)EGS(-16)RQS(16)PNT(-28)R	13	3	-0.56631	230;231	477	477	F2	31992	0.18086	0.14279	0.28115	0.3952	0.18	0.14	0.35	0.34	0.16	0.03	0.1875	0.345	0.01	0.0290	2.191	0.0017832	0.0189864	up
3350	XP_039475500.1	protein cordon-bleu isoform X6 [Oreochromis aureus]	1739	229	1	96.8236	1.46203e-06	105.39	83.832	105.39	S	MAS(1)APALNYTDFVR	MAS(97)APALNY(-97)T(-99)DFVR	3	3	-0.78957	5948	11900;11901;11902	11900	F5	45216	0.20624	0.20106	0.24149	0.37678	0.2	0.2	0.3	0.32	0.2	0	0	0.31	0.01	0.0323	1.55	0.000168981	0.00654185	up
3356	XP_039475500.1	protein cordon-bleu isoform X6 [Oreochromis aureus]	1739	974	0.999484	32.8706	2.19884e-06	99.407	88.145	99.407	S	SSESQINS(0.001)DEGS(0.999)PLLGK	S(-69)S(-74)ES(-69)QINS(-33)DEGS(33)PLLGK	12	3	3.0041	9232	18923;18924	18924	F3	39571	0.18613	0.22069	0.25889	0.33429	0.18	0.22	0.33	0.29	0.2	0.03	0.15	0.31	0.03	0.0968	1.566	0.00771619	0.0391862	up
3398	XP_031598703.1	calcium/calmodulin-dependent protein kinase type II delta chain isoform X7 [Oreochromis aureus]	1757	402	0.710309	6.05106	1.59527e-30	99.228	89.109	99.228	S	IAWNS(0.71)T(0.176)GNS(0.069)S(0.038)CPES(0.002)ELS(0.002)QS(0.002)S(0.002)IPAAPLGSNTVAAK	IAWNS(6.1)T(-6.1)GNS(-10)S(-13)CPES(-27)ELS(-27)QS(-27)S(-27)IPAAPLGS(-68)NT(-73)VAAK	5	4	-1.1702	4089	8201;8203	8201	F6	45663	0.74155	0.56582	0.30419	0.38844	0.73	0.56	0.38	0.33	0.645	0.12	0.186	0.355	0.04	0.1127	0.56	0.00648189	0.0360552	down
3406	XP_031598725.1	eukaryotic elongation factor 2 kinase isoform X4 [Oreochromis aureus]	1758	72	0.709425	3.87648	0.0102516	72.434	42.667	72.434	S	QLS(0.709)NS(0.291)LPK	QLS(3.9)NS(-3.9)LPK	3	2	4.2391	6845	13709	13709	F4	33800	0.1624	0.17811	0.22035	0.43915	0.16	0.18	0.28	0.38	0.17	0.01	0.0588	0.33	0.07	0.2121	1.948	0.00618546	0.0352878	up
3414	XP_031598763.1	PHD finger protein 3 isoform X3 [Oreochromis aureus]	1761	1590	0.998113	30.2259	0.00294497	60.167	49.415	60.161	S	HHS(0.998)DDYS(0.001)S(0.001)R	HHS(30)DDY(-37)S(-31)S(-30)R	3	3	-0.39106	3814	7601;7602;7603	7602	F2	8779	0.36181	0.32596	0.1127	0.19167	0.36	0.32	0.14	0.17	0.34	0.03	0.0882	0.155	0.02	0.1290	0.458	0.00122443	0.0160153	down
3420	XP_039477164.1	LIM and calponin homology domains-containing protein 1 isoform X7 [Oreochromis aureus]	1768	519	1	84.8736	4.33781e-06	84.874	58.276	84.874	S	ALS(1)PKPVPLLMPK	ALS(85)PKPVPLLMPK	3	4	-0.52454	604	1327;1328	1328	F6	44011	0.33123	0.29331	0.14686	0.2286	0.33	0.29	0.18	0.2	0.31	0.03	0.0968	0.19	0.01	0.0526	0.615	0.00206884	0.0209164	down
3467	XP_031599038.1	interferon-induced helicase C domain-containing protein 1 isoform X1 [Oreochromis aureus]	1779	276	0.995271	23.536	1.61398e-07	107.57	96.292	107.57	S	ATTGES(0.995)PAS(0.004)AESCDGTESR	AT(-55)T(-40)GES(24)PAS(-24)AES(-37)CDGT(-57)ES(-62)R	6	2	-0.3709	972	2076	2076	F1	20845	0.19148	0.18486	0.27064	0.35302	0.19	0.18	0.34	0.3	0.185	0.01	0.0541	0.32	0.03	0.0938	1.731	0.000807354	0.0129703	up
3476	XP_031599153.1	insulin-like growth factor 2 mRNA-binding protein 2a isoform X2 [Oreochromis aureus]	1784	191	0.569925	1.22314	6.5087e-09	91.416	72.341	91.416	S	DQGSSQPGPS(0.43)GGYGS(0.57)PRPR	DQGS(-61)S(-61)QPGPS(-1.2)GGY(-42)GS(1.2)PRPR	15	3	-0.58492	1499;9366	3026	3026	F3	21854	0.18115	0.17907	0.2473	0.39248	0.18	0.18	0.31	0.34	0.18	0	0	0.325	0.02	0.0615	1.806	0.00020363	0.00684975	up
3547	XP_039462472.1	microtubule-associated protein 1B [Oreochromis aureus]	1807	516	0.993388	21.7677	0.000815517	74.46	29.383	74.46	S	RADS(0.993)RES(0.007)LK	RADS(22)RES(-22)LK	4	4	2.0945	7099	14348;14349	14348	F2	20794	0.18068	0.16997	0.26562	0.3734	0.18	0.17	0.33	0.32	0.175	0.01	0.0571	0.325	0.01	0.0308	1.858	6.05022e-05	0.00345266	up
3549	XP_031599410.1	ribosomal protein S6 kinase alpha-4 [Oreochromis aureus]	1808	728	1	87.1601	4.88888e-08	87.16	63.361	87.16	S	EGFFLKS(1)VDNAPLAK	EGFFLKS(87)VDNAPLAK	7	4	0.067633	1933	3863	3863	F5	44205	0.29857	0.31146	0.15648	0.23348	0.3	0.31	0.2	0.2	0.305	0.01	0.0328	0.2	0	0	0.656	2.66264e-05	0.00181531	down
3551	XP_031599485.1	serine/threonine-protein kinase ULK1a isoform X3 [Oreochromis aureus]	1812	625	0.817143	6.55204	0.00579163	42.679	24.314	42.679	S	RFS(0.817)DT(0.181)PS(0.002)YLNSGWR	RFS(6.6)DT(-6.6)PS(-27)Y(-35)LNS(-38)GWR	3	3	-0.95575	7234	14639	14639	F6	41129	0.33372	0.34206	0.11257	0.21166	0.33	0.34	0.14	0.18	0.335	0.01	0.0299	0.16	0.03	0.1875	0.478	0.00197318	0.0201878	down
3552	XP_031599476.1	transmembrane protein 87A [Oreochromis aureus]	1814	512	0.99994	41.9337	5.90044e-25	113.37	100.41	113.37	S	YAFSPLVDEES(1)DEEEKEPMMNDAFEGVK	Y(-73)AFS(-42)PLVDEES(42)DEEEKEPMMNDAFEGVK	11	4	-0.38852	11337	23303;23304;23305;23306;23307	23305	F4	50029	0.22475	0.19497	0.25822	0.34508	0.22	0.19	0.32	0.3	0.205	0.02	0.0976	0.31	0.01	0.0323	1.52	0.00288481	0.0230964	up
3555	XP_031599501.1	hepatocyte nuclear factor 1-alpha [Oreochromis aureus]	1817	291	0.998511	33.0908	6.42984e-25	106.37	87.928	97.243	S	LALDTPFTSQTASSSNANLPPS(0.999)PEHGVK	LALDT(-67)PFT(-56)S(-50)QT(-52)AS(-33)S(-33)S(-33)NANLPPS(33)PEHGVK	22	4	0.23509	5141	10411;10412;10413	10413	F6	44141	0.3213	0.26859	0.15715	0.22011	0.32	0.27	0.2	0.19	0.295	0.04	0.1356	0.195	0.01	0.0513	0.666	0.00406731	0.028357	down
3584	XP_031599609.2	YEATS domain-containing protein 2 [Oreochromis aureus]	1830	1116	0.999441	33.6048	4.44574e-52	139.69	125.23	139.69	S	TEPGAGTAVTAGPS(0.999)PPVTTAPASSVHVASAATTVK	T(-84)EPGAGT(-72)AVT(-47)AGPS(34)PPVT(-34)T(-40)APAS(-53)S(-53)VHVAS(-63)AAT(-74)T(-79)VK	14	4	-0.43792	9900	20383;20384	20383	F5	36787	0.30043	0.30187	0.14136	0.25634	0.3	0.3	0.18	0.22	0.3	0	0	0.2	0.03	0.1500	0.666	0.00573198	0.0335301	down
3585	XP_031599617.2	transcription termination factor 4, mitochondrial [Oreochromis aureus]	1831	311	0.966066	14.5437	1.11685e-07	65.248	55.748	65.248	S	T(0.034)EPDS(0.966)DDEDDDEDVDDDDDREAK	T(-15)EPDS(15)DDEDDDEDVDDDDDREAK	5	4	0.30023	9899	20382	20382	F2	28661	0.14871	0.19365	0.27611	0.38153	0.15	0.19	0.35	0.33	0.17	0.03	0.1765	0.34	0.01	0.0294	2.028	0.00215716	0.0216296	up
3625	XP_031599838.1	importin subunit alpha-3 [Oreochromis aureus]	1848	60	1	44.5409	1.35768e-205	219.64	195.34	44.541	S	NVPHEDICEDS(1)DVDGDFR	NVPHEDICEDS(45)DVDGDFR	11	3	-0.64434	6520	13045;13046;13047;13048;13049;13050	13050	F5	34121	0.19937	0.19287	0.23224	0.38827	0.2	0.19	0.29	0.33	0.195	0.01	0.0513	0.31	0.03	0.0968	1.591	0.00141255	0.0168973	up
3661	XP_031599994.1	104 kDa microneme/rhoptry antigen [Oreochromis aureus]	1866	583	0.888521	9.01479	1.29628e-21	138.04	107.27	138.04	S	S(0.111)AS(0.889)IGDLLSESDACTQMK	S(-9)AS(9)IGDLLS(-59)ES(-91)DACT(-120)QMK	3	3	2.4844	8001	16316	16316	F4	48939	0.21351	0.19575	0.22081	0.36993	0.21	0.19	0.28	0.32	0.2	0.01	0.05	0.3	0.03	0.1000	1.504	0.00354841	0.0256685	up
3665	XP_031599999.1	zinc finger protein 414 isoform X3 [Oreochromis aureus]	1868	251	0.983271	19.5289	1.83087e-18	95.823	79.709	95.823	S	SPETIHPAPGS(0.011)APHS(0.983)PPGS(0.003)S(0.003)AIWK	S(-76)PET(-76)IHPAPGS(-20)APHS(20)PPGS(-26)S(-25)AIWK	15	4	0.56574	8934	18329	18329	F5	35232	0.20008	0.20433	0.2374	0.3582	0.2	0.2	0.3	0.31	0.2	0	0	0.305	0.01	0.0328	1.525	2.48754e-05	0.00172649	up
3694	XP_031600118.1	COP9 signalosome complex subunit 7a [Oreochromis aureus]	1885	267	0.991157	20.4953	0.0371756	52.716	31.209	52.716	S	IWS(0.009)KS(0.991)N	IWS(-20)KS(20)N	5	3	-1.6418	4493	9045	9045	F5	34170	0.32706	0.28177	0.1463	0.24487	0.32	0.28	0.18	0.21	0.3	0.03	0.1	0.195	0.02	0.1026	0.653	0.00528139	0.0322031	down
3737	XP_031600369.1	sorting nexin-1 [Oreochromis aureus]	1911	190	1	65.628	1.28462e-05	108.18	63.419	108.18	S	RFS(1)DFLGLYEK	RFS(66)DFLGLY(-66)EK	3	3	0.14838	7230;7663	14630;15603	14630	F6	47452	0.30271	0.31204	0.15175	0.2335	0.3	0.31	0.19	0.2	0.305	0.01	0.0328	0.195	0.01	0.0513	0.639	0.00013465	0.00545972	down
3737	XP_031608666.1	sorting nexin-1a isoform X2 [Oreochromis aureus]	2673	414	1	65.628	1.28462e-05	108.18	63.419	108.18	S	RFS(1)DFLGLYEK	RFS(66)DFLGLY(-66)EK	3	3	0.14838	7230;7663	14630;15603	14630	F6	47452	0.30271	0.31204	0.15175	0.2335	0.3	0.31	0.19	0.2	0.305	0.01	0.0328	0.195	0.01	0.0513	0.639	0.00013465	0.00545972	down
3746	XP_031600497.1	protein phosphatase Slingshot homolog 3 [Oreochromis aureus]	1918	31	1	43.6283	0.000110828	116.13	60.782	43.628	S	RES(1)FALVK	RES(44)FALVK	3	3	1.3194	7211	14574;14575;14576;14577	14577	F6	33789	0.17418	0.18227	0.29367	0.35127	0.17	0.18	0.37	0.3	0.175	0.01	0.0571	0.335	0.05	0.1493	1.916	0.00196287	0.0201358	up
3774	XP_031600698.1	cytoplasmic dynein 1 light intermediate chain 2 isoform X2 [Oreochromis aureus]	1933	375	0.9389	11.8658	0.0353266	51.488	15.107	51.488	S	GAT(0.061)ES(0.939)PGR	GAT(-12)ES(12)PGR	5	2	1.7239	2835	5527	5527	F1	11192	0.16687	0.1568	0.27358	0.40275	0.17	0.16	0.34	0.35	0.165	0.01	0.0606	0.345	0.01	0.0290	2.093	4.01819e-05	0.00253739	up
3777	XP_031600698.1	cytoplasmic dynein 1 light intermediate chain 2 isoform X2 [Oreochromis aureus]	1933	383	0.721289	5.30425	0.0164951	42.317	14.636	42.317	S	T(0.056)GS(0.213)AS(0.721)PRPAS(0.01)R	T(-11)GS(-5.3)AS(5.3)PRPAS(-18)R	5	3	1.797	9977	20546	20546	F2	11557	0.10942	0.13701	0.23835	0.51521	0.11	0.14	0.3	0.44	0.125	0.02	0.16	0.37	0.10	0.2703	3.003	0.00376553	0.0266143	up
3789	XP_039460408.1	E3 ubiquitin-protein ligase MIB2 isoform X3 [Oreochromis aureus]	1945	243	0.997375	25.798	1.24922e-20	138.28	117.89	106.51	S	LGEHAELQRQES(0.997)ADGHS(0.003)FQQGDK	LGEHAELQRQES(26)ADGHS(-26)FQQGDK	12	5	-2.1954	5323;6674	10721;13368	10721	F3	33393	0.32761	0.29277	0.15317	0.22646	0.32	0.29	0.19	0.19	0.305	0.02	0.0656	0.19	0	0	0.625	0.000465192	0.00940266	down
3800	XP_039460803.1	NAD kinase isoform X1 [Oreochromis aureus]	1951	40	0.824496	7.27065	1.1025e-08	123.1	83.18	123.1	S	S(0.155)LS(0.824)T(0.021)SSASTSFEYR	S(-7.3)LS(7.3)T(-16)S(-37)S(-56)AS(-60)T(-78)S(-88)FEY(-110)R	3	2	0.95815	8801	17960	17960	F4	38612	0.19183	0.18228	0.21815	0.40774	0.19	0.18	0.27	0.35	0.185	0.01	0.0541	0.31	0.06	0.1935	1.677	0.00694992	0.0372173	up
3826	XP_031601281.1	ATP-binding cassette sub-family A member 5 [Oreochromis aureus]	1975	845	0.751528	5.48637	0.000401081	56.72	45.098	56.72	S	EQADDECDT(0.036)AS(0.752)LDDT(0.212)DQR	EQADDECDT(-13)AS(5.5)LDDT(-5.5)DQR	11	3	-1.6908	2179	4332	4332	F1	25732	0.28523	0.44839	0.1133	0.15309	0.28	0.44	0.14	0.13	0.36	0.11	0.3056	0.135	0.01	0.0741	0.394	0.00547102	0.0323339	down
3851	XP_039470793.1	growth hormone receptor b isoform X3 [Oreochromis aureus]	1992	234	0.999973	45.6686	0.000612646	67.019	57.015	67.019	S	GIDSELLKS(1)GK	GIDS(-46)ELLKS(46)GK	9	4	0.37628	3121	6140	6140	F3	39709	0.33696	0.28596	0.14597	0.23111	0.33	0.28	0.18	0.2	0.305	0.04	0.1311	0.19	0.01	0.0526	0.627	0.00359522	0.025934	down
3852	XP_039470793.1	growth hormone receptor b isoform X3 [Oreochromis aureus]	1992	478	0.999961	44.1595	1.06665e-13	99.387	85.133	99.387	S	QNS(1)LLLSPNSAPAPHLIIPK	QNS(44)LLLS(-44)PNS(-68)APAPHLIIPK	3	4	-1.1106	6873	13774;13775	13774	F2	49203	0.30336	0.35939	0.12987	0.20739	0.3	0.36	0.16	0.18	0.33	0.04	0.1212	0.17	0.01	0.0588	0.519	0.00183196	0.0193152	down
3933	XP_031601990.2	melanoma inhibitory activity protein 2 isoform X1 [Oreochromis aureus]	2026	1820	1	107.327	4.77609e-17	107.33	67.148	107.33	S	LKGWDS(1)DLEEEEGGEK	LKGWDS(110)DLEEEEGGEK	6	4	2.5542	3663;5460;5461	7289;10990;10991;10992	10990	F3	47174	0.19366	0.19968	0.26111	0.34901	0.19	0.2	0.33	0.3	0.195	0.01	0.0513	0.315	0.02	0.0635	1.617	0.000604494	0.0109369	up
3960	XP_031602121.1	beta-chimaerin [Oreochromis aureus]	2038	190	0.958566	13.6427	0.0144053	78.377	32.995	78.377	S	IS(0.041)S(0.959)PLVR	IS(-14)S(14)PLVR	3	2	-2.9655	4421	8926	8926	F4	35553	0.17344	0.21354	0.23357	0.37946	0.17	0.21	0.29	0.33	0.19	0.03	0.1579	0.31	0.03	0.0968	1.65	0.00624937	0.0354269	up
3961	XP_039475521.1	neurobeachin-like protein 2 isoform X4 [Oreochromis aureus]	2040	1356	0.749	4.74809	4.96581e-07	93.73	85.626	72.433	S	T(0.251)S(0.749)QDIEDEDEEDEGGQR	T(-4.7)S(4.7)QDIEDEDEEDEGGQR	2	2	0.20025	10389	21416;21417	21416	F1	25249	0.29414	0.31154	0.16235	0.23196	0.29	0.31	0.2	0.2	0.3	0.01	0.0333	0.2	0	0	0.667	0.000243254	0.00720781	down
3978	XP_031602211.2	liprin-beta-1 [Oreochromis aureus]	2049	793	0.999818	37.3881	0.00173684	56.599	33.373	56.599	S	RLS(1)FGGFGTLR	RLS(37)FGGFGT(-37)LR	3	3	-0.64904	7452	15131	15131	F2	48576	0.19859	0.20417	0.24301	0.35424	0.2	0.2	0.31	0.3	0.2	0	0	0.305	0.01	0.0328	1.525	2.48754e-05	0.00172649	up
4031	XP_031602662.1	atlastin-2-like isoform X2 [Oreochromis aureus]	2092	598	0.990979	20.6892	0.0393727	40.801	19.931	40.801	S	AS(0.991)LT(0.008)EQGSQQTR	AS(21)LT(-21)EQGS(-34)QQT(-38)R	2	2	0.40936	833	1821	1821	F2	26509	0.2946	0.31886	0.14906	0.23749	0.29	0.32	0.19	0.2	0.305	0.02	0.0656	0.195	0.01	0.0513	0.641	0.000801489	0.0129703	down
4051	XP_031602706.1	glucose-6-phosphate 1-dehydrogenase-like isoform X2 [Oreochromis aureus]	2097	82	0.759692	4.99986	0.00176456	53.363	39.457	53.363	S	YDDGS(0.76)S(0.24)FDQLNK	Y(-41)DDGS(5)S(-5)FDQLNK	5	3	0.0096518	11354	23338	23338	F3	42097	0.296	0.32938	0.16774	0.21411	0.29	0.33	0.21	0.18	0.31	0.03	0.0968	0.195	0.02	0.1026	0.631	0.00409402	0.0284038	down
4061	XP_031602719.1	N-alpha-acetyltransferase 10 [Oreochromis aureus]	2101	190	0.999787	36.8583	4.12407e-49	147.12	124.54	97.203	S	ESERDS(1)GGESK	ES(-52)ERDS(37)GGES(-37)K	6	2	2.1317	2276;11125	4513;22903;22904;22905	4513	F1	14038	0.33664	0.2798	0.15982	0.22099	0.33	0.28	0.2	0.19	0.305	0.04	0.1311	0.195	0.01	0.0513	0.644	0.00294068	0.0233076	down
4066	XP_031602729.1	la-related protein 4 isoform X2 [Oreochromis aureus]	2103	714	0.754532	5.16215	1.15158e-05	73.688	54.134	73.688	S	AEEPGSS(0.016)S(0.23)S(0.755)PGDKHER	AEEPGS(-39)S(-17)S(-5.2)S(5.2)PGDKHER	9	4	0.74505	238;10999	493	493	F2	16986	0.16702	0.19424	0.27284	0.3659	0.17	0.19	0.34	0.31	0.18	0.01	0.0556	0.325	0.02	0.0615	1.811	0.000759159	0.012854	up
4101	XP_031602932.1	pre-mRNA 3'-end-processing factor FIP1 isoform X3 [Oreochromis aureus]	2126	517	1	80.9221	6.25313e-06	107.5	90.963	95.264	S	RHDS(1)EEGDSHR	RHDS(81)EEGDS(-81)HR	4	4	0.089688	3736;3737;7320	7439;7440;7441;7442;14866;14867;14868;14869;14870;14871;14872;14873	14866	F1	10463	0.34977	0.29129	0.15807	0.19361	0.35	0.29	0.2	0.17	0.32	0.04	0.125	0.185	0.02	0.1081	0.583	0.0046864	0.031286	down
4101	XP_031602933.1	pre-mRNA 3'-end-processing factor FIP1 isoform X4 [Oreochromis aureus]	2127	500	1	80.9221	6.25313e-06	107.5	90.963	95.264	S	RHDS(1)EEGDSHR	RHDS(81)EEGDS(-81)HR	4	4	0.089688	3736;3737;7320	7439;7440;7441;7442;14866;14867;14868;14869;14870;14871;14872;14873	14866	F1	10463	0.34977	0.29129	0.15807	0.19361	0.35	0.29	0.2	0.17	0.32	0.04	0.125	0.185	0.02	0.1081	0.583	0.0046864	0.031286	down
4131	XP_031603159.1	alpha- and gamma-adaptin-binding protein p34 [Oreochromis aureus]	2143	316	0.931913	11.0336	9.8699e-19	130.01	117.13	80.638	S	AFWMAIGGDEDEIDGLS(0.932)S(0.932)GEES(0.136)	AFWMAIGGDEDEIDGLS(11)S(11)GEES(-11)	17	3	-2.5351	334	720;721;722;723;724	721	F4	52928	0.22112	0.17971	0.24762	0.36339	0.22	0.18	0.31	0.31	0.2	0.03	0.15	0.31	0	0	1.566	0.00463492	0.0310499	up
4132	XP_031603159.1	alpha- and gamma-adaptin-binding protein p34 [Oreochromis aureus]	2143	317	0.931913	11.0336	9.8699e-19	130.01	117.13	80.638	S	AFWMAIGGDEDEIDGLS(0.932)S(0.932)GEES(0.136)	AFWMAIGGDEDEIDGLS(11)S(11)GEES(-11)	18	3	-2.5351	334	720;721;722;723;724	721	F4	52928	0.22112	0.17971	0.24762	0.36339	0.22	0.18	0.31	0.31	0.2	0.03	0.15	0.31	0	0	1.566	0.00463492	0.0310499	up
4139	XP_031603206.1	epidermal growth factor receptor kinase substrate 8-like protein 2 isoform X1 [Oreochromis aureus]	2148	228	0.980995	17.1783	0.00058548	62.104	43.739	62.104	S	AFRQS(0.981)DS(0.019)ESHEK	AFRQS(17)DS(-17)ES(-37)HEK	5	4	0.44497	322	706	706	F3	20761	0.17937	0.19474	0.24152	0.38437	0.18	0.19	0.3	0.33	0.185	0.01	0.0541	0.315	0.02	0.0635	1.704	0.000457002	0.00940266	up
4143	XP_031603206.1	epidermal growth factor receptor kinase substrate 8-like protein 2 isoform X1 [Oreochromis aureus]	2148	23	0.863359	8.46951	0.0346233	42.336	12.526	42.336	S	S(0.123)DS(0.863)KLS(0.014)AK	S(-8.5)DS(8.5)KLS(-18)AK	3	3	2.9376	8153	16683	16683	F3	24700	0.15794	0.20731	0.29293	0.34182	0.16	0.21	0.37	0.29	0.185	0.04	0.2162	0.33	0.06	0.1818	1.817	0.0117688	0.0489033	up
4153	XP_031603238.1	death-associated protein kinase 2 isoform X1 [Oreochromis aureus]	2155	294	1	105.314	2.70322e-05	105.31	70.426	105.31	S	RLS(1)VVNLENFK	RLS(110)VVNLENFK	3	3	1.1717	7495	15239;15240	15240	F6	43962	0.18988	0.16358	0.29536	0.35118	0.19	0.16	0.37	0.3	0.175	0.02	0.1143	0.335	0.05	0.1493	1.928	0.00369299	0.0263433	up
4177	XP_039467839.1	SLIT-ROBO Rho GTPase-activating protein 2 isoform X4 [Oreochromis aureus]	2176	899	1	70.9287	0.0267411	70.929	24.906	70.929	S	VES(1)PQLR	VES(71)PQLR	3	2	1.2515	10728	22127	22127	F2	29673	0.18365	0.2021	0.23444	0.37982	0.18	0.2	0.29	0.33	0.19	0.01	0.0526	0.31	0.03	0.0968	1.636	0.0020297	0.0205747	up
4198	XP_031603611.1	eukaryotic translation initiation factor 4Ba isoform X3 [Oreochromis aureus]	2186	542	0.999804	37.0695	1.03627e-26	144.68	116.35	144.68	S	APIS(1)PVS(1)PGGSAPPK	APIS(78)PVS(37)PGGS(-37)APPK	7	2	0.20513	696	1527;1528;1529;1530;1534;1535;1537	1528	F3	38073	0.64381	0.58521	0.32124	0.45604	0.64	0.58	0.4	0.39	0.61	0.04	0.0656	0.395	0.01	0.0253	0.649	0.000681261	0.0120588	down
4207	XP_031603611.1	eukaryotic translation initiation factor 4Ba isoform X3 [Oreochromis aureus]	2186	529	0.998514	28.3244	3.06349e-20	135.89	109.85	87.138	S	SAAST(0.001)GS(0.999)NEGDGR	S(-64)AAS(-48)T(-28)GS(28)NEGDGR	7	3	-0.062112	7910	16156;16157;16158	16157	F1	11261	0.38958	0.28196	0.12166	0.2068	0.39	0.28	0.15	0.18	0.335	0.08	0.2388	0.165	0.02	0.1212	0.506	0.00771499	0.0391862	down
4217	XP_031603628.1	signal peptidase complex subunit 1 [Oreochromis aureus]	2190	95	0.787379	6.77215	3.36601e-18	115.92	104.97	115.92	S	NPLSWQPALPESTAEPS(0.047)QKPQES(0.787)T(0.166)K	NPLS(-110)WQPALPES(-50)T(-44)AEPS(-12)QKPQES(6.8)T(-6.8)K	23	4	1.217	6390;6391	12791	12791	F6	42565	0.16609	0.2133	0.28109	0.33953	0.16	0.21	0.35	0.29	0.185	0.04	0.2162	0.32	0.04	0.1250	1.762	0.0102446	0.0474565	up
4218	XP_031603637.1	aquaporin-7 [Oreochromis aureus]	2191	7	1	101.009	2.81807e-05	101.01	72.203	101.01	S	DLAQS(1)VEVGVFQQR	DLAQS(100)VEVGVFQQR	5	2	1.4598	1378	2784;2785	2785	F4	47498	0.17597	0.21044	0.23178	0.38182	0.17	0.21	0.29	0.33	0.19	0.03	0.1579	0.31	0.03	0.0968	1.65	0.00624937	0.0354269	up
4242	XP_031603773.1	Golgi-specific brefeldin A-resistance guanine nucleotide exchange factor 1 isoform X2 [Oreochromis aureus]	2205	233	1	55.6761	0.0295808	55.676	17.949	55.676	S	S(1)PRPPR	S(56)PRPPR	1	3	0.18895	8987	18421;18422	18422	F3	12778	0.1893	0.19458	0.25198	0.36414	0.19	0.19	0.32	0.31	0.19	0	0	0.315	0.01	0.0317	1.658	1.26632e-05	0.000920355	up
4300	XP_031603949.1	ATP-dependent Clp protease ATP-binding subunit clpX-like, mitochondrial isoform X2 [Oreochromis aureus]	2225	594	1	126.088	0	261.59	246.45	261.59	S	DSAEEEYDS(1)GIEEDNWPR	DS(-130)AEEEY(-130)DS(130)GIEEDNWPR	9	2	-0.42707	1539;10195	3107;3108;21009;21010	3108	F2	44135	0.33239	0.29455	0.17047	0.2231	0.33	0.29	0.21	0.19	0.31	0.03	0.0968	0.2	0.01	0.0500	0.648	0.00263406	0.0230964	down
4310	XP_039475517.1	myelin basic protein-like isoform X2 [Oreochromis aureus]	2232	18	0.998748	29.0198	0.000794289	55.094	14.132	55.094	S	EPHT(0.001)DGKAPS(0.999)PEPK	EPHT(-29)DGKAPS(29)PEPK	10	4	0.60237	2160;4616	4309;9359	4309	F3	23847	0.19348	0.18483	0.28185	0.33983	0.19	0.18	0.35	0.29	0.185	0.01	0.0541	0.32	0.04	0.1250	1.731	0.00237868	0.022708	up
4326	XP_031604117.2	coatomer subunit alpha [Oreochromis aureus]	2241	400	0.57878	1.38005	0.000927554	56.817	33.212	56.817	S	ES(0.579)DS(0.421)QNPDAPEGK	ES(1.4)DS(-1.4)QNPDAPEGK	2	3	1.604	2272	4509	4509	F1	21115	0.35328	0.31372	0.13968	0.19332	0.35	0.31	0.18	0.17	0.33	0.03	0.0909	0.175	0.01	0.0571	0.532	0.000498301	0.00977137	down
4346	XP_031604241.1	DNA topoisomerase 2-beta isoform X2 [Oreochromis aureus]	2258	1557	0.999986	48.9447	9.58691e-18	97.639	83.046	97.639	S	KPQKPPS(1)DDEDDSNSMSGLSALTR	KPQKPPS(49)DDEDDS(-49)NS(-60)MS(-75)GLS(-83)ALT(-88)R	7	4	0.93617	4857	9825	9825	F4	37901	0.18533	0.21822	0.25413	0.34232	0.18	0.22	0.32	0.29	0.2	0.03	0.15	0.305	0.02	0.0656	1.541	0.00708792	0.0372173	up
4382	XP_031604476.1	lamin-A [Oreochromis aureus]	2275	498	0.534259	0.59612	0.000121946	84.169	50.76	84.169	S	QVGNS(0.534)T(0.466)PIVYK	QVGNS(0.6)T(-0.6)PIVY(-51)K	5	2	1.5782	7053	14235	14235	F4	34694	0.19293	0.2104	0.24886	0.34781	0.19	0.21	0.31	0.3	0.2	0.01	0.05	0.305	0.01	0.0328	1.529	0.000803144	0.0129703	up
4438	XP_039472284.1	glycerol-3-phosphate acyltransferase 1, mitochondrial [Oreochromis aureus]	2305	684	0.553954	0.940934	4.31821e-35	142.32	113.35	142.32	S	FAEPLS(0.554)WRS(0.446)DEEDEDSDFGEEQR	FAEPLS(0.94)WRS(-0.94)DEEDEDS(-73)DFGEEQR	6	3	-1.4817	2460;4627	4848	4848	F3	50621	0.35819	0.27822	0.13804	0.22555	0.35	0.28	0.17	0.19	0.315	0.05	0.1587	0.18	0.01	0.0556	0.579	0.00453782	0.0306661	down
4452	XP_031604963.1	far upstream element-binding protein 3-like isoform X3 [Oreochromis aureus]	2309	351	0.997539	26.0785	3.70946e-32	143.9	123.46	143.9	S	GDWT(0.002)MGS(0.998)PGPLQEVTYTIPADK	GDWT(-26)MGS(26)PGPLQEVT(-80)Y(-87)T(-94)IPADK	7	3	2.052	2915;3399	5680;5681;5682;5683;5684;5685;5686	5685	F5	48360	0.20641	0.20563	0.23094	0.36309	0.2	0.2	0.29	0.31	0.2	0	0	0.3	0.01	0.0333	1.5	0.000235213	0.00716239	up
4459	XP_039473035.1	WW domain-containing adapter protein with coiled-coil isoform X4 [Oreochromis aureus]	2312	303	0.999894	39.7498	0.0336197	75.243	32.329	75.243	S	SYVS(1)PR	S(-40)Y(-63)VS(40)PR	4	2	1.6759	9749	20002	20002	F2	22390	0.14345	0.14901	0.30815	0.39939	0.14	0.15	0.39	0.34	0.145	0.01	0.069	0.365	0.04	0.1096	2.52	0.000243184	0.00720781	up
4494	XP_031605128.1	ataxin-2-like protein [Oreochromis aureus]	2321	300	0.999177	30.8442	0.0276978	65.03	50.018	65.03	S	GRDS(0.999)PGAS(0.001)NR	GRDS(31)PGAS(-31)NR	4	2	-0.058771	3393	6730	6730	F2	7066	0.14624	0.13134	0.25438	0.46803	0.14	0.13	0.32	0.4	0.135	0.01	0.0741	0.36	0.06	0.1667	2.671	0.000729147	0.0125668	up
4496	XP_031605128.1	ataxin-2-like protein [Oreochromis aureus]	2321	672	0.78284	5.56973	0.00984632	49.266	35.611	49.266	S	QS(0.025)PAT(0.974)PQPART(0.218)PGS(0.783)EEVR	QS(-16)PAT(16)PQPART(-5.6)PGS(5.6)EEVR	14	3	-0.49647	6981	14043	14043	F2	25793	0.18694	0.19566	0.23935	0.37805	0.19	0.19	0.3	0.33	0.19	0	0	0.315	0.02	0.0635	1.658	0.000354702	0.00940266	up
4497	XP_031605128.1	ataxin-2-like protein [Oreochromis aureus]	2321	534	0.815424	7.58172	0.00869071	41.378	22.545	41.378	S	S(0.815)GES(0.142)PS(0.035)T(0.006)T(0.002)EESK	S(7.6)GES(-7.6)PS(-14)T(-21)T(-27)EES(-36)K	1	3	3.0255	8364	17096	17096	F2	21298	0.18023	0.21822	0.24972	0.35182	0.18	0.22	0.31	0.3	0.2	0.03	0.15	0.305	0.01	0.0328	1.54	0.00535383	0.0322031	up
4498	XP_031605128.1	ataxin-2-like protein [Oreochromis aureus]	2321	537	0.927002	13.3547	0.000420469	67.838	48.74	56.139	S	S(0.014)GES(0.927)PS(0.043)T(0.012)T(0.004)EESK	S(-18)GES(13)PS(-13)T(-19)T(-24)EES(-34)K	4	2	2.2286	8364	17094;17095	17095	F1	19088	0.1775	0.1821	0.24525	0.39516	0.18	0.18	0.31	0.34	0.18	0	0	0.325	0.02	0.0615	1.806	0.00020363	0.00684975	up
4527	XP_031605292.1	heterogeneous nuclear ribonucleoprotein L-like isoform X2 [Oreochromis aureus]	2333	121	0.972546	16.6453	0.0138006	44.294	37.761	44.294	S	IS(0.021)RPGDS(0.973)DDS(0.006)R	IS(-17)RPGDS(17)DDS(-22)R	7	3	-1.8657	4418	8920	8920	F2	20423	0.32075	0.33193	0.12885	0.21846	0.32	0.33	0.16	0.19	0.325	0.01	0.0308	0.175	0.02	0.1143	0.539	0.00114874	0.0159874	down
4589	XP_039475101.1	leucine-rich repeat transmembrane protein FLRT1 [Oreochromis aureus]	2368	641	0.85123	7.57531	0.0022613	87.806	29.948	87.806	S	DT(0.149)S(0.851)ILEIR	DT(-7.6)S(7.6)ILEIR	3	2	1.3983	1623;4595	3273;9270	3273	F3	45663	0.15092	0.17251	0.25307	0.42349	0.15	0.17	0.32	0.36	0.16	0.01	0.0625	0.34	0.03	0.0882	2.133	0.000620111	0.011136	up
4602	XP_031605698.1	E3 ubiquitin-protein ligase synoviolin [Oreochromis aureus]	2378	540	0.798447	5.97916	1.17204e-239	225.36	193.23	225.36	S	AGS(0.798)T(0.202)GEASGTNHTASSSTAGSNTESPSTER	AGS(6)T(-6)GEAS(-46)GT(-51)NHT(-79)AS(-110)S(-120)S(-130)T(-150)AGS(-170)NT(-180)ES(-190)PS(-210)T(-210)ER	3	3	-2.6716	401	849	849	F2	19687	0.30662	0.33294	0.12565	0.23479	0.3	0.33	0.16	0.2	0.315	0.02	0.0635	0.18	0.03	0.1667	0.573	0.00399985	0.0280015	down
4682	XP_031606153.2	rab GTPase-binding effector protein 1 isoform X2 [Oreochromis aureus]	2420	579	1	44.105	0.0118948	44.105	13.689	44.105	S	QNLEDS(1)VKAGNEET(1)AAK	QNLEDS(44)VKAGNEET(44)AAK	6	4	2.5355	6868	13755	13755	F2	25057	0.3785	0.29497	0.1329	0.19363	0.37	0.29	0.17	0.17	0.33	0.06	0.1818	0.17	0	0	0.522	0.00262212	0.0230964	down
4698	XP_031606171.2	uncharacterized protein uimc1 isoform X4 [Oreochromis aureus]	2424	856	0.991615	20.7285	0.00105724	59.814	45.908	59.814	S	ACRVS(0.992)NEDT(0.008)NDGADVGR	ACRVS(21)NEDT(-21)NDGADVGR	5	3	0.18865	149	289	289	F1	20283	0.30664	0.38617	0.12793	0.17926	0.3	0.38	0.16	0.15	0.34	0.06	0.1765	0.155	0.01	0.0645	0.462	0.00158852	0.0175581	down
4706	XP_031606190.2	protein FAM114A2 isoform X2 [Oreochromis aureus]	2428	24	1	63.2566	2.76937e-05	89.301	58.411	63.257	S	QNPS(1)PAGT(1)PDR	QNPS(63)PAGT(63)PDR	4	2	2.8259	6869	13756;13759;13760;13761	13756	F1	13243	0.282244	0.40139	0.56334	0.75304	0.28	0.4	0.71	0.65	0.34	0.08	0.2353	0.68	0.04	0.0588	2.064	0.0068578	0.0372173	up
4716	XP_031606287.1	G-protein coupled receptor family C group 5 member C isoform X2 [Oreochromis aureus]	2434	306	0.851979	7.60106	3.71392e-40	156.17	133.29	156.17	S	GQS(0.852)S(0.148)QNVYVENK	GQS(7.6)S(-7.6)QNVY(-98)VENK	3	3	0.71333	3384	6711;6714;6715;6716	6714	F3	31699	0.19157	0.20392	0.23428	0.37526	0.19	0.2	0.29	0.32	0.195	0.01	0.0513	0.305	0.02	0.0656	1.565	0.000800215	0.0129703	up
4723	XP_031606307.1	Golgi apparatus membrane protein TVP23 homolog B isoform X1 [Oreochromis aureus]	2437	195	0.999301	32.4876	0.000222865	85.522	60.669	85.522	S	QT(0.001)LS(0.999)KEEES	QT(-32)LS(32)KEEES(-39)	4	3	-0.52138	7030	14192;14193	14193	F2	26861	0.39932	0.29884	0.12609	0.17574	0.4	0.3	0.16	0.15	0.35	0.07	0.2	0.155	0.01	0.0645	0.452	0.00249701	0.0230964	down
4738	XP_031606438.1	periphilin-1 isoform X8 [Oreochromis aureus]	2444	183	0.999002	30.0041	0.0075551	54.7	30.356	54.7	S	EVARS(0.999)PHS(0.001)R	EVARS(30)PHS(-30)R	5	3	0.1468	2381	4694	4694	F2	10500	0.22318	0.20517	0.32853	0.43096	0.22	0.2	0.41	0.37	0.21	0.01	0.0476	0.39	0.03	0.0769	1.861	0.000604769	0.0109369	up
4767	XP_031606581.1	receptor-type tyrosine-protein phosphatase epsilon isoform X6 [Oreochromis aureus]	2457	5	0.976621	17.6496	0.0178857	45.077	23.571	45.077	S	KNS(0.977)FS(0.017)S(0.007)FR	KNS(18)FS(-18)S(-22)FR	3	3	1.7598	4824	9766	9766	F5	29358	0.21554	0.17451	0.23644	0.37351	0.21	0.17	0.3	0.32	0.19	0.03	0.1579	0.31	0.01	0.0323	1.65	0.00444101	0.0301441	up
4788	XP_031606762.1	uncharacterized protein akt1s1 [Oreochromis aureus]	2474	349	1	80.3867	4.07011e-05	80.387	62.721	80.387	S	LNT(1)GDFS(1)LKQ	LNT(80)GDFS(80)LKQ	7	3	0.088734	5600	11254;11255;11256	11254	F3	44590	0.67815	0.70109	0.226143	0.39461	0.67	0.69	0.28	0.34	0.68	0.01	0.0147	0.31	0.04	0.1290	0.456	0.000791619	0.0129703	down
4789	XP_031606762.1	uncharacterized protein akt1s1 [Oreochromis aureus]	2474	319	1	85.6614	5.03051e-05	92.264	65.235	92.264	S	SGCADLEHIAAS(1)MK	S(-86)GCADLEHIAAS(86)MK	12	4	0.41173	8349	17037;17038	17038	F3	42952	0.34434	0.31169	0.14743	0.19654	0.34	0.31	0.19	0.17	0.325	0.02	0.0615	0.18	0.01	0.0556	0.555	0.00076428	0.0128559	down
4790	XP_031606762.1	uncharacterized protein akt1s1 [Oreochromis aureus]	2474	282	0.999984	47.8732	0.000245952	108.56	81.235	108.56	S	S(1)LPVSVPVWGCR	S(48)LPVS(-48)VPVWGCR	1	2	0.22965	8749	17816;17817;17818;17819	17818	F6	46616	0.37851	0.29397	0.13791	0.20703	0.37	0.29	0.17	0.18	0.33	0.06	0.1818	0.175	0.01	0.0571	0.538	0.00324916	0.02531	down
4799	XP_039459459.1	la-related protein 1B isoform X5 [Oreochromis aureus]	2476	1010	0.891718	9.27048	0.00361043	70.438	46.587	70.438	S	RT(0.119)S(0.892)S(0.755)S(0.234)AGDEGR	RT(-9.3)S(9.3)S(5.1)S(-5.1)AGDEGR	3	2	-0.84861	7827;10413	15938;15940;21466	15940	F2	8863	0.57318	0.69056	0.30021	0.43605	0.57	0.68	0.38	0.38	0.625	0.08	0.128	0.38	0	0	0.613	0.00234482	0.022507	down
4825	XP_031606875.1	putative monooxygenase p33MONOX [Oreochromis aureus]	2485	90	1	52.255	2.93917e-39	151.82	137.77	52.255	S	S(1)PGPVVK	S(52)PGPVVK	1	3	1.8156	5544;8946	11139;18349	18349	F3	28498	0.21312	0.19706	0.24441	0.34541	0.21	0.19	0.31	0.3	0.2	0.01	0.05	0.305	0.01	0.0328	1.529	0.000803144	0.0129703	up
4833	XP_031606953.1	TGF-beta-activated kinase 1 and MAP3K7-binding protein 1 isoform X7 [Oreochromis aureus]	2492	196	0.913954	13.0321	3.81667e-18	91.942	68.267	91.942	S	S(0.045)S(0.041)S(0.914)DGQNQVLQIGRPHSTDNEDELQR	S(-13)S(-14)S(13)DGQNQVLQIGRPHS(-66)T(-66)DNEDELQR	3	3	-1.6263	9372	19245	19245	F3	37876	0.35488	0.3258	0.14591	0.17342	0.35	0.32	0.18	0.15	0.335	0.02	0.0597	0.165	0.02	0.1212	0.494	0.00118003	0.0159874	down
4834	XP_031606966.1	nucleophosmin 1a [Oreochromis aureus]	2493	145	1	57.8017	0.00879568	57.802	41.741	57.802	S	KRPAAS(1)PAAK	KRPAAS(58)PAAK	6	3	2.6254	4929	9975;9976	9976	F4	16769	0.11085	0.1205	0.2453	0.52335	0.11	0.12	0.31	0.45	0.115	0.01	0.087	0.38	0.10	0.2632	3.311	0.00176067	0.0188917	up
4841	XP_031607022.1	copper-transporting ATPase 1 [Oreochromis aureus]	2498	166	0.834397	7.26891	2.57901e-05	89.189	30.512	89.189	S	DPT(0.001)S(0.156)S(0.834)PS(0.008)QTTR	DPT(-31)S(-7.3)S(7.3)PS(-20)QT(-34)T(-41)R	5	2	0.38826	1491	3015	3015	F2	16048	0.18397	0.17297	0.26732	0.37574	0.18	0.17	0.34	0.32	0.175	0.01	0.0571	0.33	0.01	0.0303	1.887	0.000119299	0.00545972	up
4844	XP_031607024.1	60S ribosomal protein L3 [Oreochromis aureus]	2500	7	1	61.9623	0.0161372	61.962	39.814	61.962	S	KFS(1)APR	KFS(62)APR	3	3	-0.34617	4636	9391	9391	F4	26611	0.37181	0.28392	0.15058	0.20007	0.37	0.28	0.19	0.17	0.325	0.06	0.1846	0.18	0.01	0.0556	0.565	0.0067564	0.0372173	down
4871	XP_031607165.1	target of rapamycin complex 2 subunit MAPKAP1 [Oreochromis aureus]	2521	124	0.969319	15.7766	2.01724e-20	137.99	117.61	137.99	S	AS(0.005)S(0.026)QS(0.969)VEDLGSLFEK	AS(-23)S(-16)QS(16)VEDLGS(-96)LFEK	5	3	1.0423	883	1909	1909	F4	50281	0.21333	0.18478	0.24248	0.35941	0.21	0.18	0.31	0.31	0.195	0.02	0.1026	0.31	0	0	1.599	0.00185483	0.0193526	up
4946	XP_031607568.1	beta-enolase [Oreochromis aureus]	2561	282	0.999988	49.2844	7.17973e-06	91.62	62.076	91.62	S	LGDLYRS(1)FIK	LGDLY(-49)RS(49)FIK	7	3	-0.63621	5315	10707	10707	F6	46414	0.32442	0.34172	0.10373	0.23013	0.32	0.34	0.13	0.2	0.33	0.01	0.0303	0.165	0.05	0.3030	0.5	0.0107343	0.047895	down
5015	XP_031607990.1	poly(A)-specific ribonuclease PARN [Oreochromis aureus]	2597	555	1	87.8271	3.91049e-33	113.51	102.11	113.51	S	S(1)IS(1)PMQGEQGADDAQITDGWSHYSYPDTTGTK	S(88)IS(88)PMQGEQGADDAQIT(-88)DGWS(-94)HY(-94)S(-94)Y(-94)PDT(-100)T(-100)GT(-110)K	1	4	-1.3324	8576;8577	17519;17521	17521	F4	47752	0.28963	0.31277	0.1628	0.2348	0.29	0.31	0.2	0.2	0.3	0.01	0.0333	0.2	0	0	0.667	0.000243254	0.00720781	down
5037	XP_031608133.1	ras GTPase-activating protein-binding protein 2 isoform X2 [Oreochromis aureus]	2614	228	0.975026	15.924	1.26564e-14	80.239	67.562	80.239	S	APS(0.975)PVPVES(0.025)PPNTLEPPKPFSWALVTSK	APS(16)PVPVES(-16)PPNT(-43)LEPPKPFS(-62)WALVT(-67)S(-72)K	3	4	3.0647	722	1603	1603	F1	48005	0.16484	0.20253	0.21985	0.41278	0.16	0.2	0.28	0.36	0.18	0.03	0.1667	0.32	0.06	0.1875	1.8	0.00966015	0.0458262	up
5060	XP_031608197.2	AT-rich interactive domain-containing protein 1A isoform X1 [Oreochromis aureus]	2622	293	0.995214	24.0367	0.000107253	70.452	46.261	70.452	S	SHHPS(0.004)PMS(0.995)PGS(0.001)AGQPLAR	S(-46)HHPS(-24)PMS(24)PGS(-31)AGQPLAR	8	3	-0.57773	8473	17309;17310	17309	F4	19932	0.1971	0.18934	0.26378	0.34978	0.2	0.19	0.33	0.3	0.195	0.01	0.0513	0.315	0.02	0.0635	1.617	0.000604494	0.0109369	up
5061	XP_031608197.2	AT-rich interactive domain-containing protein 1A isoform X1 [Oreochromis aureus]	2622	309	0.999184	30.8774	0.0124699	49.081	30.301	49.081	S	T(0.001)QPPGS(0.999)MDPMGK	T(-31)QPPGS(31)MDPMGK	6	2	-0.08124	10284	21196	21196	F2	22937	0.40753	0.2897	0.1405	0.16227	0.4	0.29	0.18	0.14	0.345	0.08	0.2319	0.16	0.03	0.1875	0.476	0.00748951	0.0389652	down
5078	XP_031608276.1	transcription elongation factor A protein 3 isoform X2 [Oreochromis aureus]	2636	504	0.848956	9.33971	0.00640391	44.294	19.501	44.294	S	HS(0.052)ADRRES(0.849)T(0.099)DSK	HS(-12)ADRRES(9.3)T(-9.3)DS(-34)K	8	4	3.151	3958	7927	7927	F3	8499	0.14898	0.13576	0.31906	0.39619	0.15	0.13	0.4	0.34	0.14	0.01	0.0714	0.37	0.04	0.1081	2.656	0.00057886	0.0105676	up
5114	XP_031608476.1	mitochondrial fission factor homolog B isoform X2 [Oreochromis aureus]	2653	140	0.998936	29.7273	0.00111279	70.529	50.148	70.529	S	ERS(0.999)AS(0.001)ENAAVR	ERS(30)AS(-30)ENAAVR	3	3	0.34126	2250;7992	4466	4466	F2	15755	0.18775	0.20981	0.26428	0.33816	0.19	0.21	0.33	0.29	0.2	0.01	0.05	0.31	0.03	0.0968	1.554	0.00265884	0.0230964	up
5175	XP_031608862.1	Na(+)/H(+) exchange regulatory cofactor NHE-RF1a [Oreochromis aureus]	2683	149	0.814845	7.21599	0.0036086	65.305	36.156	46.131	S	S(0.045)ERHS(0.877)VS(0.25)S(0.815)S(0.802)T(0.211)KEER	S(-14)ERHS(10)VS(-7.2)S(7.2)S(6.7)T(-6.7)KEER	8	4	-3.4351	4007;8260;8261	8037;16878	16878	F1	15872	0.35599	0.3147	0.15151	0.17781	0.35	0.31	0.19	0.15	0.33	0.03	0.0909	0.17	0.03	0.1765	0.517	0.00316745	0.0247736	down
5176	XP_031608862.1	Na(+)/H(+) exchange regulatory cofactor NHE-RF1a [Oreochromis aureus]	2683	150	0.802122	6.74609	0.0036086	46.131	34.518	46.131	S	S(0.045)ERHS(0.877)VS(0.25)S(0.815)S(0.802)T(0.211)KEER	S(-14)ERHS(10)VS(-7.2)S(7.2)S(6.7)T(-6.7)KEER	9	4	-3.4351	4007;8260;8261	16878	16878	F1	15872	0.35599	0.3147	0.15151	0.17781	0.35	0.31	0.19	0.15	0.33	0.03	0.0909	0.17	0.03	0.1765	0.517	0.00316745	0.0247736	down
5244	XP_031609070.1	guanine nucleotide-binding protein G(I)/G(S)/G(O) subunit gamma-10 [Oreochromis aureus]	2704	25	1	47.8688	0.0234993	47.869	29.429	47.869	S	FEAS(1)IRR	FEAS(48)IRR	4	3	-0.65482	2493	4900	4900	F3	30887	0.12498	0.14263	0.26827	0.46412	0.12	0.14	0.34	0.4	0.13	0.01	0.0769	0.37	0.04	0.1081	2.863	0.000513152	0.00977137	up
5264	XP_031609125.1	ethanolamine-phosphate cytidylyltransferase [Oreochromis aureus]	2714	23	0.72153	2.58082	0.0015138	49.973	28.575	49.973	S	EEADCT(0.03)KPGS(0.722)S(0.744)ACS(0.505)PEK	EEADCT(-16)KPGS(2.6)S(3)ACS(-2.6)PEK	10	3	-0.80422	1850	3674	3674	F2	28145	0.28641	0.34102	0.1478	0.22477	0.28	0.34	0.19	0.19	0.31	0.04	0.129	0.19	0	0	0.619	0.00327351	0.0253985	down
5265	XP_031609125.1	ethanolamine-phosphate cytidylyltransferase [Oreochromis aureus]	2714	24	0.744132	2.99076	0.0015138	49.973	28.575	49.973	S	EEADCT(0.03)KPGS(0.722)S(0.744)ACS(0.505)PEK	EEADCT(-16)KPGS(2.6)S(3)ACS(-2.6)PEK	11	3	-0.80422	1850	3674	3674	F2	28145	0.28641	0.34102	0.1478	0.22477	0.28	0.34	0.19	0.19	0.31	0.04	0.129	0.19	0	0	0.619	0.00327351	0.0253985	down
5266	XP_031609125.1	ethanolamine-phosphate cytidylyltransferase [Oreochromis aureus]	2714	27	0.960934	16.9326	0.000636075	53.059	37.294	53.059	S	EEADCTKPGS(0.019)S(0.019)ACS(0.961)PEK	EEADCT(-37)KPGS(-17)S(-17)ACS(17)PEK	14	4	-1.2012	1850	3672;3673;3674	3672	F2	27305	0.61085	0.63864	0.3008	0.4497	0.6	0.63	0.38	0.39	0.615	0.02	0.0325	0.385	0.01	0.0260	0.626	8.73134e-05	0.00456002	down
5307	XP_031609246.1	RNA-binding protein 7 [Oreochromis aureus]	2728	96	0.96588	13.6319	1.48855e-18	89.793	78.917	89.793	S	SGSSHCSNPGNS(0.966)QNT(0.237)S(0.794)PAS(0.002)T(0.001)PNPHGQR	S(-50)GS(-50)S(-50)HCS(-36)NPGNS(14)QNT(-5.7)S(5.7)PAS(-26)T(-32)PNPHGQR	12	4	-1.1355	8441	17242	17242	F3	15008	0.30828	0.34287	0.1487	0.20015	0.31	0.34	0.19	0.17	0.325	0.02	0.0615	0.18	0.01	0.0556	0.555	0.00076428	0.0128559	down
5325	XP_031609321.1	kynurenine formamidase [Oreochromis aureus]	2738	25	1	64.5504	0.000328888	81.494	65.955	64.55	S	RMS(1)ADDVIK	RMS(65)ADDVIK	3	3	-0.94534	7498	15245;15246;15247;15248;15249;15250;15251;15252;15253	15253	F6	29969	0.32354	0.28225	0.14566	0.22617	0.32	0.28	0.18	0.19	0.3	0.03	0.1	0.185	0.01	0.0541	0.619	0.00141059	0.0168973	down
5351	XP_031609347.2	zinc finger CCCH domain-containing protein 18 isoform X1 [Oreochromis aureus]	2742	286	1	64.6504	0.00313642	64.65	41.275	64.65	S	IRQDS(1)FRDK	IRQDS(65)FRDK	5	4	-0.63417	4377	8845	8845	F3	27438	0.35173	0.28637	0.15901	0.20289	0.35	0.28	0.2	0.17	0.315	0.05	0.1587	0.185	0.02	0.1081	0.595	0.00690097	0.0372173	down
5370	XP_039458956.1	eukaryotic translation initiation factor 5 [Oreochromis aureus]	2750	225	0.764833	5.1219	0.013923	40.137	21.304	40.137	S	NLT(0.235)LS(0.765)EDLEKPLEDR	NLT(-5.1)LS(5.1)EDLEKPLEDR	5	3	1.4271	6354	12718	12718	F3	49759	0.29946	0.32969	0.14315	0.2277	0.3	0.33	0.18	0.2	0.315	0.02	0.0635	0.19	0.01	0.0526	0.605	0.00117026	0.0159874	down
5376	XP_039463295.1	multifunctional protein ADE2 isoform X2 [Oreochromis aureus]	2756	132	0.996727	24.8366	0.00179967	76.282	31.857	76.282	S	VAT(0.003)GS(0.997)FLK	VAT(-25)GS(25)FLK	5	3	0.51071	10617	21886	21886	F4	41108	0.26848	0.34357	0.16652	0.22142	0.27	0.34	0.21	0.19	0.305	0.05	0.1639	0.2	0.01	0.0500	0.665	0.0105079	0.0476756	down
5424	XP_031609682.1	protein PRRC2C [Oreochromis aureus]	2784	2600	0.956093	14.5028	0.00075186	101.72	73.857	101.72	S	AS(0.001)S(0.005)T(0.034)S(0.956)PS(0.003)S(0.001)QSSK	AS(-31)S(-23)T(-15)S(15)PS(-24)S(-30)QS(-43)S(-48)K	5	2	2.4032	890	1920	1920	F2	16080	0.18024	0.18065	0.26144	0.37766	0.18	0.18	0.33	0.33	0.18	0	0	0.33	0	0	1.833	4.33142e-13	3.33693e-09	up
5474	XP_031609773.1	ubiquitin carboxyl-terminal hydrolase 24 isoform X3 [Oreochromis aureus]	2796	2537	0.8935	9.23817	2.37262e-157	202.66	181.71	202.66	S	T(0.106)IS(0.893)AQDTLAYATALLNEK	T(-9.2)IS(9.2)AQDT(-47)LAY(-130)AT(-150)ALLNEK	3	3	-0.68341	10045	20697;20698	20697	F6	48683	0.31835	0.28886	0.16062	0.23217	0.32	0.29	0.2	0.2	0.305	0.02	0.0656	0.2	0	0	0.657	0.00067938	0.0120588	down
5495	XP_031609840.1	protein transport protein Sec61 subunit beta [Oreochromis aureus]	2804	17	0.603457	3.85203	8.03079e-09	83.934	65.796	83.934	S	PGPAASATNVGAS(0.074)S(0.249)RS(0.603)PS(0.074)K	PGPAAS(-65)AT(-48)NVGAS(-9.1)S(-3.9)RS(3.9)PS(-9.1)K	16	3	-0.15431	6563;9003	13121	13121	F4	25494	0.33966	0.39288	0.11511	0.15235	0.34	0.39	0.14	0.13	0.365	0.04	0.1096	0.135	0.01	0.0741	0.371	0.000207164	0.00684975	down
5541	XP_031610118.1	peroxiredoxin-2 [Oreochromis aureus]	2828	180	0.994548	22.6108	6.23594e-20	133.29	111.41	133.29	S	YGEVCPAGWKPGS(0.995)DT(0.005)IVPDVQK	Y(-100)GEVCPAGWKPGS(23)DT(-23)IVPDVQK	13	3	0.12601	11391	23408;23409;23410;23411	23410	F5	43636	0.36897	0.5267	0.041525	0.05109	0.37	0.52	0.05	0.04	0.445	0.11	0.2472	0.045	0.01	0.2222	0.104	0.000294501	0.00820458	down
5569	XP_039458017.1	nuclear receptor coactivator 2-like isoform X4 [Oreochromis aureus]	2841	641	0.901179	10.1686	4.10422e-05	64.68	53.574	64.68	S	LEPS(0.012)DPCS(0.901)PT(0.087)GAFGDDQICK	LEPS(-19)DPCS(10)PT(-10)GAFGDDQICK	8	3	-0.5066	5259	10625;10626	10625	F3	47266	0.21651	0.1927	0.24886	0.34193	0.21	0.19	0.31	0.29	0.2	0.01	0.05	0.3	0.01	0.0333	1.504	0.00134686	0.0167301	up
5576	XP_031610287.1	protein transport protein Sec16A isoform X3 [Oreochromis aureus]	2843	1163	0.99807	30.5056	1.56111e-05	89.26	77.769	89.26	S	ASQY(0.001)S(0.998)DRPS(0.58)S(0.421)R	AS(-34)QY(-31)S(31)DRPS(1.4)S(-1.4)R	5	2	-0.46718	851	1851;1852	1851	F1	15736	0.1933	0.18462	0.23546	0.38662	0.19	0.18	0.3	0.33	0.185	0.01	0.0541	0.315	0.02	0.0635	1.704	0.000457002	0.00940266	up
5578	XP_031610287.1	protein transport protein Sec16A isoform X3 [Oreochromis aureus]	2843	1168	0.593428	1.8072	0.00218648	62.357	52.126	62.357	S	AS(0.01)QY(0.043)S(0.947)DRPS(0.405)S(0.593)R	AS(-20)QY(-14)S(14)DRPS(-1.8)S(1.8)R	10	2	-0.3579	851	1852	1852	F2	16804	0.19808	0.17391	0.27282	0.3552	0.2	0.17	0.34	0.31	0.185	0.02	0.1081	0.325	0.02	0.0615	1.768	0.00185421	0.0193526	up
5601	XP_031610312.1	protein PRRC2B isoform X5 [Oreochromis aureus]	2846	636	0.583113	2.37133	0.000624768	60.307	51.257	60.307	S	GSEEDGPEPS(0.583)S(0.338)PS(0.07)GDY(0.001)S(0.009)GR	GS(-41)EEDGPEPS(2.4)S(-2.4)PS(-9.2)GDY(-30)S(-18)GR	10	2	-0.12428	3430	6807	6807	F1	24067	0.38488	0.28011	0.13474	0.20026	0.38	0.28	0.17	0.17	0.33	0.07	0.2121	0.17	0	0	0.527	0.00513511	0.0322031	down
5614	XP_039471083.1	inactive phospholipid phosphatase 7 [Oreochromis aureus]	2850	53	0.995942	23.9003	4.60958e-06	115.56	102.76	115.56	S	HQT(0.004)S(0.996)QQSEEPTDR	HQT(-24)S(24)QQS(-61)EEPT(-81)DR	4	3	-2.7812	3939	7865;7866;7867	7865	F1	12781	0.27311	0.45074	0.10313	0.16539	0.27	0.45	0.13	0.14	0.36	0.13	0.3611	0.135	0.01	0.0741	0.4	0.00783035	0.0396354	down
5619	XP_031610355.1	5'-AMP-activated protein kinase catalytic subunit alpha-1 [Oreochromis aureus]	2852	383	0.991584	20.7124	9.53416e-06	113.29	94.213	113.29	S	VPFLVAET(0.008)PPRS(0.992)IR	VPFLVAET(-21)PPRS(21)IR	12	3	-0.72658	11028	22705;22706;22707	22707	F6	45435	0.20139	0.19037	0.2148	0.39482	0.2	0.19	0.27	0.34	0.195	0.01	0.0513	0.305	0.05	0.1639	1.565	0.00748646	0.0389652	up
5620	XP_031610364.1	Golgi phosphoprotein 3-like [Oreochromis aureus]	2854	30	1	68.2833	0.00758427	68.283	46.503	68.283	S	EKES(1)GGEEDEAR	EKES(68)GGEEDEAR	4	2	4.3253	2036	4078;4079	4079	F1	16106	0.075792	0.087228	0.29651	0.54047	0.08	0.09	0.37	0.47	0.085	0.01	0.1176	0.42	0.07	0.1667	4.958	0.000247148	0.00729513	up
5625	XP_031610371.1	ATP-dependent RNA helicase DHX29 [Oreochromis aureus]	2857	190	1	122.569	2.58614e-09	122.57	91.18	122.57	S	FQPPVHQKPAAQS(1)PK	FQPPVHQKPAAQS(120)PK	13	4	1.2122	2644	5168;5169	5169	F5	28311	0.16695	0.14991	0.26176	0.42138	0.17	0.15	0.33	0.36	0.16	0.01	0.0625	0.345	0.02	0.0580	2.165	0.000408109	0.00940266	up
5634	XP_031610396.1	protein ERGIC-53 [Oreochromis aureus]	2863	381	0.959074	13.9199	1.57261e-109	150.56	130.67	107.36	S	GT(0.002)NT(0.039)ES(0.959)GQLDSAGQQLGSIVATQQEVLK	GT(-27)NT(-14)ES(14)GQLDS(-49)AGQQLGS(-75)IVAT(-80)QQEVLK	6	4	-0.69536	3567;4685	7140;7141;9471	7140	F4	51289	0.3423	0.36487	0.10983	0.183	0.34	0.36	0.14	0.16	0.35	0.01	0.0286	0.15	0.01	0.0667	0.429	0.000263302	0.0076821	down
5638	XP_031610402.1	UV excision repair protein RAD23 homolog B [Oreochromis aureus]	2866	235	0.609757	1.96757	0.000150073	98.501	67.772	98.501	S	S(0.61)S(0.388)PS(0.003)AGGGNPLNFLR	S(2)S(-2)PS(-24)AGGGNPLNFLR	1	2	-0.031653	9336	19171	19171	F6	46707	0.13424	0.14598	0.2756	0.44418	0.13	0.14	0.35	0.38	0.135	0.01	0.0741	0.365	0.02	0.0548	2.707	7.28889e-05	0.00392683	up
5639	XP_031610402.1	UV excision repair protein RAD23 homolog B [Oreochromis aureus]	2866	236	0.561813	1.15398	1.25112e-05	94.922	78.699	94.922	S	S(0.431)S(0.562)PS(0.007)AGGGNPLNFLR	S(-1.2)S(1.2)PS(-19)AGGGNPLNFLR	2	3	0.23285	9336	19170	19170	F6	46694	0.17234	0.16776	0.2387	0.4212	0.17	0.17	0.3	0.36	0.17	0	0	0.33	0.04	0.1212	1.942	0.00109686	0.0159874	up
5697	XP_031610676.1	plasminogen activator inhibitor 1 RNA-binding protein-like isoform X2 [Oreochromis aureus]	2894	102	0.936331	11.675	1.8766e-11	82.157	52.022	79.365	S	RADQQGQS(0.064)GS(0.936)QHQGAQGEGRPGDK	RADQQGQS(-12)GS(12)QHQGAQGEGRPGDK	10	4	1.6583	7098	14342;14343	14343	F3	13120	0.18107	0.19439	0.21114	0.4134	0.18	0.19	0.27	0.36	0.185	0.01	0.0541	0.315	0.06	0.1905	1.704	0.00853369	0.0424426	up
5712	XP_031610806.2	DNA ligase 1 [Oreochromis aureus]	2907	59	1	79.0217	4.66993e-06	114.52	88.929	79.022	S	QILDS(1)DDDEAPVVK	QILDS(79)DDDEAPVVK	5	2	-0.13566	6769	13574;13575	13575	F2	42036	0.21731	0.17788	0.2297	0.37511	0.22	0.18	0.29	0.32	0.2	0.03	0.15	0.305	0.02	0.0656	1.541	0.00708792	0.0372173	up
5745	XP_031611011.1	chloride intracellular channel protein 5b isoform X1 [Oreochromis aureus]	2933	71	0.616887	4.31642	0.000131588	70.373	50.276	56.748	S	HSDS(0.002)S(0.01)S(0.024)S(0.073)S(0.228)S(0.617)DDEDAKT(0.046)R	HS(-35)DS(-25)S(-18)S(-14)S(-9.3)S(-4.3)S(4.3)DDEDAKT(-11)R	9	4	0.52217	3965;3966	7945	7945	F2	14042	0.16956	0.20482	0.24516	0.38046	0.17	0.2	0.31	0.33	0.185	0.02	0.1081	0.32	0.01	0.0312	1.741	0.00162758	0.0178362	up
5757	XP_031611049.1	band 4.1-like protein 2 isoform X4 [Oreochromis aureus]	2936	535	0.596634	1.70009	1.75934e-07	108.32	70.98	108.32	S	IS(0.597)RS(0.403)LDGAPMISITEAGR	IS(1.7)RS(-1.7)LDGAPMIS(-72)IT(-80)EAGR	2	3	0.19884	4419	8922	8922	F5	43766	0.30107	0.3197	0.13775	0.24148	0.3	0.32	0.17	0.21	0.31	0.01	0.0323	0.19	0.03	0.1579	0.613	0.00445727	0.0302278	down
5758	XP_031611049.1	band 4.1-like protein 2 isoform X4 [Oreochromis aureus]	2936	537	1	72.2899	0.000204683	100.23	68.797	100.23	S	S(1)LDGAPMISITEAGR	S(72)LDGAPMIS(-72)IT(-78)EAGR	1	2	-1.6414	4419;8673	17684;17685	17684	F4	48139	0.29414	0.32151	0.14407	0.24028	0.29	0.32	0.18	0.21	0.305	0.02	0.0656	0.195	0.02	0.1026	0.641	0.00342729	0.0256685	down
5764	XP_031611077.1	oxysterol-binding protein-related protein 11 [Oreochromis aureus]	2938	272	0.849385	7.52007	6.82186e-09	120.59	69.302	120.59	S	S(0.849)S(0.15)LGGPTIEWLEPK	S(7.5)S(-7.5)LGGPT(-35)IEWLEPK	1	2	-0.13638	9285	19026	19026	F5	47718	0.34318	0.2862	0.14635	0.22427	0.34	0.28	0.18	0.19	0.31	0.04	0.129	0.185	0.01	0.0541	0.603	0.0031329	0.0245782	down
5765	XP_031611077.1	oxysterol-binding protein-related protein 11 [Oreochromis aureus]	2938	273	0.567387	1.19668	1.19818e-20	138.39	111.05	138.39	S	S(0.431)S(0.567)LGGPT(0.002)IEWLEPK	S(-1.2)S(1.2)LGGPT(-25)IEWLEPK	2	3	1.1156	9285	19024	19024	F4	51439	0.33135	0.30988	0.14594	0.21283	0.33	0.31	0.18	0.18	0.32	0.01	0.0312	0.18	0	0	0.563	7.27547e-05	0.00392683	down
5875	XP_031611590.1	enhancer of mRNA-decapping protein 3 [Oreochromis aureus]	2983	202	0.994793	22.8467	0.00187695	63.727	47.836	63.727	S	S(0.995)RGT(0.993)PQEQT(0.011)PTR	S(23)RGT(22)PQEQT(-22)PT(-36)R	1	2	1.3164	9139	18712	18712	F1	13954	0.14917	0.2106	0.24272	0.3975	0.15	0.21	0.31	0.34	0.18	0.04	0.2222	0.325	0.02	0.0615	1.857	0.00930882	0.0447322	up
5898	XP_031611879.1	la-related protein 7 isoform X2 [Oreochromis aureus]	2997	290	0.884324	10.185	0.00132224	52.045	21.509	52.045	S	S(0.904)HT(0.171)AEGS(0.884)ES(0.041)DVPSK	S(9.5)HT(-9.5)AEGS(10)ES(-14)DVPS(-40)K	7	3	0.003986	8507	17376	17376	F1	23664	0.30893	0.34148	0.14625	0.20334	0.31	0.34	0.18	0.18	0.325	0.02	0.0615	0.18	0	0	0.555	0.000211407	0.00693055	down
5903	XP_031611884.2	perilipin-2 [Oreochromis aureus]	2999	223	0.980072	17.4588	0.00316565	95.608	42.114	95.608	S	LGS(0.018)LS(0.98)T(0.002)K	LGS(-17)LS(17)T(-26)K	5	3	2.0802	5361	10806	10806	F4	35693	0.20481	0.17203	0.25329	0.36987	0.2	0.17	0.32	0.32	0.185	0.02	0.1081	0.32	0	0	1.741	0.0013212	0.0167301	up
5922	XP_039477599.1	nuclear valosin-containing protein-like isoform X3 [Oreochromis aureus]	3011	802	0.776515	6.8684	1.16953e-05	75.358	52.63	75.358	S	S(0.064)S(0.16)AAS(0.777)PGHTHSSAADIR	S(-11)S(-6.9)AAS(6.9)PGHT(-42)HS(-51)S(-51)AADIR	5	3	-1.0985	9202	18865;18866	18865	F3	16857	0.20496	0.15772	0.26253	0.37479	0.2	0.16	0.33	0.32	0.18	0.03	0.1667	0.325	0.01	0.0308	1.828	0.00272897	0.0230964	up
5923	XP_031612030.1	vitellogenin-2 [Oreochromis aureus]	3012	1061	1	175.325	7.22288e-115	188.69	148.41	175.32	S	AIDMS(1)EEEEALEDKNVLLK	AIDMS(180)EEEEALEDKNVLLK	5	4	1.2191	454;455	983;984;985;986;987;988;989;990;991;992	992	F4	51018	0.35975	0.47242	0.090765	0.10541	0.36	0.47	0.11	0.09	0.415	0.08	0.1928	0.1	0.01	0.1000	0.245	0.00069505	0.0121421	down
5924	XP_031612030.1	vitellogenin-2 [Oreochromis aureus]	3012	1293	0.9376	11.7683	0.0100954	83.998	30.505	83.998	S	HAIS(0.938)T(0.062)QR	HAIS(12)T(-12)QR	4	2	-0.38321	3700	7373	7373	F2	14185	0.32538	0.48182	0.088012	0.10479	0.32	0.48	0.11	0.09	0.4	0.11	0.275	0.1	0.01	0.1000	0.261	0.00183195	0.0193152	down
5925	XP_031612030.1	vitellogenin-2 [Oreochromis aureus]	3012	1192	0.65912	4.73487	1.07649e-05	98.077	85.674	98.077	S	MADIVAPIIT(0.007)T(0.112)S(0.659)T(0.222)R	MADIVAPIIT(-20)T(-7.7)S(4.7)T(-4.7)R	12	3	-1.9882	5938	11873;11874	11873	F5	48468	0.28843	0.47173	0.07461	0.16523	0.29	0.47	0.09	0.14	0.38	0.13	0.3421	0.115	0.04	0.3478	0.321	0.00813503	0.0408022	down
5926	XP_031612030.1	vitellogenin-2 [Oreochromis aureus]	3012	953	0.618556	2.39368	1.47462e-06	69.857	55.087	69.857	S	MAS(0.619)S(0.376)VT(0.062)GGMS(0.904)AS(0.554)S(0.487)EIIPADLPSK	MAS(2.4)S(-2.4)VT(-13)GGMS(10)AS(0.71)S(-0.71)EIIPADLPS(-35)K	3	4	-2.4289	5950	11906	11906	F3	49817	0.32346	0.49486	0.08351	0.098176	0.32	0.49	0.11	0.08	0.405	0.12	0.2963	0.095	0.02	0.2105	0.245	0.00259046	0.0230964	down
5927	XP_031612030.1	vitellogenin-2 [Oreochromis aureus]	3012	954	0.617755	6.33455	3.83529e-08	68.386	54.554	68.386	S	MAS(0.258)S(0.618)VT(0.268)GGMS(0.88)AS(0.764)S(0.213)EIIPADLPSK	MAS(-6.3)S(6.3)VT(-6.9)GGMS(15)AS(5.7)S(-5.7)EIIPADLPS(-56)K	4	3	3.88	5950	11910	11910	F3	51049	0.28521	0.35361	0.13219	0.22899	0.28	0.35	0.17	0.2	0.315	0.05	0.1587	0.185	0.02	0.1081	0.595	0.00690097	0.0372173	down
5928	XP_031612030.1	vitellogenin-2 [Oreochromis aureus]	3012	960	0.967183	15.0718	3.57459e-17	101.59	85.287	80.847	S	MASSVT(0.017)GGMS(0.967)AS(0.535)S(0.48)EIIPADLPSK	MAS(-41)S(-33)VT(-18)GGMS(15)AS(0.49)S(-0.49)EIIPADLPS(-45)K	10	3	-0.53514	5950	11904;11905;11906;11907;11908;11909;11910;11913	11904	F3	48496	1.02431	1.23614	0.32056	0.418996	1.01	1.22	0.4	0.36	1.115	0.15	0.1345	0.38	0.03	0.0789	0.344	0.000427405	0.00940266	down
5929	XP_031612030.1	vitellogenin-2 [Oreochromis aureus]	3012	962	0.870479	11.0885	2.18156e-12	87.052	75.43	75.868	S	MASSVT(0.001)GGMS(0.061)AS(0.87)S(0.068)EIIPADLPSK	MAS(-36)S(-36)VT(-30)GGMS(-12)AS(11)S(-11)EIIPADLPS(-43)K	12	3	-0.1526	5950	11904;11905;11906;11907;11908;11909;11910;11911;11912	11912	F5	45696	0.95807	1.12523	0.37942	0.520316	0.95	1.11	0.48	0.45	1.03	0.11	0.1068	0.465	0.02	0.0430	0.454	0.000508551	0.00977137	down
5930	XP_031612030.1	vitellogenin-2 [Oreochromis aureus]	3012	963	0.666144	0	3.60463e-08	69.779	53.882	69.779	S	MASSVT(0.001)GGMS(0.666)AS(0.666)S(0.666)EIIPADLPSK	MAS(-43)S(-39)VT(-28)GGMS(0)AS(0)S(0)EIIPADLPS(-45)K	13	3	-0.1588	5950	11908	11908	F4	48208	0.31549	0.3715	0.13654	0.17647	0.31	0.37	0.17	0.15	0.34	0.04	0.1176	0.16	0.01	0.0625	0.474	0.00124293	0.0162298	down
5932	XP_031612030.1	vitellogenin-2 [Oreochromis aureus]	3012	940	0.996097	24.2009	2.64712e-115	188.69	167.57	110.78	S	STPLISSETAS(0.004)QLS(0.996)K	S(-94)T(-89)PLIS(-54)S(-52)ET(-40)AS(-24)QLS(24)K	14	2	0.36829	9532;9533;9534	19570;19571;19572;19573	19570	F4	39766	1.05137	1.20951	0.316516	0.422612	1.04	1.2	0.4	0.36	1.12	0.11	0.0982	0.38	0.03	0.0789	0.341	0.000237533	0.0071763	down
5933	XP_031612030.1	vitellogenin-2 [Oreochromis aureus]	3012	943	0.987624	20.4105	1.71247e-09	84.68	71.643	84.68	S	STPLISSETAS(0.016)QLS(0.984)KAS(0.988)LNS(0.012)K	S(-55)T(-55)PLIS(-40)S(-40)ET(-39)AS(-19)QLS(19)KAS(20)LNS(-20)K	17	3	0.60792	9533;9534	19571;19572;19574	19572	F4	41903	0.70848	0.78602	0.209625	0.295862	0.7	0.78	0.26	0.25	0.74	0.06	0.0811	0.255	0.01	0.0392	0.345	6.42438e-05	0.00361764	down
5934	XP_031612030.1	vitellogenin-2 [Oreochromis aureus]	3012	946	0.721397	1.47064	0.00361438	47.175	33.159	47.175	S	S(0.001)T(0.001)PLIS(0.096)S(0.154)ET(0.19)AS(0.571)QLS(0.622)KAS(0.644)LNS(0.721)K	S(-28)T(-28)PLIS(-8.6)S(-3.5)ET(-6.8)AS(-0.51)QLS(1.5)KAS(0.51)LNS(1.5)K	20	4	2.8775	9533;9534	19571	19571	F3	45506	0.30381	0.31013	0.16353	0.22253	0.3	0.31	0.21	0.19	0.305	0.01	0.0328	0.2	0.01	0.0500	0.656	0.000798952	0.0129703	down
5935	XP_031612030.1	vitellogenin-2 [Oreochromis aureus]	3012	949	0.606214	1.863	0.00169702	42.319	30.577	42.319	S	S(0.002)T(0.002)PLIS(0.099)S(0.106)ET(0.306)AS(0.13)QLS(0.401)KAS(0.891)LNS(0.458)KIS(0.606)R	S(-25)T(-25)PLIS(-7.2)S(-6.9)ET(-1.1)AS(-5.6)QLS(1.1)KAS(8.8)LNS(-1.9)KIS(1.9)R	23	4	0.63545	9534	19574	19574	F4	43509	0.30621	0.42081	0.11665	0.15634	0.3	0.42	0.15	0.13	0.36	0.08	0.2222	0.14	0.01	0.0714	0.4	0.00302654	0.023841	down
5941	XP_031612039.1	vitellogenin 3, phosvitinless [Oreochromis aureus]	3015	1051	0.90037	9.56106	1.07937e-09	82.773	59.673	82.773	S	ET(0.1)RNS(0.9)QEIMMDATAPQPVVSIK	ET(-9.6)RNS(9.6)QEIMMDAT(-47)APQPVVS(-75)IK	5	3	-1.7313	2360	4653	4653	F4	37771	0.31586	0.35334	0.14478	0.18602	0.31	0.35	0.18	0.16	0.33	0.03	0.0909	0.17	0.01	0.0588	0.517	0.000872374	0.0137721	down
5951	XP_031612100.1	mitochondrial import receptor subunit TOM70 [Oreochromis aureus]	3021	60	0.995095	23.0964	4.77074e-08	110.83	92.696	101.85	S	KTPEGS(0.005)AS(0.995)PVQGQDGESR	KT(-46)PEGS(-23)AS(23)PVQGQDGES(-72)R	8	3	1.052	3552;5032	10203;10204;10206	10206	F3	21734	0.1817	0.19316	0.28301	0.35541	0.18	0.19	0.36	0.31	0.185	0.01	0.0541	0.335	0.04	0.1194	1.812	0.0010075	0.0154347	up
5952	XP_031612100.1	mitochondrial import receptor subunit TOM70 [Oreochromis aureus]	3021	69	0.999964	44.5934	3.87878e-09	86.039	67.723	86.039	S	KTPEGSASPVQGQDGES(1)R	KT(-77)PEGS(-60)AS(-45)PVQGQDGES(45)R	17	3	1.3105	3552;5032	10208	10208	F3	24106	0.15336	0.18333	0.23855	0.42476	0.15	0.18	0.3	0.37	0.165	0.02	0.1212	0.335	0.05	0.1493	2.048	0.00307727	0.0241911	up
5967	XP_031612181.1	tetratricopeptide repeat protein 31-like isoform X2 [Oreochromis aureus]	3026	76	0.999742	35.9135	0.000119515	87.641	59.064	87.641	S	NSSCPS(1)PLR	NS(-57)S(-36)CPS(36)PLR	6	2	-1.9602	6465	12926;12927	12927	F3	22566	0.1819	0.20434	0.21664	0.39712	0.18	0.2	0.27	0.34	0.19	0.01	0.0526	0.305	0.05	0.1639	1.61	0.00774042	0.0392524	up
5975	XP_031612226.1	caspase activity and apoptosis inhibitor 1 [Oreochromis aureus]	3030	18	0.662186	2.92302	0.0198744	43.512	16.543	43.512	S	KHS(0.338)QS(0.662)EER	KHS(-2.9)QS(2.9)EER	5	3	1.5695	4709	9516	9516	F2	9130	0.29196	0.32626	0.16752	0.21425	0.29	0.32	0.21	0.18	0.305	0.02	0.0656	0.195	0.02	0.1026	0.641	0.00342729	0.0256685	down
5983	XP_031612257.1	testis-expressed protein 2-like isoform X2 [Oreochromis aureus]	3031	181	0.803884	6.70805	1.65207e-63	167.14	138.16	167.14	S	S(0.003)LS(0.804)S(0.172)DT(0.021)SQDSSSSSASYR	S(-24)LS(6.7)S(-6.7)DT(-16)S(-38)QDS(-79)S(-90)S(-95)S(-100)S(-110)AS(-120)Y(-130)R	3	2	0.36125	8790	17932	17932	F2	29157	0.2059	0.15973	0.24372	0.39066	0.2	0.16	0.31	0.34	0.18	0.03	0.1667	0.325	0.02	0.0615	1.828	0.00336483	0.0256685	up
6046	XP_031612633.2	OTU domain-containing protein 4 [Oreochromis aureus]	3057	1214	0.76055	6.37087	0.0141272	54.898	37.572	54.898	S	GS(0.001)S(0.003)S(0.02)S(0.175)PGS(0.761)PS(0.036)QY(0.004)RPR	GS(-31)S(-24)S(-16)S(-6.4)PGS(6.4)PS(-13)QY(-23)RPR	8	2	0.42566	3514	7025	7025	F4	22814	0.20398	0.19803	0.27212	0.32587	0.2	0.2	0.34	0.28	0.2	0	0	0.31	0.04	0.1290	1.55	0.00449404	0.0304174	up
6048	XP_031612633.2	OTU domain-containing protein 4 [Oreochromis aureus]	3057	665	0.870398	8.27202	0.000123304	80.706	60.081	80.706	S	S(0.87)S(0.13)PPITSLLR	S(8.3)S(-8.3)PPIT(-46)S(-52)LLR	1	2	1.3008	9330	19155	19155	F5	44625	0.13904	0.11785	0.31614	0.42697	0.14	0.12	0.4	0.37	0.13	0.01	0.0769	0.385	0.02	0.0519	2.979	0.000210393	0.0069268	up
6094	XP_031612890.2	apoptotic chromatin condensation inducer in the nucleus [Oreochromis aureus]	3087	1177	0.812171	7.02202	0.00124267	52.866	38.394	52.866	S	S(0.812)S(0.161)PGT(0.019)S(0.004)S(0.004)AEGEQESGTVAGR	S(7)S(-7)PGT(-16)S(-24)S(-24)AEGEQES(-47)GT(-48)VAGR	1	2	0.087041	9311	19109	19109	F1	21210	0.20675	0.20025	0.24978	0.34322	0.2	0.2	0.31	0.3	0.2	0	0	0.305	0.01	0.0328	1.525	2.48754e-05	0.00172649	up
6095	XP_031612890.2	apoptotic chromatin condensation inducer in the nucleus [Oreochromis aureus]	3087	1178	0.811374	6.33632	1.24835e-79	176.42	141.11	176.42	S	S(0.189)S(0.811)PGTSSAEGEQESGTVAGR	S(-6.3)S(6.3)PGT(-52)S(-71)S(-83)AEGEQES(-150)GT(-150)VAGR	2	2	-0.45805	9311	19111	19111	F2	24076	0.21702	0.18263	0.25214	0.34822	0.21	0.18	0.32	0.3	0.195	0.02	0.1026	0.31	0.01	0.0323	1.599	0.00234857	0.022507	up
6150	XP_031613095.1	transcription elongation factor A protein 1 [Oreochromis aureus]	3111	109	0.999391	33.7595	4.92393e-61	158.31	137.46	158.31	S	EQSTPVVSPSQGS(0.999)PEAKEESSSSSNSSSK	EQS(-96)T(-90)PVVS(-66)PS(-47)QGS(34)PEAKEES(-34)S(-39)S(-46)S(-50)S(-56)NS(-63)S(-70)S(-76)K	13	4	1.6022	2220	4409	4409	F3	30483	0.19607	0.17708	0.28295	0.34389	0.19	0.18	0.36	0.3	0.185	0.01	0.0541	0.33	0.04	0.1212	1.785	0.00185639	0.0193526	up
6162	XP_039473928.1	serine/threonine-protein kinase TAO1 [Oreochromis aureus]	3120	9	1	94.5417	1.29994e-28	143.71	109.62	94.542	S	AGS(1)LKDPEVAELFFKEDPEK	AGS(95)LKDPEVAELFFKEDPEK	3	4	2.3567	393;394	837;838	838	F4	49766	0.36654	0.28743	0.14948	0.19655	0.36	0.28	0.19	0.17	0.32	0.06	0.1875	0.18	0.01	0.0556	0.572	0.00561825	0.0330153	down
6246	XP_031613879.1	cingulin-like protein 1 isoform X3 [Oreochromis aureus]	3184	386	0.582592	1.44817	3.15758e-10	119.65	94.328	119.65	S	S(0.583)RS(0.417)VDSALGLR	S(1.4)RS(-1.4)VDS(-47)ALGLR	1	3	-1.9006	9189	18832	18832	F4	35617	0.22581	0.18672	0.24551	0.34197	0.22	0.18	0.31	0.29	0.2	0.03	0.15	0.3	0.01	0.0333	1.515	0.00674462	0.0372173	up
6260	XP_031613889.2	E3 ubiquitin-protein ligase Arkadia isoform X2 [Oreochromis aureus]	3186	44	0.998911	29.6783	0.00750387	52.821	32.359	52.821	S	AGS(0.999)DFET(0.001)LCESR	AGS(30)DFET(-30)LCES(-49)R	3	2	-3.1756	388	828;829	828	F2	40510	0.34052	0.2834	0.15063	0.22544	0.34	0.28	0.19	0.19	0.31	0.04	0.129	0.19	0	0	0.619	0.00327351	0.0253985	down
6278	XP_039466727.1	SAFB-like transcription modulator isoform X2 [Oreochromis aureus]	3192	854	1	50.8431	0.0198604	50.843	21.515	50.843	S	ERS(1)FNDRDER	ERS(51)FNDRDER	3	3	-0.99402	2252	4469	4469	F1	16478	0.15995	0.18519	0.29486	0.35999	0.16	0.18	0.37	0.31	0.17	0.01	0.0588	0.34	0.04	0.1176	2.007	0.00149985	0.017007	up
6289	XP_039454652.1	serine/arginine-rich splicing factor 11 isoform X5 [Oreochromis aureus]	3199	84	1	105.277	6.83235e-05	105.28	85.181	105.28	S	LNLAAGLNLS(1)PGLK	LNLAAGLNLS(110)PGLK	10	3	-0.63913	5585	11226;11227	11227	F6	48377	0.32113	0.33565	0.15561	0.18761	0.32	0.33	0.2	0.16	0.325	0.01	0.0308	0.18	0.03	0.1667	0.554	0.00272597	0.0230964	down
6302	XP_031614070.1	ribosomal protein S6 kinase alpha-1 isoform X5 [Oreochromis aureus]	3206	333	0.773171	5.32613	4.53817e-07	79.69	66.46	79.69	S	T(0.227)PKDS(0.773)PGVPPSAGAHQLFR	T(-5.3)PKDS(5.3)PGVPPS(-46)AGAHQLFR	5	4	1.062	10222	21088;21089	21088	F5	31756	0.18434	0.14442	0.29789	0.37334	0.18	0.14	0.37	0.32	0.16	0.03	0.1875	0.345	0.04	0.1159	2.191	0.00268437	0.0230964	up
6361	XP_039475475.1	glucocorticoid-induced transcript 1 protein isoform X3 [Oreochromis aureus]	3239	99	0.997314	25.7226	0.00013719	109.6	90.357	109.6	S	ESSCPPDS(0.997)PVS(0.003)R	ES(-70)S(-48)CPPDS(26)PVS(-26)R	8	2	0.056674	2305	4560	4560	F2	21767	0.19656	0.20981	0.22509	0.36854	0.19	0.21	0.28	0.32	0.2	0.01	0.05	0.3	0.03	0.1000	1.504	0.00354841	0.0256685	up
6379	XP_031614552.1	BRISC and BRCA1-A complex member 1 [Oreochromis aureus]	3250	24	0.987093	18.8353	7.27125e-06	112.15	64.31	104.45	S	T(0.013)RS(0.987)NPEGAEDR	T(-19)RS(19)NPEGAEDR	3	3	-0.7413	10317;10318	21254;21255;21256;21257	21254	F1	13076	0.34695	0.28321	0.12873	0.23736	0.34	0.28	0.16	0.2	0.31	0.04	0.129	0.18	0.03	0.1667	0.586	0.00770921	0.0391862	down
6416	XP_031614753.1	DIS3-like exonuclease 2 isoform X2 [Oreochromis aureus]	3273	104	0.999999	60.301	5.70608e-41	151.82	127.27	139.75	S	DTATSHDGDVES(1)GEELGSSK	DT(-77)AT(-67)S(-60)HDGDVES(60)GEELGS(-77)S(-81)K	12	3	2.8418	1592;7191	3212;3213;3214;14533	3212	F2	30489	0.18734	0.2167	0.25357	0.33612	0.19	0.21	0.32	0.29	0.2	0.01	0.05	0.305	0.02	0.0656	1.529	0.00188559	0.0194977	up
6419	XP_039458457.1	WW domain-containing adapter protein with coiled-coil-like isoform X3 [Oreochromis aureus]	3274	64	0.99857	29.8658	0.0346531	51.872	37.203	51.872	S	SDES(0.999)PVS(0.001)R	S(-34)DES(30)PVS(-30)R	4	2	1.6911	8090	16537	16537	F1	14124	0.19445	0.21532	0.2299	0.36032	0.19	0.21	0.29	0.31	0.2	0.01	0.05	0.3	0.01	0.0333	1.504	0.00134686	0.0167301	up
6451	XP_039460564.1	OTU domain-containing protein 5-A isoform X2 [Oreochromis aureus]	3294	548	0.986821	18.7443	0.00034455	91.065	81.427	91.065	S	EREPSPDS(0.013)S(0.987)	EREPS(-57)PDS(-19)S(19)	9	2	-1.4471	2231	4432	4432	F1	14362	0.3875	0.30329	0.15394	0.15527	0.38	0.3	0.19	0.13	0.34	0.06	0.1765	0.16	0.04	0.2500	0.477	0.0095912	0.0456396	down
6461	XP_031615045.1	methyl-CpG-binding protein 2 isoform X1 [Oreochromis aureus]	3299	6	1	58.8772	2.14498e-10	58.877	49.25	58.877	S	AAVES(1)GEERLEEGQEGDEGPIEPQPPRK	AAVES(59)GEERLEEGQEGDEGPIEPQPPRK	5	4	0.71738	134	260	260	F2	43134	0.33491	0.27845	0.15732	0.22932	0.33	0.28	0.2	0.2	0.305	0.04	0.1311	0.2	0	0	0.66	0.00304264	0.0239433	down
6472	XP_039478622.1	tubulin-specific chaperone cofactor E-like protein isoform X3 [Oreochromis aureus]	3305	46	0.999993	51.5787	3.00718e-12	107.88	93.417	107.88	S	GPGMGVVVVSTGGPQGS(1)PMKDR	GPGMGVVVVS(-66)T(-52)GGPQGS(52)PMKDR	17	4	0.33718	3325;7259	6594;6595;6596;14699;14700;14701;14702	6596	F5	36512	0.18842	0.18234	0.23544	0.38668	0.19	0.18	0.3	0.33	0.185	0.01	0.0541	0.315	0.02	0.0635	1.704	0.000457002	0.00940266	up
6532	XP_039473115.1	aspartyl/asparaginyl beta-hydroxylase isoform X5 [Oreochromis aureus]	3327	455	0.988144	19.2088	0.000679846	69.92	54.419	66.246	S	EGLES(0.988)GEPGT(0.012)DDGR	EGLES(19)GEPGT(-19)DDGR	5	2	-0.81728	1949	3914;3915;3916;3917	3915	F1	25596	0.29864	0.37022	0.13122	0.20422	0.3	0.37	0.17	0.18	0.335	0.05	0.1493	0.175	0.01	0.0571	0.528	0.00199814	0.020362	down
6533	XP_039473115.1	aspartyl/asparaginyl beta-hydroxylase isoform X5 [Oreochromis aureus]	3327	445	0.999796	36.9063	0.00299792	58.37	38.041	58.37	S	IAES(1)IPYLK	IAES(37)IPY(-37)LK	4	3	-0.77145	4072	8175	8175	F4	48765	0.30998	0.4669	0.07955	0.14356	0.31	0.46	0.1	0.12	0.385	0.11	0.2857	0.11	0.01	0.0909	0.297	0.00223531	0.0222204	down
6534	XP_039473115.1	aspartyl/asparaginyl beta-hydroxylase isoform X5 [Oreochromis aureus]	3327	252	0.970706	15.2201	3.2022e-09	116.39	80.953	116.39	S	QTEAEGT(0.029)S(0.971)EKQAEDK	QT(-39)EAEGT(-15)S(15)EKQAEDK	8	3	0.64859	7018;7019;7020	14149;14150;14152;14153;14154;14155;14157;14159	14155	F2	24727	0.37775	0.2823	0.15456	0.17392	0.37	0.28	0.19	0.15	0.325	0.06	0.1846	0.17	0.03	0.1765	0.534	0.00886982	0.0433861	down
6535	XP_039473115.1	aspartyl/asparaginyl beta-hydroxylase isoform X5 [Oreochromis aureus]	3327	480	0.993697	21.9914	9.86333e-06	94.856	77.487	74.519	S	VGDNS(0.994)AY(0.006)DWYELGHK	VGDNS(22)AY(-22)DWY(-47)ELGHK	5	4	-1.2553	10781	22226;22227	22227	F4	46420	0.32419	0.44929	0.080168	0.14635	0.32	0.44	0.1	0.13	0.38	0.08	0.2105	0.115	0.02	0.1739	0.31	0.00212761	0.0214543	down
6609	XP_031615832.1	spectrin family protein isoform X2 [Oreochromis aureus]	3368	2206	0.999972	45.4863	0.0102503	52.693	15.999	52.693	S	KGS(1)IGFYK	KGS(45)IGFY(-45)K	3	3	0.58768	4672	9453	9453	F4	35714	0.34589	0.28984	0.14482	0.21944	0.34	0.29	0.18	0.19	0.315	0.04	0.127	0.185	0.01	0.0541	0.591	0.00165604	0.018029	down
6674	XP_031616191.1	E3 ubiquitin-protein ligase TRIM36 isoform X2 [Oreochromis aureus]	3397	102	0.990717	20.2824	0.0267214	45.158	30.22	45.158	S	RGS(0.991)VT(0.009)PR	RGS(20)VT(-20)PR	3	3	2.913	7314	14857	14857	F2	12316	0.11967	0.20257	0.27473	0.40304	0.12	0.2	0.35	0.35	0.16	0.06	0.375	0.35	0	0	2.333	0.011676	0.0486024	up
6675	XP_031616191.1	E3 ubiquitin-protein ligase TRIM36 isoform X2 [Oreochromis aureus]	3397	92	0.926929	12.0835	0.0059181	59.418	45.183	59.418	S	S(0.057)GS(0.927)IS(0.013)S(0.003)PGWR	S(-12)GS(12)IS(-19)S(-25)PGWR	3	2	0.4664	8425	17213	17213	F4	33057	0.18201	0.1828	0.24011	0.39508	0.18	0.18	0.3	0.34	0.18	0	0	0.32	0.03	0.0938	1.778	0.000541899	0.0100355	up
6676	XP_031616192.1	solute carrier family 1 member 3a [Oreochromis aureus]	3398	503	0.999991	50.4688	1.26012e-11	105.72	84.182	105.72	S	HELQNTDPEVGNS(1)VVEEAEK	HELQNT(-50)DPEVGNS(50)VVEEAEK	13	5	0.79022	3747	7459;7460	7460	F2	39742	0.15884	0.20367	0.28021	0.35728	0.16	0.2	0.35	0.31	0.18	0.03	0.1667	0.33	0.03	0.0909	1.857	0.0036379	0.0260953	up
6699	XP_031616255.1	2-oxoisovalerate dehydrogenase subunit alpha, mitochondrial [Oreochromis aureus]	3409	348	1	68.7841	1.30227e-15	101.39	78.857	101.39	S	S(1)VDEVNYWDK	S(69)VDEVNY(-69)WDK	1	3	2.0181	4188;4189;9615;9616	8412;8413;19715;19716	19715	F3	45219	0.41372	0.38643	0.50443	0.69542	0.41	0.38	0.63	0.6	0.395	0.02	0.0506	0.615	0.02	0.0325	1.559	0.000446252	0.00940266	up
6722	XP_039454606.1	CAD protein [Oreochromis aureus]	3426	1413	0.978302	16.5407	0.00105139	83.397	44.375	80.979	S	RLS(0.978)S(0.022)FVTK	RLS(17)S(-17)FVT(-62)K	3	3	-0.10429	7479	15186;15187;15188;15189;15190;15191;15192	15186	F2	41154	0.33317	0.3944	0.12649	0.17278	0.33	0.39	0.16	0.15	0.36	0.04	0.1111	0.155	0.01	0.0645	0.434	0.000508671	0.00977137	down
6753	XP_039454864.1	apoptotic chromatin condensation inducer in the nucleus-like isoform X1 [Oreochromis aureus]	3434	401	0.97371	18.4631	0.00387509	55.04	31.969	43.184	S	RPGS(0.974)FS(0.011)S(0.014)S(0.001)PAK	RPGS(18)FS(-19)S(-18)S(-30)PAK	4	3	2.5031	4931;7566	9978;15390;15391	15390	F4	25487	0.21998	0.18605	0.23598	0.35501	0.22	0.18	0.3	0.31	0.2	0.03	0.15	0.305	0.01	0.0328	1.54	0.00535383	0.0322031	up
6757	XP_039454959.1	protein enabled homolog isoform X4 [Oreochromis aureus]	3436	420	0.752603	4.83172	0.0259532	48.602	29.822	48.602	S	GS(0.247)S(0.753)PEPDQR	GS(-4.8)S(4.8)PEPDQR	3	2	-0.70795	3506	7008	7008	F1	12069	0.27214	0.3525	0.14854	0.22682	0.27	0.35	0.19	0.2	0.31	0.06	0.1935	0.195	0.01	0.0513	0.64	0.00948245	0.0452339	down
6782	XP_039455150.1	transport and Golgi organization protein 1 homolog isoform X2 [Oreochromis aureus]	3445	1777	1	57.8017	0.000627005	77.593	60.157	57.802	S	RPPS(1)APVAR	RPPS(58)APVAR	4	3	-0.51899	7590	15435;15436;15437;15438;15439	15439	F5	19386	0.19892	0.19632	0.24162	0.38582	0.2	0.19	0.3	0.33	0.195	0.01	0.0513	0.315	0.02	0.0635	1.616	0.000604494	0.0109369	up
6789	XP_039455511.1	cordon-bleu protein-like 1b isoform X5 [Oreochromis aureus]	3450	863	0.999758	36.575	1.26588e-26	121.75	107.27	82.992	S	ANLPPPPLPPPVQCDVETTGATNIQLS(1)PK	ANLPPPPLPPPVQCDVET(-52)T(-48)GAT(-37)NIQLS(37)PK	27	4	0.38256	657	1462;1463;1464	1464	F6	46018	0.13564	0.18392	0.27171	0.40873	0.13	0.18	0.34	0.35	0.155	0.04	0.2581	0.345	0.01	0.0290	2.285	0.00328031	0.0253985	up
6789	XP_039455507.1	cordon-bleu protein-like 1b isoform X2 [Oreochromis aureus]	3451	883	0.999758	36.575	1.26588e-26	121.75	107.27	82.992	S	ANLPPPPLPPPVQCDVETTGATNIQLS(1)PK	ANLPPPPLPPPVQCDVET(-52)T(-48)GAT(-37)NIQLS(37)PK	27	4	0.38256	657	1462;1463;1464	1464	F6	46018	0.13564	0.18392	0.27171	0.40873	0.13	0.18	0.34	0.35	0.155	0.04	0.2581	0.345	0.01	0.0290	2.285	0.00328031	0.0253985	up
6803	XP_039455511.1	cordon-bleu protein-like 1b isoform X5 [Oreochromis aureus]	3450	801	0.795063	5.88781	0.0113389	41.092	19.219	41.092	S	PAS(0.205)FRFS(0.795)QHK	PAS(-5.9)FRFS(5.9)QHK	7	4	-1.3332	6553	13103	13103	F6	32399	0.36275	0.35437	0.10983	0.17306	0.36	0.35	0.14	0.15	0.355	0.01	0.0282	0.145	0.01	0.0690	0.409	3.13749e-05	0.00204841	down
6803	XP_039455507.1	cordon-bleu protein-like 1b isoform X2 [Oreochromis aureus]	3451	821	0.795063	5.88781	0.0113389	41.092	19.219	41.092	S	PAS(0.205)FRFS(0.795)QHK	PAS(-5.9)FRFS(5.9)QHK	7	4	-1.3332	6553	13103	13103	F6	32399	0.36275	0.35437	0.10983	0.17306	0.36	0.35	0.14	0.15	0.355	0.01	0.0282	0.145	0.01	0.0690	0.409	3.13749e-05	0.00204841	down
6804	XP_039455511.1	cordon-bleu protein-like 1b isoform X5 [Oreochromis aureus]	3450	936	0.999987	48.4221	7.74276e-34	115.76	98.963	102.39	S	PKPPLS(1)PVLPPVS(0.879)PT(0.121)PS(0.001)LSSVTESK	PKPPLS(48)PVLPPVS(8.6)PT(-8.6)PS(-32)LS(-53)S(-60)VT(-66)ES(-72)K	6	4	-0.1236	6566;8505	13133;13136;13137;13138;17363;17364;17365;17366;17367;17370;17373	13137	F5	45219	0.64812	0.63129	0.28899	0.44263	0.64	0.62	0.36	0.38	0.63	0.01	0.0159	0.37	0.01	0.0270	0.588	8.91736e-05	0.00456002	down
6804	XP_039455507.1	cordon-bleu protein-like 1b isoform X2 [Oreochromis aureus]	3451	956	0.999987	48.4221	7.74276e-34	115.76	98.963	102.39	S	PKPPLS(1)PVLPPVS(0.879)PT(0.121)PS(0.001)LSSVTESK	PKPPLS(48)PVLPPVS(8.6)PT(-8.6)PS(-32)LS(-53)S(-60)VT(-66)ES(-72)K	6	4	-0.1236	6566;8505	13133;13136;13137;13138;17363;17364;17365;17366;17367;17370;17373	13137	F5	45219	0.64812	0.63129	0.28899	0.44263	0.64	0.62	0.36	0.38	0.63	0.01	0.0159	0.37	0.01	0.0270	0.588	8.91736e-05	0.00456002	down
6814	XP_039455511.1	cordon-bleu protein-like 1b isoform X5 [Oreochromis aureus]	3450	774	0.98456	20.5672	2.66352e-20	134.08	109.23	52.522	S	VS(0.003)S(0.003)S(0.009)VGAS(0.985)PAGS(1)PAEVK	VS(-25)S(-25)S(-21)VGAS(21)PAGS(43)PAEVK	8	3	1.0963	11160	22978;22979;22981	22978	F2	35196	0.37878	0.4322	0.45964	0.72939	0.37	0.43	0.58	0.63	0.4	0.04	0.1	0.605	0.04	0.0661	1.521	0.00354775	0.0256685	up
6814	XP_039455507.1	cordon-bleu protein-like 1b isoform X2 [Oreochromis aureus]	3451	794	0.98456	20.5672	2.66352e-20	134.08	109.23	52.522	S	VS(0.003)S(0.003)S(0.009)VGAS(0.985)PAGS(1)PAEVK	VS(-25)S(-25)S(-21)VGAS(21)PAGS(43)PAEVK	8	3	1.0963	11160	22978;22979;22981	22978	F2	35196	0.37878	0.4322	0.45964	0.72939	0.37	0.43	0.58	0.63	0.4	0.04	0.1	0.605	0.04	0.0661	1.521	0.00354775	0.0256685	up
6914	XP_039456939.1	plasma membrane calcium-transporting ATPase 1a isoform X2 [Oreochromis aureus]	3483	1190	1	91.9524	1.70611e-35	142.94	119.2	142.94	S	IEDS(1)EPHIPLIDDTDAEDDAPTK	IEDS(92)EPHIPLIDDT(-92)DAEDDAPT(-140)K	4	4	0.2416	4133;4134	8297;8298;8299;8300;8301;8302;8303	8297	F3	50230	0.17615	0.19045	0.24799	0.3775	0.17	0.19	0.31	0.32	0.18	0.01	0.0556	0.315	0.01	0.0317	1.756	0.000457238	0.00940266	up
6923	XP_039456969.1	SH3 and multiple ankyrin repeat domains protein 3 isoform X2 [Oreochromis aureus]	3484	1528	0.849618	7.52027	2.1606e-20	136.26	106.77	136.26	S	LFS(0.15)S(0.85)LGELHTISQR	LFS(-7.5)S(7.5)LGELHT(-80)IS(-100)QR	4	3	-1.8755	5296	10675	10675	F6	46574	0.21651	0.17652	0.23839	0.36858	0.21	0.17	0.3	0.32	0.19	0.03	0.1579	0.31	0.01	0.0323	1.65	0.00444101	0.0301441	up
6923	XP_039470876.1	SH3 and multiple ankyrin repeat domains protein 3 [Oreochromis aureus]	3797	1790	0.849618	7.52027	2.1606e-20	136.26	106.77	136.26	S	LFS(0.15)S(0.85)LGELHTISQR	LFS(-7.5)S(7.5)LGELHT(-80)IS(-100)QR	4	3	-1.8755	5296	10675	10675	F6	46574	0.21651	0.17652	0.23839	0.36858	0.21	0.17	0.3	0.32	0.19	0.03	0.1579	0.31	0.01	0.0323	1.65	0.00444101	0.0301441	up
6946	XP_039457371.1	sodium-coupled neutral amino acid transporter 4 isoform X2 [Oreochromis aureus]	3496	14	0.999997	55.8598	6.418e-83	177.73	151.41	90.518	S	KVS(1)T(1)VADDDS(1)LDEQLTEPTDCEK	KVS(56)T(56)VADDDS(34)LDEQLT(-34)EPT(-51)DCEK	3	4	-0.1135	5089;11167	10306;10318;10321;10323;10324;10325	10324	F2	43625	0.92945	0.90224	0.44677	0.72153	0.92	0.89	0.56	0.62	0.905	0.02	0.0221	0.59	0.04	0.0678	0.652	0.000814261	0.0129703	down
6946	XP_039457372.1	sodium-coupled neutral amino acid transporter 4 isoform X3 [Oreochromis aureus]	3497	14	0.999997	55.8598	6.418e-83	177.73	151.41	90.518	S	KVS(1)T(1)VADDDS(1)LDEQLTEPTDCEK	KVS(56)T(56)VADDDS(34)LDEQLT(-34)EPT(-51)DCEK	3	4	-0.1135	5089;11167	10306;10318;10321;10323;10324;10325	10324	F2	43625	0.92945	0.90224	0.44677	0.72153	0.92	0.89	0.56	0.62	0.905	0.02	0.0221	0.59	0.04	0.0678	0.652	0.000814261	0.0129703	down
6975	XP_039458026.1	protein odr-4 homolog isoform X2 [Oreochromis aureus]	3512	304	0.922787	11.3415	6.76536e-08	69.356	48.542	69.356	S	VSGPLCVCDY(0.068)QFS(0.923)DEDLS(0.009)EVPER	VS(-44)GPLCVCDY(-11)QFS(11)DEDLS(-20)EVPER	13	3	2.582	11122	22895;22896	22895	F4	50753	0.31611	0.36786	0.12056	0.19547	0.31	0.36	0.15	0.17	0.335	0.04	0.1194	0.16	0.01	0.0625	0.48	0.000943333	0.0148013	down
7069	XP_039460024.1	dnaJ homolog subfamily C member 5 [Oreochromis aureus]	3565	10	0.661314	7.0087	7.72276e-12	125.73	99.055	125.73	S	T(0.103)LS(0.661)T(0.103)S(0.132)GES(0.001)LYAVLGVNK	T(-8.1)LS(7)T(-8.1)S(-7)GES(-29)LY(-82)AVLGVNK	3	3	2.6043	10145	20876	20876	F6	48477	0.17074	0.22142	0.23474	0.37311	0.17	0.22	0.3	0.32	0.195	0.04	0.2051	0.31	0.01	0.0323	1.617	0.00863885	0.0425708	up
7109	XP_039460866.1	rh50-like protein isoform X2 [Oreochromis aureus]	3584	401	0.941954	12.095	0.00032978	101.53	86.378	101.53	S	LKHS(0.942)NT(0.059)NS(0.998)VEDS(0.001)TV	LKHS(12)NT(-12)NS(29)VEDS(-29)T(-49)V	4	3	0.020539	3979;5462	10993;10994;10995;10996	10994	F2	33021	0.31869	0.42499	0.45497	0.80135	0.32	0.42	0.57	0.69	0.37	0.07	0.1892	0.63	0.08	0.1270	1.734	0.0112733	0.047895	up
7110	XP_039460866.1	rh50-like protein isoform X2 [Oreochromis aureus]	3584	405	0.997758	29.3227	1.02862e-08	120.55	92.224	101.53	S	LKHS(0.942)NT(0.059)NS(0.998)VEDS(0.001)TV	LKHS(12)NT(-12)NS(29)VEDS(-29)T(-49)V	8	3	0.020539	3979;5462	7971;10993;10994;10995;10997	10994	F2	33021	0.50014	0.59115	0.68828	1.22043	0.5	0.58	0.87	1.05	0.54	0.06	0.1111	0.96	0.13	0.1354	1.788	0.0036701	0.0262529	up
7130	XP_039461500.1	F-actin-uncapping protein LRRC16A isoform X3 [Oreochromis aureus]	3593	1053	0.999673	34.851	0.0305231	41.54	23.809	41.54	S	LS(1)FKIPSGK	LS(35)FKIPS(-35)GK	2	3	0.030826	5726	11465	11465	F6	39858	0.32974	0.29929	0.15414	0.21683	0.33	0.3	0.19	0.19	0.315	0.02	0.0635	0.19	0	0	0.605	0.000343527	0.00922137	down
7138	XP_039461979.1	epiplakin [Oreochromis aureus]	3600	1882	0.998113	27.2333	2.17902e-59	170.66	110.5	170.66	S	DVS(0.998)VT(0.002)ELLESK	DVS(27)VT(-27)ELLES(-160)K	3	3	0.94419	1669;4596	3344;3345;9271	3344	F3	51443	0.18605	0.21418	0.26252	0.32628	0.18	0.21	0.33	0.28	0.195	0.02	0.1026	0.305	0.04	0.1311	1.573	0.00631871	0.0356625	up
7198	XP_039462830.1	ras-associated and pleckstrin homology domains-containing protein 1b isoform X1 [Oreochromis aureus]	3619	270	0.859276	9.98488	1.87734e-31	143.25	127.55	143.25	S	QGS(0.859)PT(0.054)S(0.086)QGQNQTNTEHVTLR	QGS(10)PT(-12)S(-10)QGQNQT(-94)NT(-100)EHVT(-130)LR	3	3	0.032345	6737	13496	13496	F3	26493	0.16902	0.19848	0.24916	0.38334	0.17	0.2	0.31	0.33	0.185	0.02	0.1081	0.32	0.01	0.0312	1.741	0.00162758	0.0178362	up
7227	XP_039463858.1	uncharacterized protein LOC120437390 [Oreochromis aureus]	3636	43	0.978999	17.3942	0.000370698	78.809	29.509	78.809	S	S(0.018)QS(0.979)PVS(0.002)S(0.001)CTSVR	S(-17)QS(17)PVS(-26)S(-32)CT(-39)S(-47)VR	3	2	0.4386	9095	18622	18622	F3	22142	0.14254	0.17137	0.31808	0.36802	0.14	0.17	0.4	0.32	0.155	0.02	0.129	0.36	0.06	0.1667	2.345	0.00222602	0.0221566	up
7234	XP_039464427.1	protein NLRC3-like isoform X2 [Oreochromis aureus]	3643	37	0.942139	14.9103	0.00941975	51.092	24.419	51.092	S	S(0.03)QS(0.942)PVS(0.017)S(0.01)CVS(0.001)MR	S(-15)QS(15)PVS(-18)S(-20)CVS(-29)MR	3	2	-1.295	9096	18623	18623	F3	23367	0.18462	0.21013	0.27317	0.33208	0.18	0.21	0.34	0.29	0.195	0.02	0.1026	0.315	0.04	0.1270	1.625	0.00491772	0.0322031	up
7245	XP_039464831.1	interleukin-1 receptor accessory protein-like isoform X2 [Oreochromis aureus]	3651	432	0.645312	7.37045	0.0070534	55.461	30.324	55.461	S	S(0.645)S(0.118)S(0.118)S(0.118)EALK	S(7.4)S(-7.4)S(-7.4)S(-7.4)EALK	1	3	3.8049	9439	19401	19401	F2	25255	0.19822	0.1876	0.28364	0.33054	0.2	0.19	0.36	0.28	0.195	0.01	0.0513	0.32	0.06	0.1875	1.642	0.00711448	0.0372857	up
7254	XP_039465391.1	DENN domain-containing protein 4C [Oreochromis aureus]	3664	741	0.821591	8.8625	6.47827e-28	143.42	105.07	143.42	S	AAGAS(0.001)LS(0.071)S(0.822)S(0.107)PALLAK	AAGAS(-31)LS(-11)S(8.9)S(-8.9)PALLAK	8	2	4.2008	38	82;83	83	F4	41578	0.19872	0.19191	0.24639	0.35369	0.2	0.19	0.31	0.3	0.195	0.01	0.0513	0.305	0.01	0.0328	1.565	0.00013396	0.00545972	up
7271	XP_039465984.1	uncharacterized protein LOC116316856 [Oreochromis aureus]	3670	347	1	56.1471	0.00885746	56.147	46.742	56.147	S	EEPKEEPMEDEDS(1)QQ	EEPKEEPMEDEDS(56)QQ	13	3	2.1262	1876	3762	3762	F1	22587	0.16452	0.17306	0.23786	0.42456	0.16	0.17	0.3	0.37	0.165	0.01	0.0606	0.335	0.05	0.1493	2.032	0.00153684	0.0173587	up
7334	XP_039466497.1	F-actin-monooxygenase MICAL2 isoform X6 [Oreochromis aureus]	3683	811	0.968759	14.9548	0.00423619	53.754	32.503	53.754	S	T(0.031)FS(0.969)LPSVRPNR	T(-15)FS(15)LPS(-35)VRPNR	3	3	-1.8892	9945	20489	20489	F6	38388	0.17631	0.22346	0.22882	0.37142	0.17	0.22	0.29	0.32	0.195	0.04	0.2051	0.305	0.02	0.0656	1.59	0.0106779	0.047895	up
7335	XP_039466565.1	amine sulfotransferase-like [Oreochromis aureus]	3684	234	1	100.427	1.13399e-09	118.76	95.335	118.76	S	ANYEHLS(1)PER	ANY(-100)EHLS(100)PER	7	2	0.56161	683	1508;1509;1510;1511	1509	F2	29323	0.20124	0.18596	0.27161	0.34574	0.2	0.18	0.34	0.3	0.19	0.01	0.0526	0.32	0.03	0.0938	1.689	0.00159815	0.0175637	up
7384	XP_039467022.1	chromobox protein homolog 1a [Oreochromis aureus]	3703	23	0.693126	3.64955	9.81233e-06	82.663	70.243	82.663	S	KAAS(0.008)ET(0.299)S(0.693)GDGEER	KAAS(-20)ET(-3.6)S(3.6)GDGEER	7	3	0.97858	4506	9074	9074	F1	16789	0.35052	0.32569	0.13949	0.1843	0.35	0.32	0.18	0.16	0.335	0.02	0.0597	0.17	0.01	0.0588	0.508	0.000535498	0.00997324	down
7389	XP_039467085.1	putative oxidoreductase GLYR1 isoform X2 [Oreochromis aureus]	3706	140	0.970395	15.1652	1.65395e-67	160.6	146.3	160.6	S	ILDEDDEDLSALKDPS(0.03)EKDLADS(0.97)DPEPSTVER	ILDEDDEDLS(-47)ALKDPS(-15)EKDLADS(15)DPEPS(-44)T(-50)VER	23	5	-0.17862	4261	8559	8559	F3	49754	0.18675	0.18582	0.24916	0.37827	0.18	0.18	0.31	0.33	0.18	0	0	0.32	0.01	0.0312	1.778	6.7898e-05	0.00376321	up
7394	XP_039467198.1	SRC kinase signaling inhibitor 1 [Oreochromis aureus]	3712	526	0.923741	11.3639	7.13334e-09	120.08	92.428	120.08	S	KDS(0.924)AS(0.067)S(0.003)S(0.006)VFVESPK	KDS(11)AS(-11)S(-25)S(-22)VFVES(-64)PK	3	3	1.9373	1542;4580	9249	9249	F4	34442	0.19798	0.20431	0.21649	0.38122	0.2	0.2	0.27	0.33	0.2	0	0	0.3	0.04	0.1333	1.5	0.00620721	0.0353439	up
7408	XP_039467210.1	protein kinase, cAMP-dependent, catalytic, alpha, genome duplicate a isoform X2 [Oreochromis aureus]	3715	27	1	69.9224	0.00017567	69.922	55.959	69.922	S	S(1)ADAAAPEVPIVLPDVK	S(70)ADAAAPEVPIVLPDVK	1	3	0.027097	7915	16163	16163	F4	51001	0.30065	0.37392	0.13658	0.18885	0.3	0.37	0.17	0.16	0.335	0.05	0.1493	0.165	0.01	0.0606	0.498	0.0015628	0.0173985	down
7414	XP_039467264.1	ATP-citrate synthase [Oreochromis aureus]	3717	465	0.61793	2.08797	0.00255356	58.676	29.933	43.628	S	GKVES(0.618)S(0.382)PAK	GKVES(2.1)S(-2.1)PAK	5	3	3.8794	3190;10730;10731	6310;6311;6312;22131	6310	F3	19116	0.19202	0.15004	0.28183	0.42677	0.19	0.15	0.35	0.37	0.17	0.03	0.1765	0.36	0.01	0.0278	2.147	0.00170247	0.018447	up
7415	XP_039467264.1	ATP-citrate synthase [Oreochromis aureus]	3717	466	0.969931	15.0861	0.0006375	116.73	23.262	116.73	S	VES(0.03)S(0.97)PAK	VES(-15)S(15)PAK	4	2	1.4477	3190;10730;10731	6311;6312;22129;22130;22131	22130	F2	23139	0.19596	0.15882	0.2487	0.3496	0.19	0.16	0.31	0.3	0.175	0.02	0.1143	0.305	0.01	0.0328	1.756	0.00157874	0.0175254	up
7417	XP_039467264.1	ATP-citrate synthase [Oreochromis aureus]	3717	455	0.999324	31.9383	4.28349e-10	128.27	95.949	128.27	S	T(0.001)AS(0.999)FSENK	T(-32)AS(32)FS(-44)ENK	3	2	2.2168	9791;9792	20081;20082;20084;20085;20086;20087;20088;20089;20091;20095;20096;20097;20098;20099;20100;20102;20104;20105;20106;20107;20108	20091	F3	30104	0.18181	0.20423	0.27533	0.31847	0.18	0.2	0.35	0.27	0.19	0.01	0.0526	0.31	0.06	0.1935	1.636	0.00940189	0.044961	up
7434	XP_039468050.1	IQ motif and SEC7 domain-containing protein 1 isoform X7 [Oreochromis aureus]	3728	553	0.98265	17.5311	3.61851e-26	147.63	89.037	147.63	S	SISNQQS(0.017)S(0.983)PK	S(-100)IS(-68)NQQS(-18)S(18)PK	8	2	2.346	8574	17516	17516	F3	21559	0.20016	0.18017	0.26399	0.35567	0.2	0.18	0.33	0.31	0.19	0.01	0.0526	0.32	0.01	0.0312	1.689	0.000671851	0.0119813	up
7441	XP_039468096.1	182 kDa tankyrase-1-binding protein [Oreochromis aureus]	3730	1502	0.584894	2.23411	1.52737e-35	142.47	117.64	142.47	S	ASEEKEHQDEEVAPS(0.05)S(0.015)VELS(0.35)RS(0.585)PR	AS(-130)EEKEHQDEEVAPS(-11)S(-16)VELS(-2.2)RS(2.2)PR	22	4	2.1308	799	1762	1762	F2	35016	0.20235	0.18684	0.23102	0.37979	0.2	0.18	0.29	0.33	0.19	0.01	0.0526	0.31	0.03	0.0968	1.636	0.0020297	0.0205747	up
7450	XP_039468128.1	pleckstrin homology domain-containing family A member 6 [Oreochromis aureus]	3731	927	1	131.397	1.96697e-14	131.4	114.07	131.4	S	GQGQES(1)PQEEIAR	GQGQES(130)PQEEIAR	6	3	-0.75379	3367	6677;6678;6679	6679	F1	23968	0.16137	0.19878	0.23039	0.36677	0.16	0.2	0.29	0.32	0.18	0.03	0.1667	0.305	0.02	0.0656	1.716	0.0047951	0.0319011	up
7474	XP_039468666.1	plakophilin-1 [Oreochromis aureus]	3743	561	0.994786	22.8055	2.68824e-63	165.16	138.13	165.16	S	S(0.005)NS(0.995)QDNISPIGCFSTR	S(-23)NS(23)QDNIS(-78)PIGCFS(-130)T(-130)R	3	2	-0.84242	8888	18239;18240	18239	F4	43204	0.1947	0.17983	0.24669	0.37879	0.19	0.18	0.31	0.33	0.185	0.01	0.0541	0.32	0.01	0.0312	1.731	0.000179013	0.00682216	up
7530	XP_039469862.1	protein NOXP20 [Oreochromis aureus]	3770	169	0.89389	9.25807	7.16637e-11	120.75	93.25	120.75	S	SLLTTATSTVGHSLT(0.106)S(0.894)VK	S(-79)LLT(-72)T(-72)AT(-66)S(-50)T(-50)VGHS(-42)LT(-9.3)S(9.3)VK	16	3	2.6443	8727	17767	17767	F6	44865	0.15365	0.17438	0.22594	0.44603	0.15	0.17	0.28	0.38	0.16	0.01	0.0625	0.33	0.07	0.2121	2.071	0.00491091	0.0322031	up
7531	XP_039469863.1	Krueppel-like factor 3 [Oreochromis aureus]	3771	74	0.965744	18.939	0.00614311	49.482	22.809	49.482	S	S(0.004)PPCS(0.003)S(0.002)AS(0.012)T(0.012)PAS(0.966)PR	S(-23)PPCS(-25)S(-26)AS(-19)T(-19)PAS(19)PR	12	2	-0.082233	8969	18391	18391	F3	21798	0.30028	0.35646	0.14754	0.19572	0.3	0.35	0.19	0.17	0.325	0.04	0.1231	0.18	0.01	0.0556	0.557	0.00170749	0.0184754	down
7568	XP_039470726.1	C2 domain-containing protein 5 isoform X2 [Oreochromis aureus]	3791	884	0.584278	4.49077	0.0181918	44.968	23.461	44.968	S	ISGVAES(0.208)T(0.208)NIS(0.584)PR	IS(-34)GVAES(-4.5)T(-4.5)NIS(4.5)PR	11	2	-0.23723	4401	8884	8884	F3	39977	0.19172	0.1949	0.28865	0.32473	0.19	0.19	0.36	0.28	0.19	0	0	0.32	0.06	0.1875	1.685	0.00579252	0.0336824	up
7575	XP_039470803.1	endoplasmic reticulum chaperone BiP [Oreochromis aureus]	3793	645	1	74.2501	5.01817e-13	90.475	78.029	90.475	S	LYGSAGGPPPEGS(1)EQDEKDEL	LY(-84)GS(-74)AGGPPPEGS(74)EQDEKDEL	13	3	0.55537	5922	11840;11841;11842;11843;11844;11845;11846;11847;11848	11842	F3	44338	0.31216	0.39357	0.12069	0.1759	0.31	0.39	0.15	0.15	0.35	0.06	0.1714	0.15	0	0	0.434	0.00104885	0.0157204	down
7576	XP_039470818.1	endoplasmin [Oreochromis aureus]	3794	42	0.5	0	3.37145e-05	55.366	38.209	55.366	S	DGS(0.5)RT(0.5)DDEVVQREEEAIQLDGLNAAQIK	DGS(0)RT(0)DDEVVQREEEAIQLDGLNAAQIK	3	5	-2.6936	1280	2637	2637	F3	50860	0.29251	0.33676	0.14856	0.22217	0.29	0.33	0.19	0.19	0.31	0.03	0.0968	0.19	0	0	0.615	0.000952748	0.0148884	down
7633	XP_039471692.1	apoptosis facilitator Bcl-2-like protein 14 [Oreochromis aureus]	3816	31	0.997309	26.1443	0.00167863	64.52	46.711	64.52	S	SKQGS(0.997)PET(0.002)AAR	S(-36)KQGS(26)PET(-26)AAR	5	3	3.7279	8619	17589	17589	F2	15990	0.17623	0.13443	0.29463	0.39471	0.17	0.13	0.37	0.34	0.15	0.03	0.2	0.355	0.02	0.0563	2.409	0.00174113	0.018813	up
7635	XP_039471768.1	LOW QUALITY PROTEIN: ATP-dependent RNA helicase DDX54 [Oreochromis aureus]	3817	758	0.938219	11.8437	1.23824e-08	80.813	78.182	80.813	S	YKIDDT(0.062)GS(0.938)GS(0.984)DGET(0.015)GGGGR	Y(-56)KIDDT(-12)GS(12)GS(18)DGET(-18)GGGGR	8	3	-0.2549	4101;11442	23527	23527	F2	32133	0.30906	0.31108	0.15487	0.22499	0.31	0.31	0.19	0.19	0.31	0	0	0.19	0	0	0.613	2.1952e-11	1.40932e-08	down
7636	XP_039471768.1	LOW QUALITY PROTEIN: ATP-dependent RNA helicase DDX54 [Oreochromis aureus]	3817	760	0.98391	18.1669	1.23824e-08	80.813	78.182	80.813	S	YKIDDT(0.062)GS(0.938)GS(0.984)DGET(0.015)GGGGR	Y(-56)KIDDT(-12)GS(12)GS(18)DGET(-18)GGGGR	10	3	-0.2549	4101;11442	23527	23527	F2	32133	0.30906	0.31108	0.15487	0.22499	0.31	0.31	0.19	0.19	0.31	0	0	0.19	0	0	0.613	2.1952e-11	1.40932e-08	down
7641	XP_039471814.1	alpha-protein kinase 3 [Oreochromis aureus]	3819	1740	1	48.7409	0.00382166	67.704	51.741	48.741	S	KGHS(1)PQIAR	KGHS(49)PQIAR	4	4	0.7731	3110;4656	6126;6127;9424	9424	F5	14954	0.19384	0.1996	0.22598	0.38058	0.19	0.2	0.28	0.33	0.195	0.01	0.0513	0.305	0.04	0.1311	1.565	0.00294947	0.0233292	up
7642	XP_039471814.1	alpha-protein kinase 3 [Oreochromis aureus]	3819	1195	0.80321	6.12243	8.67734e-06	85.469	65.139	85.469	S	LSSKPPT(0.196)S(0.803)PAS(0.001)LR	LS(-51)S(-45)KPPT(-6.1)S(6.1)PAS(-31)LR	8	3	1.3078	5779	11565	11565	F5	31148	0.18751	0.19909	0.23155	0.38394	0.19	0.2	0.29	0.33	0.195	0.01	0.0513	0.31	0.03	0.0968	1.591	0.00141255	0.0168973	up
7643	XP_039471814.1	alpha-protein kinase 3 [Oreochromis aureus]	3819	1243	0.999829	37.6819	0.000531869	108.9	40.056	108.9	S	RDS(1)LTLIR	RDS(38)LT(-38)LIR	3	3	-0.77017	7176	14504;14505	14504	F3	36371	0.19655	0.20952	0.24496	0.34897	0.19	0.21	0.31	0.3	0.2	0.01	0.05	0.305	0.01	0.0328	1.529	0.000803144	0.0129703	up
7644	XP_039471814.1	alpha-protein kinase 3 [Oreochromis aureus]	3819	1320	0.82575	6.75677	0.00374968	56.205	29.691	56.205	S	RKS(0.826)T(0.174)LEVPK	RKS(6.8)T(-6.8)LEVPK	3	4	3.4102	7422	15080;15081	15080	F4	28912	0.18606	0.17667	0.26481	0.37246	0.18	0.17	0.33	0.32	0.175	0.01	0.0571	0.325	0.01	0.0308	1.858	6.05022e-05	0.00345266	up
7690	XP_039473171.1	pleckstrin homology-like domain family B member 2 isoform X4 [Oreochromis aureus]	3836	231	0.955493	13.3228	1.904e-08	83.245	43.221	83.245	S	KYS(0.955)AGS(0.044)LSGMTTGGHSR	KY(-51)S(13)AGS(-13)LS(-44)GMT(-72)T(-76)GGHS(-80)R	3	3	1.9473	5113	10358	10358	F5	30227	0.19686	0.14077	0.22902	0.43335	0.19	0.14	0.29	0.37	0.165	0.04	0.2424	0.33	0.06	0.1818	2.047	0.00853237	0.0424426	up
7693	XP_039473171.1	pleckstrin homology-like domain family B member 2 isoform X4 [Oreochromis aureus]	3836	618	0.993912	22.4145	0.034394	46.706	28.394	46.706	S	SFAPT(0.006)PS(0.994)PR	S(-34)FAPT(-22)PS(22)PR	7	2	-0.16265	8292	16941	16941	F5	27644	0.21301	0.19615	0.25165	0.33919	0.21	0.19	0.32	0.29	0.2	0.01	0.05	0.305	0.02	0.0656	1.529	0.00188559	0.0194977	up
7762	XP_039473695.1	microtubule-associated protein 4 isoform X6 [Oreochromis aureus]	3849	734	0.999699	35.3085	5.47619e-14	129.32	114.63	129.32	S	VEFTSSES(1)PVKVEK	VEFT(-74)S(-52)S(-35)ES(35)PVKVEK	8	4	2.1153	10699	22057;22058	22057	F3	39932	0.14935	0.13357	0.21129	0.5058	0.15	0.13	0.27	0.44	0.14	0.01	0.0714	0.355	0.12	0.3380	2.549	0.00864834	0.0425708	up
7762	XP_039473696.1	microtubule-associated protein 4 isoform X7 [Oreochromis aureus]	3850	533	0.999699	35.3085	5.47619e-14	129.32	114.63	129.32	S	VEFTSSES(1)PVKVEK	VEFT(-74)S(-52)S(-35)ES(35)PVKVEK	8	4	2.1153	10699	22057;22058	22057	F3	39932	0.14935	0.13357	0.21129	0.5058	0.15	0.13	0.27	0.44	0.14	0.01	0.0714	0.355	0.12	0.3380	2.549	0.00864834	0.0425708	up
7770	XP_039473897.1	apoptosis-associated speck-like protein containing a CARD [Oreochromis aureus]	3855	171	0.592166	1.6196	0.00237254	73.233	52.234	73.233	S	ELFS(0.592)S(0.408)PLK	ELFS(1.6)S(-1.6)PLK	4	3	0.86484	2067	4139	4139	F4	44702	0.18267	0.14892	0.21115	0.45726	0.18	0.15	0.27	0.39	0.165	0.02	0.1212	0.33	0.08	0.2424	2.017	0.0104845	0.0476737	up
7773	XP_039474085.1	neurofibromin 2b (merlin) [Oreochromis aureus]	3858	391	1	96.6404	0.000662372	96.64	26.152	96.64	S	RLS(1)MEIER	RLS(97)MEIER	3	3	-0.90702	7464	15154	15154	F3	35968	0.19231	0.2072	0.22815	0.37233	0.19	0.2	0.29	0.32	0.195	0.01	0.0513	0.305	0.02	0.0656	1.565	0.000800215	0.0129703	up
7778	XP_039474233.1	stromal interaction molecule 1-like isoform X3 [Oreochromis aureus]	3863	182	1	91.812	4.63549e-06	91.812	57.062	91.812	S	AEQS(1)LLDLQEK	AEQS(92)LLDLQEK	4	2	2.9972	278	584;585	585	F3	45951	0.18456	0.21823	0.26277	0.33444	0.18	0.22	0.33	0.29	0.2	0.03	0.15	0.31	0.03	0.0968	1.566	0.00771619	0.0391862	up
7810	XP_039474469.1	catenin delta-1 isoform X3 [Oreochromis aureus]	3873	220	0.99998	47.0649	0.00063946	63.376	40.047	59.814	S	APS(1)RQQLDPYAAQPQVGR	APS(47)RQQLDPY(-47)AAQPQVGR	3	3	-1.0742	725;10099	1611;1612;20802	1612	F5	31759	0.20445	0.17794	0.21961	0.39943	0.2	0.18	0.28	0.34	0.19	0.01	0.0526	0.31	0.04	0.1290	1.636	0.00467938	0.031286	up
7810	XP_039474474.1	catenin delta-1 isoform X4 [Oreochromis aureus]	3874	142	0.99998	47.0649	0.00063946	63.376	40.047	59.814	S	APS(1)RQQLDPYAAQPQVGR	APS(47)RQQLDPY(-47)AAQPQVGR	3	3	-1.0742	725;10099	1611;1612;20802	1612	F5	31759	0.20445	0.17794	0.21961	0.39943	0.2	0.18	0.28	0.34	0.19	0.01	0.0526	0.31	0.04	0.1290	1.636	0.00467938	0.031286	up
7831	XP_039474821.1	neuroblast differentiation-associated protein AHNAK isoform X1 [Oreochromis aureus]	3887	6538	1	67.1024	2.44338e-05	82.202	64.47	82.202	S	FGTFGGFGS(1)K	FGT(-67)FGGFGS(67)K	9	3	-0.86586	2539	4985;4986;4987	4987	F6	44991	0.30789	0.29258	0.15365	0.23493	0.3	0.29	0.19	0.2	0.295	0.01	0.0339	0.195	0.01	0.0513	0.661	0.000179463	0.00682216	down
7837	XP_039474821.1	neuroblast differentiation-associated protein AHNAK isoform X1 [Oreochromis aureus]	3887	209	0.999993	52.8789	3.18854e-05	99.161	82.811	99.161	S	HES(1)GDGSSHIR	HES(53)GDGS(-53)S(-58)HIR	3	3	0.36403	3755	7470;7471	7470	F1	12761	0.34028	0.26415	0.14801	0.17765	0.34	0.26	0.19	0.15	0.3	0.06	0.2	0.17	0.03	0.1765	0.577	0.0119808	0.0494908	down
7854	XP_039474999.1	sperm-associated antigen 1 isoform X2 [Oreochromis aureus]	3890	784	0.993934	22.1449	5.9439e-06	87.519	61.477	87.519	S	QSLAS(0.006)PS(0.994)PNKPR	QS(-61)LAS(-22)PS(22)PNKPR	7	3	1.9048	6969	13980;13981;13982;13983	13982	F4	25200	0.17177	0.19561	0.27609	0.35653	0.17	0.19	0.35	0.31	0.18	0.01	0.0556	0.33	0.03	0.0909	1.839	0.00103805	0.0156193	up
7873	XP_039475457.1	vicilin-like seed storage protein At2g18540 [Oreochromis aureus]	3897	89	0.992963	21.4954	1.20178e-23	146.81	27.535	146.81	S	LFS(0.007)S(0.993)FLK	LFS(-21)S(21)FLK	4	2	0.39996	5295	10674	10674	F6	48688	0.34342	0.30863	0.13215	0.21581	0.34	0.31	0.17	0.19	0.325	0.02	0.0615	0.18	0.01	0.0556	0.555	0.00076428	0.0128559	down
7895	XP_039476119.1	ATP-binding cassette, sub-family B (MDR/TAP), member 4 [Oreochromis aureus]	3908	640	0.997254	25.6007	3.28692e-08	115.11	98.09	115.11	S	NAEEEHEQS(0.003)ADERS(0.997)PGIR	NAEEEHEQS(-26)ADERS(26)PGIR	14	3	0.084256	6200	12413	12413	F2	21913	0.33083	0.30173	0.13966	0.22778	0.33	0.3	0.18	0.2	0.315	0.02	0.0635	0.19	0.01	0.0526	0.605	0.00117026	0.0159874	down
7939	XP_039477001.1	NPC1-like intracellular cholesterol transporter 1 [Oreochromis aureus]	3928	1328	0.999994	52.1098	9.95124e-61	158.62	140.07	158.62	S	QVYDNIS(1)YEGNEIKQDPYSNTVDESGSK	QVY(-86)DNIS(52)Y(-52)EGNEIKQDPY(-72)S(-74)NT(-80)VDES(-110)GS(-120)K	7	4	0.04421	7082;7083	14312;14313;14315	14315	F4	43095	0.32553	0.28363	0.15536	0.22336	0.32	0.28	0.2	0.19	0.3	0.03	0.1	0.195	0.01	0.0513	0.653	0.00189308	0.0194977	down
7957	XP_039477444.1	matrin 3-like 1.1 isoform X5 [Oreochromis aureus]	3938	902	0.999264	31.4284	0.000678017	57.173	35.574	57.173	S	ETSEEEFEY(0.001)KKS(0.999)PK	ET(-51)S(-50)EEEFEY(-31)KKS(31)PK	12	5	2.95	2362	4661	4661	F3	34222	0.1565	0.14763	0.21826	0.47762	0.15	0.15	0.27	0.41	0.15	0	0	0.34	0.10	0.2941	2.267	0.00705794	0.0372173	up
7961	XP_039477487.1	ligand-dependent corepressor isoform X3 [Oreochromis aureus]	3941	583	1	40.4755	0.00813426	40.475	15.134	40.475	S	DLQNS(1)QHS(1)LY(1)DK	DLQNS(40)QHS(40)LY(40)DK	5	2	-2.5953	1422	2881	2881	F3	50176	0.28225	0.48135	0.090044	0.14635	0.28	0.48	0.11	0.13	0.38	0.14	0.3684	0.12	0.01	0.0833	0.339	0.00629498	0.0356069	down
7962	XP_039477487.1	ligand-dependent corepressor isoform X3 [Oreochromis aureus]	3941	586	1	40.4755	0.00813426	40.475	15.134	40.475	S	DLQNS(1)QHS(1)LY(1)DK	DLQNS(40)QHS(40)LY(40)DK	8	2	-2.5953	1422	2881	2881	F3	50176	0.28225	0.48135	0.090044	0.14635	0.28	0.48	0.11	0.13	0.38	0.14	0.3684	0.12	0.01	0.0833	0.339	0.00629498	0.0356069	down
7991	XP_039477844.1	ankyrin-3 [Oreochromis aureus]	3954	4032	0.844491	8.31529	0.00184203	62.338	40.832	62.338	S	S(0.844)VS(0.124)S(0.031)DLLDRR	S(8.3)VS(-8.3)S(-14)DLLDRR	1	3	-1.0619	9686	19886	19886	F3	36679	0.1635	0.18624	0.26232	0.38793	0.16	0.18	0.33	0.33	0.17	0.01	0.0588	0.33	0	0	1.947	0.000291868	0.00820458	up
8028	XP_039478764.1	flocculation protein FLO11-like [Oreochromis aureus]	3972	365	0.523897	0.721525	0.000138704	52.92	38.157	52.92	S	S(0.524)DVKVS(0.444)PVPT(0.018)S(0.006)T(0.006)VPT(0.001)S(0.001)T(0.001)VPTSTATK	S(0.72)DVKVS(-0.72)PVPT(-15)S(-19)T(-19)VPT(-30)S(-30)T(-30)VPT(-36)S(-42)T(-42)AT(-51)K	1	4	1.8985	8188	16770	16770	F5	34327	0.34055	0.36473	0.12832	0.16641	0.34	0.36	0.16	0.14	0.35	0.01	0.0286	0.15	0.01	0.0667	0.429	0.000263302	0.0076821	down
8029	XP_039478764.1	flocculation protein FLO11-like [Oreochromis aureus]	3972	370	0.916991	12.8643	3.16737e-08	66.479	54.283	66.479	S	S(0.047)DVKVS(0.917)PVPT(0.012)S(0.012)T(0.012)VPTSTVPTSTATK	S(-13)DVKVS(13)PVPT(-19)S(-19)T(-19)VPT(-38)S(-38)T(-38)VPT(-43)S(-48)T(-53)AT(-60)K	6	4	2.022	8188	16768	16768	F4	37193	0.34903	0.33824	0.11922	0.19351	0.35	0.33	0.15	0.17	0.34	0.01	0.0294	0.16	0.01	0.0625	0.471	0.000316579	0.00861811	down
8030	XP_039478764.1	flocculation protein FLO11-like [Oreochromis aureus]	3972	410	0.890737	9.93763	2.18082e-34	119.78	110.32	119.78	S	S(0.09)DVKVS(0.891)PVPT(0.017)S(0.001)T(0.001)VPTSTVPTSTVPTSTATK	S(-9.9)DVKVS(9.9)PVPT(-17)S(-29)T(-29)VPT(-59)S(-70)T(-70)VPT(-89)S(-93)T(-96)VPT(-110)S(-110)T(-110)AT(-120)K	6	4	-0.86981	8189	16771	16771	F5	36509	0.33821	0.47623	0.090765	0.094798	0.33	0.47	0.11	0.08	0.4	0.1	0.25	0.095	0.02	0.2105	0.245	0.00187163	0.0194589	down
8060	XP_031581712.2	myristoylated alanine-rich protein kinase C substrate a [Oreochromis aureus]	108	115	0.999983	48.7518	7.19467e-199	218.12	190.82	218.12	T	AEDGAAASTSTET(1)PK	AEDGAAAS(-76)T(-63)S(-56)T(-49)ET(49)PK	13	2	1.7862	226	471;472;473	473	F2	24416	0.19837	0.20194	0.27763	0.35909	0.2	0.2	0.35	0.31	0.2	0	0	0.33	0.03	0.0909	1.65	0.000750351	0.0127609	up
8075	XP_031582107.2	deleted in malignant brain tumors 1 protein-like [Oreochromis aureus]	144	479	0.999948	42.8101	0.0144305	75.849	52.945	75.849	T	ATDCGT(1)PQR	AT(-43)DCGT(43)PQR	6	2	-1.4533	926	1981	1981	F1	12698	0.41968	0.33738	0.098671	0.14427	0.42	0.33	0.12	0.12	0.375	0.06	0.16	0.12	0	0	0.325	0.000507179	0.00977137	down
8105	XP_031582953.1	mRNA decay activator protein ZFP36L1a [Oreochromis aureus]	236	133	0.5103	0.192452	9.16859e-180	209.42	185.23	209.42	T	CLGPAS(0.488)PT(0.51)GS(0.001)SSQVNSSR	CLGPAS(-0.19)PT(0.19)GS(-27)S(-32)S(-41)QVNS(-98)S(-99)R	8	2	-2.2825	1100	2301	2301	F4	27989	0.42507	0.30767	0.10298	0.16428	0.42	0.3	0.13	0.14	0.36	0.08	0.2222	0.135	0.01	0.0741	0.386	0.00230122	0.0224413	down
8166	XP_031584381.1	E3 ubiquitin-protein ligase RBBP6 isoform X2 [Oreochromis aureus]	383	690	0.705889	10.5599	0.0130727	45.863	30.891	45.863	T	S(0.498)RS(0.498)PT(0.706)PS(0.064)S(0.059)S(0.054)S(0.058)S(0.062)PR	S(0)RS(0)PT(11)PS(-11)S(-11)S(-11)S(-11)S(-11)PR	5	2	0.24787	9178	18812	18812	F2	11539	0.19097	0.19244	0.25676	0.35984	0.19	0.19	0.32	0.31	0.19	0	0	0.315	0.01	0.0317	1.658	1.26632e-05	0.000920355	up
8167	XP_031584428.1	T-box transcription factor TBX2b isoform X2 [Oreochromis aureus]	391	346	0.883922	8.81645	3.24582e-08	86.006	75.748	86.006	T	DDKT(0.116)CT(0.884)DS(1)EQELEHQDER	DDKT(-8.8)CT(8.8)DS(44)EQELEHQDER	6	3	0.58707	1190	2487;2488	2488	F2	26576	0.17479	0.21267	0.22979	0.38274	0.17	0.21	0.29	0.33	0.19	0.03	0.1579	0.31	0.03	0.0968	1.65	0.00624937	0.0354269	up
8191	XP_031585110.2	LOW QUALITY PROTEIN: E3 SUMO-protein ligase RanBP2 [Oreochromis aureus]	452	1998	1	90.3665	9.2033e-05	90.367	68.903	90.367	T	LLLDIPLQT(1)PHK	LLLDIPLQT(90)PHK	9	3	0.88669	5518	11090	11090	F6	47665	0.20115	0.20025	0.21146	0.38714	0.2	0.2	0.27	0.33	0.2	0	0	0.3	0.04	0.1333	1.5	0.00620721	0.0353439	up
8199	XP_031585134.1	protein NDRG1a [Oreochromis aureus]	458	344	0.512781	0.298195	0.00682425	55.196	18.904	55.196	T	S(0.478)HT(0.513)S(0.014)EGNRS(0.995)R	S(-0.3)HT(0.3)S(-17)EGNRS(22)R	3	2	-0.58628	8517	17414	17414	F1	7028	0.32914	0.47639	0.060054	0.13442	0.33	0.47	0.08	0.12	0.4	0.1	0.25	0.1	0.03	0.3000	0.258	0.00295706	0.0233414	down
8213	XP_031585459.1	DNA repair protein complementing XP-G cells homolog isoform X2 [Oreochromis aureus]	488	959	0.637064	2.8675	0.00824371	49.266	41.274	49.266	T	EGGAEEEEDDS(0.998)EDDT(0.637)HS(0.33)PS(0.035)K	EGGAEEEEDDS(27)EDDT(2.9)HS(-2.9)PS(-13)K	15	3	-0.747	1936	3866	3866	F1	20898	0.33082	0.33771	0.12968	0.2018	0.33	0.33	0.16	0.17	0.33	0	0	0.165	0.01	0.0606	0.5	3.42923e-05	0.00222006	down
8215	XP_031585599.2	apoptotic chromatin condensation inducer 1b isoform X1 [Oreochromis aureus]	496	1124	0.908329	9.96007	0.000192458	71.781	58.58	71.781	T	EKDGS(1)VAT(0.908)S(0.092)GGAAGR	EKDGS(49)VAT(10)S(-10)GGAAGR	8	2	-3.7297	1281;2029	4068	4068	F2	21284	0.43488	0.43142	0	0.1337	0.43	0.43	0	0.12	0.43	0	0	0.12	--	--	0.279	8.93773e-05	0.00456002	down
8215	XP_039465691.1	apoptotic chromatin condensation inducer 1b isoform X4 [Oreochromis aureus]	3666	1094	0.908329	9.96007	0.000192458	71.781	58.58	71.781	T	EKDGS(1)VAT(0.908)S(0.092)GGAAGR	EKDGS(49)VAT(10)S(-10)GGAAGR	8	2	-3.7297	1281;2029	4068	4068	F2	21284	0.43488	0.43142	0	0.1337	0.43	0.43	0	0.12	0.43	0	0	0.12	--	--	0.279	8.93773e-05	0.00456002	down
8219	XP_031585599.2	apoptotic chromatin condensation inducer 1b isoform X1 [Oreochromis aureus]	496	647	0.573601	1.28907	6.08908e-13	120.79	101.54	120.79	T	T(0.574)S(0.426)PATTDGGAGETETGTAAGR	T(1.3)S(-1.3)PAT(-37)T(-50)DGGAGET(-93)ET(-100)GT(-110)AAGR	1	2	0.25516	10368	21354;21356	21356	F2	23872	0.31386	0.3282	0.13178	0.22616	0.31	0.32	0.17	0.19	0.315	0.01	0.0317	0.18	0.01	0.0556	0.572	0.000467908	0.00940266	down
8219	XP_039465691.1	apoptotic chromatin condensation inducer 1b isoform X4 [Oreochromis aureus]	3666	617	0.573601	1.28907	6.08908e-13	120.79	101.54	120.79	T	T(0.574)S(0.426)PATTDGGAGETETGTAAGR	T(1.3)S(-1.3)PAT(-37)T(-50)DGGAGET(-93)ET(-100)GT(-110)AAGR	1	2	0.25516	10368	21354;21356	21356	F2	23872	0.31386	0.3282	0.13178	0.22616	0.31	0.32	0.17	0.19	0.315	0.01	0.0317	0.18	0.01	0.0556	0.572	0.000467908	0.00940266	down
8248	XP_031586863.2	heterogeneous nuclear ribonucleoprotein C-like isoform X2 [Oreochromis aureus]	620	241	0.528313	0.551835	7.30034e-08	97.457	75.236	41.76	T	S(0.003)MKPEPGEVT(0.528)S(0.465)PPHPS(0.004)NK	S(-23)MKPEPGEVT(0.55)S(-0.55)PPHPS(-21)NK	10	4	0.6606	8838;8839	18038;18040	18038	F3	30187	0.35932	0.27334	0.14846	0.21889	0.36	0.27	0.19	0.19	0.315	0.06	0.1905	0.19	0	0	0.616	0.00945414	0.0451548	down
8274	XP_031587666.1	apoptosis inhibitor 5 [Oreochromis aureus]	703	460	0.581182	1.42288	2.70925e-05	79.511	64.589	79.511	T	RPS(0.419)T(0.581)EEMGSGGSTK	RPS(-1.4)T(1.4)EEMGS(-56)GGS(-65)T(-74)K	4	3	-0.095388	7623	15517;15523	15517	F3	16999	0.36903	0.35442	0.11402	0.16253	0.37	0.35	0.14	0.14	0.36	0.01	0.0278	0.14	0	0	0.389	1.13839e-05	0.000851472	down
8308	XP_031589217.1	eukaryotic translation initiation factor 4E-binding protein 3-like [Oreochromis aureus]	869	33	0.999539	33.6556	1.07623e-84	172.18	154.76	172.18	T	DWSQLPDCYSQT(1)PGGTLFS(0.002)T(0.097)T(0.891)PGGT(0.009)R	DWS(-73)QLPDCY(-47)S(-34)QT(34)PGGT(-62)LFS(-26)T(-9.6)T(9.6)PGGT(-20)R	12	3	-0.9173	1679	3371;3372	3372	F5	47075	0.356	0.31954	0.12535	0.19912	0.35	0.32	0.16	0.17	0.335	0.02	0.0597	0.165	0.01	0.0606	0.494	0.000187284	0.00684975	down
8310	XP_031589217.1	eukaryotic translation initiation factor 4E-binding protein 3-like [Oreochromis aureus]	869	42	0.934823	13.2763	1.07623e-84	172.18	154.76	134.48	T	DWSQLPDCYSQTPGGTLFS(0.002)T(0.044)T(0.935)PGGT(0.019)R	DWS(-120)QLPDCY(-100)S(-100)QT(-82)PGGT(-56)LFS(-26)T(-13)T(13)PGGT(-17)R	21	3	-0.81869	1679	3370;3371;3372	3370	F6	47195	0.65625	0.63679	0.25519	0.45177	0.65	0.63	0.32	0.39	0.64	0.01	0.0156	0.355	0.05	0.1408	0.555	0.00197127	0.0201878	down
8328	XP_031589781.1	betaine--homocysteine S-methyltransferase 1-like [Oreochromis aureus]	927	384	0.5	0	2.23827e-110	192.55	163.97	192.55	T	EAT(0.5)S(0.5)KEQLEALFDK	EAT(0)S(0)KEQLEALFDK	3	4	1.1711	1807	3605	3605	F4	47977	0.16005	0.15532	0.33785	0.34678	0.16	0.15	0.43	0.3	0.155	0.01	0.0645	0.365	0.09	0.2466	2.357	0.00413318	0.0285323	up
8393	XP_039457924.1	eukaryotic translation initiation factor 4 gamma 1a isoform X4 [Oreochromis aureus]	1087	213	0.99411	23.1407	2.17326e-34	138.34	122.24	138.34	T	DDNTEGPT(0.001)S(0.005)AET(0.994)PPSLAAGNAEPVLESK	DDNT(-45)EGPT(-32)S(-23)AET(23)PPS(-34)LAAGNAEPVLES(-110)K	12	3	2.5901	1192	2492;2493;2494	2492	F3	45754	0.16868	0.15902	0.27875	0.39354	0.17	0.16	0.35	0.34	0.165	0.01	0.0606	0.345	0.01	0.0290	2.093	4.01819e-05	0.00253739	up
8411	XP_031591940.1	serine/threonine-protein phosphatase 6 regulatory subunit 2a isoform X2 [Oreochromis aureus]	1132	784	0.625712	2.32347	2.38878e-05	114.21	88.866	87.083	T	SDVS(0.008)T(0.626)S(0.366)PGPAGEGR	S(-45)DVS(-19)T(2.3)S(-2.3)PGPAGEGR	5	2	-1.4621	8192	16774	16774	F1	20133	0.19598	0.16926	0.24045	0.39431	0.19	0.17	0.3	0.34	0.18	0.01	0.0556	0.32	0.03	0.0938	1.783	0.00127696	0.0165897	up
8416	XP_039460215.1	serine/threonine-protein kinase mTOR [Oreochromis aureus]	1141	2440	0.538998	0.802399	5.66642e-28	133.95	131.6	133.95	T	AGT(0.539)T(0.448)VPES(0.011)IHS(0.002)FIGDGLVQPEALNK	AGT(0.8)T(-0.8)VPES(-17)IHS(-25)FIGDGLVQPEALNK	3	4	-1.0131	407	862;864	864	F6	47826	0.62525	0.63615	0.29296	0.44564	0.62	0.63	0.37	0.38	0.625	0.01	0.016	0.375	0.01	0.0267	0.6	1.236e-05	0.000915594	down
8417	XP_039460215.1	serine/threonine-protein kinase mTOR [Oreochromis aureus]	1141	2441	0.500505	0	3.48251e-06	62.284	42.309	62.284	T	AGT(0.501)T(0.501)VPES(0.522)IHS(0.477)FIGDGLVQPEALNK	AGT(0)T(0)VPES(0.39)IHS(-0.39)FIGDGLVQPEALNK	4	4	-1.4377	407	862	862	F4	51799	0.3055	0.33069	0.13552	0.22829	0.3	0.33	0.17	0.2	0.315	0.02	0.0635	0.185	0.02	0.1081	0.589	0.00225797	0.0222322	down
8441	XP_031592829.1	protein numb homolog isoform X7 [Oreochromis aureus]	1229	585	0.543139	1.04244	0.00521212	55.33	36.255	55.33	T	QRT(0.543)T(0.452)PS(0.38)PT(0.616)NPFS(0.004)T(0.005)ELQK	QRT(1)T(-1)PS(-2.4)PT(2.4)NPFS(-22)T(-21)ELQK	3	3	-0.35437	6958;10454	13955	13955	F4	42775	0.30735	0.31008	0.1577	0.22488	0.3	0.31	0.2	0.19	0.305	0.01	0.0328	0.195	0.01	0.0513	0.639	0.00013465	0.00545972	down
8443	XP_031592829.1	protein numb homolog isoform X7 [Oreochromis aureus]	1229	590	0.61587	2.42112	0.00521212	55.33	36.255	55.33	T	QRT(0.543)T(0.452)PS(0.38)PT(0.616)NPFS(0.004)T(0.005)ELQK	QRT(1)T(-1)PS(-2.4)PT(2.4)NPFS(-22)T(-21)ELQK	8	3	-0.35437	6958;10454	13955	13955	F4	42775	0.30735	0.31008	0.1577	0.22488	0.3	0.31	0.2	0.19	0.305	0.01	0.0328	0.195	0.01	0.0513	0.639	0.00013465	0.00545972	down
8461	XP_031593376.2	ribosome-binding protein 1a isoform X1 [Oreochromis aureus]	1274	285	0.944158	12.5111	0.0261669	58.172	28.825	58.172	T	S(0.001)AS(0.002)APT(0.944)PT(0.053)AAK	S(-28)AS(-28)APT(13)PT(-13)AAK	6	2	-1.5666	7985	16294	16294	F3	25147	0.21343	0.19179	0.24078	0.354	0.21	0.19	0.3	0.3	0.2	0.01	0.05	0.3	0	0	1.504	0.000769597	0.0129172	up
8462	XP_031593376.2	ribosome-binding protein 1a isoform X1 [Oreochromis aureus]	1274	272	0.925116	15.0734	0.00527213	61.616	44.737	61.616	T	S(0.001)AS(0.001)APT(0.029)S(0.029)AKAT(0.925)PPPAS(0.007)T(0.009)K	S(-32)AS(-31)APT(-15)S(-15)AKAT(15)PPPAS(-21)T(-20)K	11	3	4.1067	7986	16295	16295	F4	24615	0.15848	0.11754	0.24	0.48398	0.16	0.12	0.3	0.42	0.14	0.03	0.2143	0.36	0.08	0.2222	2.625	0.00518247	0.0322031	up
8486	XP_039461623.1	protein PRRC2A isoform X2 [Oreochromis aureus]	1347	836	1	40.3813	6.48247e-05	71.527	41.636	40.381	T	QQQHPGHPHRGT(1)PPMDPK	QQQHPGHPHRGT(40)PPMDPK	12	5	0.31036	6925	13880;13881;13882	13882	F4	16573	0.19895	0.21343	0.26387	0.33515	0.2	0.21	0.33	0.29	0.205	0.01	0.0488	0.31	0.03	0.0968	1.513	0.00193303	0.0198561	up
8512	XP_031594244.1	DENN domain-containing protein 1A isoform X2 [Oreochromis aureus]	1384	693	0.999999	62.8581	2.38064e-60	158.99	140.27	158.99	T	KT(1)PELGSVLTPPTAQSCSKPAGTGEGR	KT(63)PELGS(-63)VLT(-110)PPT(-140)AQS(-150)CS(-150)KPAGT(-150)GEGR	2	4	-0.16949	5033;5034	10210;10211;10212;10213;10214	10213	F5	35648	0.33707	0.29098	0.13776	0.21568	0.33	0.29	0.17	0.19	0.31	0.03	0.0968	0.18	0.01	0.0556	0.583	0.00159257	0.0175637	down
8519	XP_031594366.1	vacuolar protein sorting-associated protein 26B-like [Oreochromis aureus]	1398	332	0.803208	5.83453	0.0249688	43.083	39.551	43.083	T	FRGHNS(0.246)EEDT(0.803)S(0.951)	FRGHNS(-5.8)EEDT(5.8)S(12)	10	2	-1.1261	2653;3104	5187	5187	F2	19290	0.21291	0.18224	0.23366	0.37119	0.21	0.18	0.29	0.32	0.195	0.02	0.1026	0.305	0.02	0.0656	1.574	0.00341417	0.0256685	up
8569	XP_031596248.1	R3H domain-containing protein 2 isoform X9 [Oreochromis aureus]	1552	27	0.582155	1.44027	0.0117734	66.533	50.993	66.533	T	GKT(0.582)S(0.418)PQPQGTK	GKT(1.4)S(-1.4)PQPQGT(-52)K	3	3	3.3573	3189	6309	6309	F3	19060	0.21011	0.18472	0.22516	0.38002	0.21	0.18	0.28	0.33	0.195	0.02	0.1026	0.305	0.04	0.1311	1.573	0.00631871	0.0356625	up
8581	XP_039475256.1	MAP7 domain-containing protein 1a isoform X6 [Oreochromis aureus]	1577	455	1	78.8139	0.000973485	78.814	27.917	78.814	T	QPHRPAT(1)PEEK	QPHRPAT(79)PEEK	7	4	1.59	6882	13790;13791	13791	F3	18323	0.20653	0.20152	0.24836	0.34035	0.2	0.2	0.31	0.29	0.2	0	0	0.3	0.01	0.0333	1.5	0.000235213	0.00716239	up
8583	XP_039475256.1	MAP7 domain-containing protein 1a isoform X6 [Oreochromis aureus]	1577	400	0.717315	6.60296	0.00738033	54.672	39.75	52.483	T	T(0.717)AS(0.132)PS(0.153)PAAS(0.943)PKPPS(0.026)T(0.028)R	T(6.6)AS(-7.5)PS(-6.6)PAAS(15)PKPPS(-15)T(-15)R	1	3	1.4138	9806	20174;20175	20174	F3	24028	0.21029	0.17032	0.24828	0.37111	0.21	0.17	0.31	0.32	0.19	0.03	0.1579	0.315	0.01	0.0317	1.676	0.00368568	0.0263155	up
8594	XP_039461804.1	CTP synthase 1 [Oreochromis aureus]	1597	576	0.914626	12.684	2.2525e-24	97.916	83.863	77.191	T	S(0.048)GS(0.168)S(0.828)T(0.915)PDS(0.042)EISELK	S(-15)GS(-8.3)S(8.3)T(13)PDS(-16)EIS(-59)ELK	5	3	0.36276	1630;1631;8446;8447	17250;17251	17251	F2	42918	0.32538	0.34046	0.13266	0.20149	0.32	0.34	0.17	0.17	0.33	0.01	0.0303	0.17	0	0	0.516	3.95079e-05	0.0025364	down
8598	XP_039477626.1	echinoderm microtubule-associated protein-like 4 isoform X2 [Oreochromis aureus]	1604	160	1	50.6068	0.0373252	50.607	39.734	50.607	T	GHT(1)PPKR	GHT(51)PPKR	3	3	2.945	3111	6128	6128	F3	11051	0.16023	0.099091	0.27832	0.46236	0.16	0.1	0.35	0.4	0.13	0.04	0.3077	0.375	0.04	0.1067	3.047	0.00456656	0.0308333	up
8611	XP_039476336.1	rab11 family-interacting protein 5 isoform X2 [Oreochromis aureus]	1635	157	1	59.2475	0.000618495	59.248	34.223	59.248	T	NNMT(1)AS(1)MFDLT(1)MK	NNMT(59)AS(59)MFDLT(59)MK	4	2	0.55114	6370	12751;12752	12751	F2	47854	0.27616	0.58575	0.05163	0.086457	0.27	0.58	0.06	0.07	0.425	0.22	0.5176	0.065	0.01	0.1538	0.176	0.00402738	0.0281041	down
8612	XP_039476336.1	rab11 family-interacting protein 5 isoform X2 [Oreochromis aureus]	1635	164	1	59.2475	0.000618495	59.248	34.223	59.248	T	NNMT(1)AS(1)MFDLT(1)MK	NNMT(59)AS(59)MFDLT(59)MK	11	2	0.55114	6370	12751;12752	12751	F2	47854	0.27616	0.58575	0.05163	0.086457	0.27	0.58	0.06	0.07	0.425	0.22	0.5176	0.065	0.01	0.1538	0.176	0.00402738	0.0281041	down
8633	XP_031598114.1	BCL2 interacting protein 4 [Oreochromis aureus]	1699	78	1	71.548	0.00135771	76.073	38.881	71.548	T	RAQT(1)PLLLWK	RAQT(72)PLLLWK	4	3	2.1942	773;7116	1713;14377	14377	F6	43145	0.17582	0.18417	0.25666	0.38335	0.17	0.18	0.32	0.33	0.175	0.01	0.0571	0.325	0.01	0.0308	1.859	6.05022e-05	0.00345266	up
8744	XP_031601323.2	protein TASOR isoform X2 [Oreochromis aureus]	1980	1704	0.926432	11.219	0.0273106	57.425	42.453	57.425	T	NAS(0.004)GT(0.926)PT(0.07)QPDR	NAS(-24)GT(11)PT(-11)QPDR	5	2	1.4576	6212	12446	12446	F2	14343	0.17316	0.20568	0.2675	0.35366	0.17	0.2	0.34	0.3	0.185	0.02	0.1081	0.32	0.03	0.0938	1.741	0.00265132	0.0230964	up
8760	XP_031601872.1	RNA-binding protein with serine-rich domain 1-like isoform X2 [Oreochromis aureus]	2014	128	0.999791	36.7998	0.00478025	66.19	40.531	62.924	T	RS(1)PT(1)PKPTK	RS(42)PT(37)PKPT(-37)K	4	3	1.5408	7729;9031	15739;18499;18500;18502	15739	F3	19436	0.53065	0.80745	0.27923	0.37524	0.53	0.8	0.35	0.32	0.665	0.19	0.2857	0.335	0.02	0.0597	0.525	0.0120009	0.0495473	down
8814	XP_031603773.1	Golgi-specific brefeldin A-resistance guanine nucleotide exchange factor 1 isoform X2 [Oreochromis aureus]	2205	1337	0.889775	9.06999	1.02349e-77	174.52	120.18	174.52	T	S(0.11)AT(0.89)DVDVASSGWLVVGK	S(-9.1)AT(9.1)DVDVAS(-98)S(-98)GWLVVGK	3	2	2.8746	8036;8037	16384;16385;16386	16385	F5	46929	0.18675	0.22357	0.25958	0.32412	0.18	0.22	0.33	0.28	0.2	0.03	0.15	0.305	0.04	0.1311	1.541	0.0108924	0.047895	up
8830	XP_031604045.2	plectin isoform X2 [Oreochromis aureus]	2234	4898	1	113.347	1.50462e-07	113.35	71.969	113.35	T	KQIT(1)IEELIR	KQIT(110)IEELIR	4	3	1.9575	4892	9895	9895	F4	47205	0.1997	0.20132	0.25179	0.34719	0.2	0.2	0.32	0.3	0.2	0	0	0.31	0.01	0.0323	1.55	0.000168981	0.00654185	up
8904	XP_031606151.1	putative monooxygenase p33MONOX isoform X2 [Oreochromis aureus]	2419	172	0.707946	5.74406	3.41709e-13	98.019	80.861	98.019	T	QSSSAHS(0.015)T(0.082)PS(0.195)NT(0.708)PHS(0.608)S(0.392)PKPQR	QS(-45)S(-46)S(-39)AHS(-17)T(-9.4)PS(-5.7)NT(5.7)PHS(2)S(-2)PKPQR	12	4	0.52346	7001	14112	14112	F3	13431	0.18257	0.19149	0.24109	0.38486	0.18	0.19	0.3	0.33	0.185	0.01	0.0541	0.315	0.02	0.0635	1.704	0.000457002	0.00940266	up
8905	XP_031606153.2	rab GTPase-binding effector protein 1 isoform X2 [Oreochromis aureus]	2420	587	1	44.105	0.0118948	44.105	13.689	44.105	T	QNLEDS(1)VKAGNEET(1)AAK	QNLEDS(44)VKAGNEET(44)AAK	14	4	2.5355	6868	13755	13755	F2	25057	0.3785	0.29497	0.1329	0.19363	0.37	0.29	0.17	0.17	0.33	0.06	0.1818	0.17	0	0	0.522	0.00262212	0.0230964	down
8916	XP_031606222.1	cyclic AMP-dependent transcription factor ATF-1 isoform X2 [Oreochromis aureus]	2430	206	0.561233	1.0724	5.49203e-17	111.97	90.11	111.97	T	TAPTSTSLPQTVVMT(0.561)S(0.438)PVGLSQTK	T(-64)APT(-57)S(-57)T(-57)S(-54)LPQT(-43)VVMT(1.1)S(-1.1)PVGLS(-33)QT(-45)K	15	3	-1.2762	9784	20069	20069	F6	43237	0.30797	0.3029	0.1598	0.22933	0.3	0.3	0.2	0.2	0.3	0	0	0.2	0	0	0.667	3.00672e-11	1.65455e-08	down
8929	XP_031606762.1	uncharacterized protein akt1s1 [Oreochromis aureus]	2474	345	1	80.3867	4.07011e-05	80.387	62.721	80.387	T	LNT(1)GDFS(1)LKQ	LNT(80)GDFS(80)LKQ	3	3	0.088734	5600	11254	11254	F3	44590	0.36607	0.3822	0.094273	0.15745	0.36	0.38	0.12	0.14	0.37	0.01	0.027	0.13	0.01	0.0769	0.352	0.000197963	0.00684975	down
8932	XP_039459459.1	la-related protein 1B isoform X5 [Oreochromis aureus]	2476	1052	0.585454	1.50425	2.01403e-12	91.725	74.577	91.725	T	SSSTSAESASASAAAQT(0.585)T(0.414)PKDK	S(-70)S(-69)S(-65)T(-65)S(-59)AES(-42)AS(-35)AS(-33)AAAQT(1.5)T(-1.5)PKDK	17	3	0.21197	9454;9455	19426	19426	F3	27215	0.29528	0.34848	0.14075	0.21549	0.29	0.34	0.18	0.19	0.315	0.04	0.127	0.185	0.01	0.0541	0.591	0.00165604	0.018029	down
8939	XP_039467271.1	protein Tob1-like [Oreochromis aureus]	2505	219	0.781638	5.73568	3.49565e-20	139.03	115.8	139.03	T	T(0.782)S(0.209)PT(0.01)NLGLNVNSLLK	T(5.7)S(-5.7)PT(-19)NLGLNVNS(-120)LLK	1	3	-0.61944	10383	21406	21406	F6	47407	0.40586	0.28833	0.11777	0.18803	0.4	0.29	0.15	0.16	0.345	0.08	0.2319	0.155	0.01	0.0645	0.461	0.00364262	0.0261049	down
8986	XP_039453964.1	arf-GAP domain and FG repeat-containing protein 1a isoform X8 [Oreochromis aureus]	2655	177	0.998437	30.3629	6.1892e-13	80.418	59.979	80.418	T	SLLGESAPSLHLNKHT(0.998)PPNQS(0.001)PVVSR	S(-68)LLGES(-53)APS(-36)LHLNKHT(30)PPNQS(-30)PVVS(-34)R	16	4	0.77297	4020;8725	17760	17760	F6	37194	0.20358	0.18269	0.25723	0.3565	0.2	0.18	0.32	0.31	0.19	0.01	0.0526	0.315	0.01	0.0317	1.663	0.000535945	0.00997324	up
9014	XP_031609073.1	uncharacterized protein stbd1 [Oreochromis aureus]	2705	119	1	61.6789	0.0295934	61.679	21.612	61.679	T	RLT(1)AEK	RLT(62)AEK	3	3	0.050245	7497	15244	15244	F3	23701	0.33517	0.35507	0.13154	0.17336	0.33	0.35	0.17	0.15	0.34	0.01	0.0294	0.16	0.01	0.0625	0.471	0.000316579	0.00861811	down
9017	XP_031609177.1	tether containing UBX domain for GLUT4 isoform X2 [Oreochromis aureus]	2718	263	0.880704	11.6923	0.000498993	108.89	66.15	59.372	T	APPT(0.06)GS(0.06)QT(0.881)PEDDGEK	APPT(-12)GS(-12)QT(12)PEDDGEK	8	3	-0.8174	706	1554;1555	1554	F2	26692	0.30547	0.30932	0.16499	0.22021	0.3	0.31	0.21	0.19	0.305	0.01	0.0328	0.2	0.01	0.0500	0.656	0.000798952	0.0129703	down
9059	XP_031610287.1	protein transport protein Sec16A isoform X3 [Oreochromis aureus]	2843	2019	0.991552	21.5562	9.54759e-06	102.33	81.887	94.201	T	RT(0.096)S(0.909)LT(0.992)PQKDFY(0.003)DQMAK	RT(-10)S(10)LT(22)PQKDFY(-27)DQMAK	5	3	0.9707	7819;7820	15920;15921	15921	F4	40409	0.21591	0.17606	0.23954	0.36848	0.21	0.17	0.3	0.32	0.19	0.03	0.1579	0.31	0.01	0.0323	1.65	0.00444101	0.0301441	up
9101	XP_031611590.1	enhancer of mRNA-decapping protein 3 [Oreochromis aureus]	2983	205	0.993461	21.9841	0.00187695	63.727	47.836	63.727	T	S(0.995)RGT(0.993)PQEQT(0.011)PTR	S(23)RGT(22)PQEQT(-22)PT(-36)R	4	2	1.3164	9139	18712	18712	F1	13954	0.14917	0.2106	0.24272	0.3975	0.15	0.21	0.31	0.34	0.18	0.04	0.2222	0.325	0.02	0.0615	1.857	0.00930882	0.0447322	up
9117	XP_031612039.1	vitellogenin 3, phosvitinless [Oreochromis aureus]	3015	1048	0.632522	2.35853	3.37204e-12	96.44	71.646	76.294	T	ET(0.633)RNS(0.367)QEIMMDATAPQPVVSIK	ET(2.4)RNS(-2.4)QEIMMDAT(-49)APQPVVS(-73)IK	2	3	0.87423	2360	4652;4654;4655;4656;4657;4658	4657	F5	41559	0.31118	0.35986	0.13582	0.20156	0.31	0.36	0.17	0.17	0.335	0.04	0.1194	0.17	0	0	0.51	0.000562837	0.0103983	down
9132	XP_031612837.2	40S ribosomal protein S3a [Oreochromis aureus]	3079	265	0.999871	38.8883	0.0115417	64.827	43.957	64.827	T	ADGYEPPIQET(1)V	ADGY(-39)EPPIQET(39)V	11	2	1.8807	175	356	356	F2	43588	0.18544	0.15068	0.31875	0.34513	0.18	0.15	0.4	0.3	0.165	0.02	0.1212	0.35	0.07	0.2000	2.139	0.00474917	0.0316228	up
9142	XP_031612933.1	AMP deaminase 2-like isoform X1 [Oreochromis aureus]	3090	57	0.905206	9.79922	1.13053e-06	92.932	68.138	79.347	T	S(1)LPGT(0.905)PVS(0.095)LAHCPIDLR	S(40)LPGT(9.8)PVS(-9.8)LAHCPIDLR	5	3	-2.0847	8741;8742;10287	17791;17795	17795	F4	48411	0.38206	0.39209	0.49671	0.72913	0.38	0.39	0.62	0.63	0.385	0.01	0.026	0.625	0.01	0.0160	1.624	1.32404e-05	0.000953309	up
9185	XP_031613952.1	disintegrin and metalloproteinase domain-containing protein 10 [Oreochromis aureus]	3194	723	0.999998	56.763	2.83111e-105	187.47	125.43	187.47	T	HVSDTLNT(1)LR	HVS(-98)DT(-57)LNT(57)LR	8	3	-0.46316	4038	8115	8115	F3	31815	0.15783	0.21994	0.26739	0.35483	0.16	0.22	0.34	0.31	0.19	0.04	0.2105	0.325	0.02	0.0615	1.754	0.0105795	0.047895	up
9200	XP_031614414.1	septin 7b [Oreochromis aureus]	3237	415	0.710274	3.89439	3.54577e-05	77.506	67.406	76.713	T	LQQQQMEAT(0.29)RT(0.71)LEK	LQQQQMEAT(-3.9)RT(3.9)LEK	11	4	-3.0392	5681	11394;11395	11394	F3	32456	0.30327	0.36009	0.1202	0.21644	0.3	0.36	0.15	0.19	0.33	0.04	0.1212	0.17	0.03	0.1765	0.52	0.00446717	0.0302683	down
9237	XP_031615969.1	heat shock factor-binding protein 1b [Oreochromis aureus]	3378	67	1	110.927	8.15378e-32	147.17	121.97	147.17	T	NIADLMTQAGVEEIEAT(1)PEKAK	NIADLMT(-110)QAGVEEIEAT(110)PEKAK	17	4	0.63413	6279;6280	12573;12574	12574	F4	50302	0.14852	0.14873	0.24363	0.45912	0.15	0.15	0.31	0.4	0.15	0	0	0.355	0.06	0.1690	2.367	0.00137561	0.0168218	up
9240	XP_031616072.1	phosphoglucomutase-1 [Oreochromis aureus]	3386	115	0.663109	2.94096	1.22521e-28	140.55	95.594	119.97	T	AVGGIILT(0.663)AS(0.337)HNPGGPNGDFGIK	AVGGIILT(2.9)AS(-2.9)HNPGGPNGDFGIK	8	3	0.70419	1007	2134;2135;2136;2137;2138;2139;2140;2142;2143;2144;2145;2147;2148;2149	2147	F6	44116	0.20893	0.18603	0.25552	0.36486	0.21	0.18	0.32	0.31	0.195	0.02	0.1026	0.315	0.01	0.0317	1.625	0.00178675	0.0189864	up
9241	XP_031616072.1	phosphoglucomutase-1 [Oreochromis aureus]	3386	19	0.836224	7.08977	2.03148e-06	79.511	49.822	79.511	T	TKPYTDQKPGT(0.836)S(0.163)GLR	T(-63)KPY(-69)T(-34)DQKPGT(7.1)S(-7.1)GLR	11	4	1.8912	10077	20764	20764	F4	28122	0.19946	0.16908	0.22113	0.41033	0.2	0.17	0.28	0.35	0.185	0.02	0.1081	0.315	0.05	0.1587	1.714	0.00695776	0.0372173	up
9248	XP_039454606.1	CAD protein [Oreochromis aureus]	3426	1833	0.652086	2.72833	2.27478e-11	108.57	89.794	108.57	T	TWPTSSTHPPEPVKET(0.652)PMT(0.348)PER	T(-94)WPT(-90)S(-91)S(-90)T(-87)HPPEPVKET(2.7)PMT(-2.7)PER	16	4	-1.1372	2358;10546;10547	21740	21740	F5	34011	0.28553	0.33276	0.16179	0.21991	0.28	0.33	0.2	0.19	0.305	0.04	0.1311	0.195	0.01	0.0513	0.644	0.00294068	0.0233076	down
9313	XP_039459626.1	tumor necrosis factor alpha-induced protein 2-like [Oreochromis aureus]	3557	100	0.963212	14.1802	1.42053e-105	192.4	133.25	192.4	T	S(0.037)NT(0.963)DPTTSTVK	S(-14)NT(14)DPT(-75)T(-68)S(-83)T(-89)VK	3	2	2.6144	8903	18264;18265;18267	18267	F3	23864	0.17027	0.1661	0.25433	0.37536	0.17	0.16	0.32	0.32	0.165	0.01	0.0606	0.32	0	0	1.941	4.08909e-05	0.00256117	up
9316	XP_039460024.1	dnaJ homolog subfamily C member 5 [Oreochromis aureus]	3565	11	0.53313	1.38522	1.56127e-63	167.28	142.43	167.28	T	T(0.009)LS(0.07)T(0.533)S(0.388)GESLYAVLGVNK	T(-18)LS(-8.8)T(1.4)S(-1.4)GES(-36)LY(-120)AVLGVNK	4	3	4.4916	10145	20875	20875	F6	47910	0.14576	0.17563	0.32188	0.35673	0.14	0.17	0.4	0.31	0.155	0.02	0.129	0.355	0.06	0.1690	2.312	0.002964	0.0233722	up
9318	XP_039460377.1	E3 ubiquitin-protein ligase UBR4 isoform X11 [Oreochromis aureus]	3574	2861	0.757117	4.93982	1.37448e-31	103.06	91.248	103.06	T	T(0.757)S(0.243)PAEHGGSVGSESGGSAIDSVAGEHSVSGR	T(4.9)S(-4.9)PAEHGGS(-38)VGS(-62)ES(-67)GGS(-77)AIDS(-89)VAGEHS(-100)VS(-100)GR	1	4	-1.7695	10366	21351	21351	F3	33864	0.15926	0.20835	0.26411	0.36828	0.16	0.21	0.33	0.32	0.185	0.04	0.2162	0.325	0.01	0.0308	1.789	0.0054168	0.0323339	up
9368	XP_039467556.1	target of Myb protein 1 isoform X3 [Oreochromis aureus]	3721	160	0.990829	20.3357	1.56625e-07	105.16	91.149	105.16	T	GLEFPANQLEGY(0.009)T(0.991)PPQAPK	GLEFPANQLEGY(-20)T(20)PPQAPK	13	3	-0.085349	3206	6338	6338	F5	45271	0.18304	0.20855	0.25564	0.35277	0.18	0.21	0.32	0.3	0.195	0.02	0.1026	0.31	0.01	0.0323	1.6	0.00234857	0.022507	up
9389	XP_039469660.1	regulating synaptic membrane exocytosis protein 1 isoform X2 [Oreochromis aureus]	3766	1019	0.566457	1.17429	0.000706769	66.045	48.128	66.045	T	AHPYGS(0.001)PT(0.566)S(0.432)PAGTPSSGR	AHPY(-44)GS(-27)PT(1.2)S(-1.2)PAGT(-39)PS(-43)S(-43)GR	8	3	-2.568	426	913	913	F4	22156	0.29366	0.31227	0.15973	0.22967	0.29	0.31	0.2	0.2	0.3	0.01	0.0333	0.2	0	0	0.667	0.000243254	0.00720781	down
9398	XP_039470438.1	LOW QUALITY PROTEIN: rho family-interacting cell polarization regulator 1 [Oreochromis aureus]	3780	345	0.99998	47.0865	1.633e-07	81.807	66.217	81.807	T	ISAIFDQT(1)PPDT(1)PPLR	IS(-47)AIFDQT(47)PPDT(61)PPLR	8	3	-2.1926	4380	8849;8850	8849	F4	52490	0.43098	0.37246	0.42572	0.77084	0.43	0.37	0.54	0.66	0.4	0.04	0.1	0.6	0.08	0.1333	1.508	0.0114108	0.0480638	up
9406	XP_039470818.1	endoplasmin [Oreochromis aureus]	3794	44	0.5	0	3.37145e-05	55.366	38.209	55.366	T	DGS(0.5)RT(0.5)DDEVVQREEEAIQLDGLNAAQIK	DGS(0)RT(0)DDEVVQREEEAIQLDGLNAAQIK	5	5	-2.6936	1280	2637	2637	F3	50860	0.29251	0.33676	0.14856	0.22217	0.29	0.33	0.19	0.19	0.31	0.03	0.0968	0.19	0	0	0.615	0.000952748	0.0148884	down
9505	XP_031588690.1	rho GTPase-activating protein 35 [Oreochromis aureus]	819	1123	0.801042	6.04896	4.68874e-28	142.39	124.81	142.39	Y	HTEEENIY(0.801)S(0.199)VPHDSTQGK	HT(-62)EEENIY(6)S(-6)VPHDS(-85)T(-92)QGK	8	3	-1.482	4013	8067	8067	F3	29715	0.27309	0.36105	0.15171	0.21415	0.27	0.36	0.19	0.18	0.315	0.06	0.1905	0.185	0.01	0.0541	0.6	0.0085669	0.0425188	down
9551	XP_039477487.1	ligand-dependent corepressor isoform X3 [Oreochromis aureus]	3941	588	1	40.4755	0.00813426	40.475	15.134	40.475	Y	DLQNS(1)QHS(1)LY(1)DK	DLQNS(40)QHS(40)LY(40)DK	10	2	-2.5953	1422	2881	2881	F3	50176	0.28225	0.48135	0.090044	0.14635	0.28	0.48	0.11	0.13	0.38	0.14	0.3684	0.12	0.01	0.0833	0.339	0.00629498	0.0356069	down
